# Supplementary material for: Genome-Wide Analysis of mRNA and Long Noncoding RNA Profiles in Chronic Actinic Dermatitis
Source: Hindawi journal article supplement (doi:10.1155/2017/7479523), 2017-01-01
Supplement: f1 [file 7479523.f1.pdf]

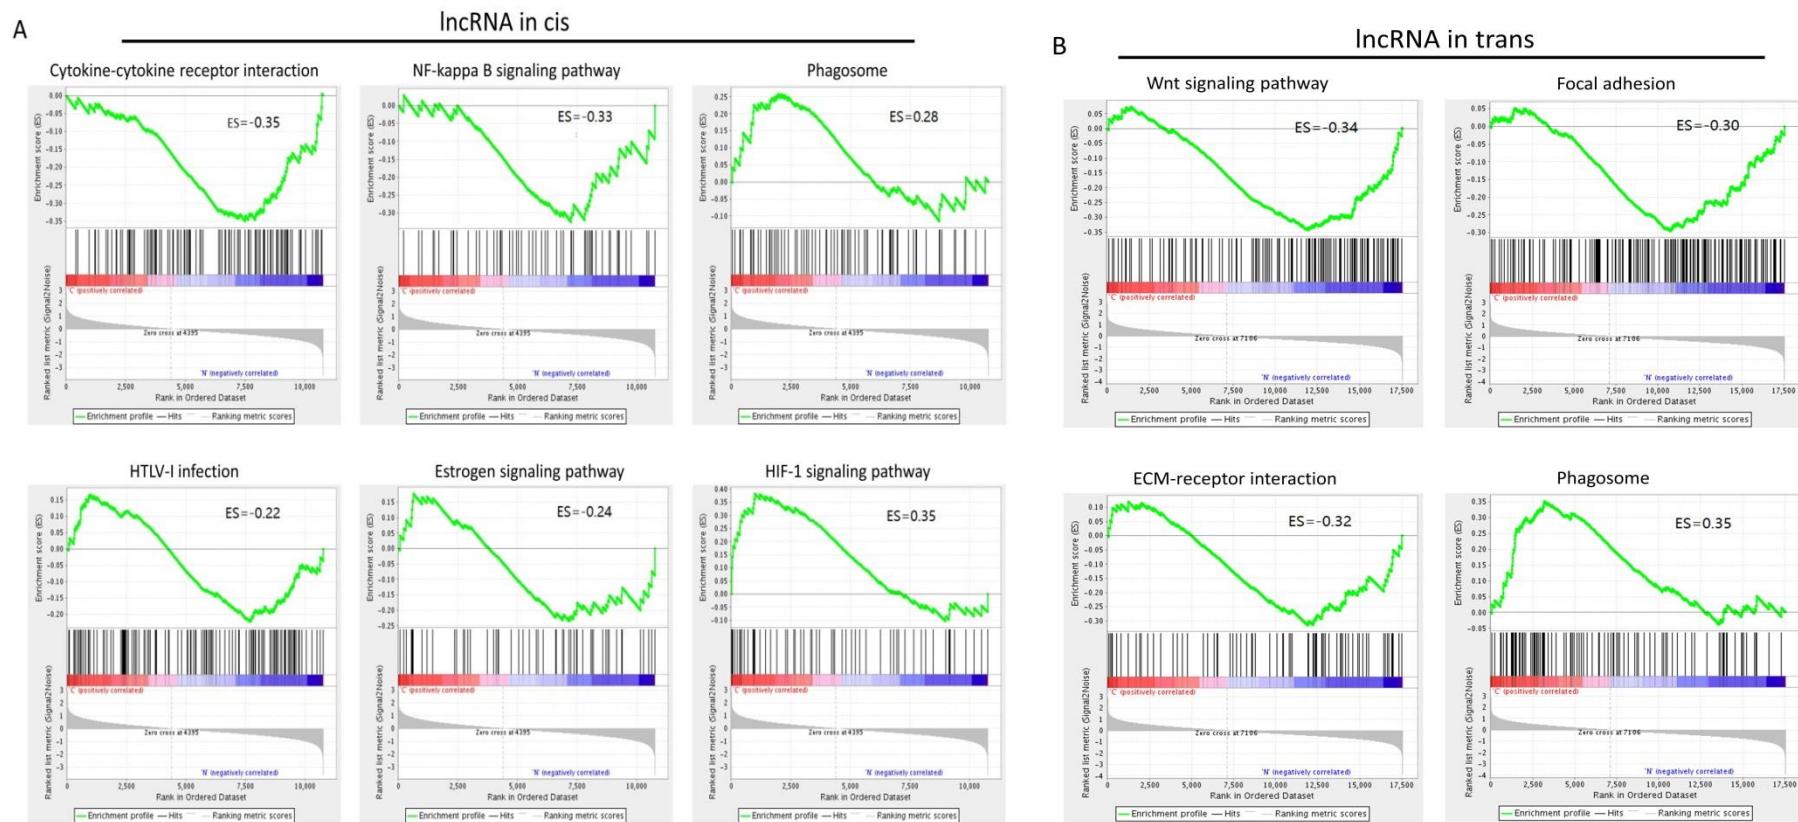

**Supplementary figure S1.** Pathways enriched in gene set enrichment analysis (GSEA) analysis. (A) Pathways enriched in both GSEA analysis and top 20 enriched pathways in KEGG analysis based on lncRNAs taking effect in cis. (B) Pathways enriched in both GSEA analysis and top 20 enriched pathways in KEGG analysis based on lncRNAs taking effect in trans.

**Supplementary Table S1.** Summary of patient characteristics.

|                        | CAD             | Control         | P-value |
|------------------------|-----------------|-----------------|---------|
| Total no. of subjects  | 8               | 8               |         |
| Sex, male, n (%)       | 8(100.0)        | 6(75.0)         | 0.467*  |
| Age (y), mean $\pm$ SD | 59.9 $\pm$ 9.5  | 55.3 $\pm$ 8.6  | 0.324** |
| Methodology used       |                 |                 |         |
| RNA sequencing         | n=4             | n=4             |         |
| Age (y), mean $\pm$ SD | 65.0 $\pm$ 10.7 | 54.3 $\pm$ 6.1  | 0.131** |
| Sex, male, n (%)       | 4(100.0)        | 2(50)           | 0.429*  |
| qRT-PCR                | n=4             | n=4             |         |
| Age (y), mean $\pm$ SD | 54.8 $\pm$ 5.0  | 56.3 $\pm$ 11.5 | 0.819** |

\*Statistical analyses were conducted using Fisher exact test.

\*\*Statistical analyses were conducted using student's t-test.

**Supplementary Table S2. IDs of GTEx samples used to compare with the controls in the study.**

| SAMPID                   | SMATSSCR | SMCENTER | SMRIN | SMTSD              | SMUBRID | SMTSISCH | SMTSPAX | SMNABTCH | SMGEBTCH   | SMGEBTCHT  |
|--------------------------|----------|----------|-------|--------------------|---------|----------|---------|----------|------------|------------|
| GTEX-111CU-1926-SM-5GZYZ | 1        | B1       | 5.9   | Skin - Sun Exposed | 1511    | 141      | 568     | BP-43783 | LCSET-4804 | TrueSeq.v1 |
| GTEX-111FC-0126-SM-5N9DL | 1        | B1       | 7.2   | Skin - Sun Exposed | 1511    | 1036     | 870     | BP-43989 | LCSET-4904 | TrueSeq.v1 |
| GTEX-111VG-2426-SM-5GZXD | 1        | B1       | 7.4   | Skin - Sun Exposed | 1511    | 1084     | 873     | BP-43693 | LCSET-4804 | TrueSeq.v1 |
| GTEX-1122O-2126-SM-5EGIR | 0        | B1       | 7.1   | Skin - Sun Exposed | 1511    | 128      | 875     | BP-43529 | LCSET-4764 | TrueSeq.v1 |
| GTEX-1128S-2326-SM-5GZZY | 0        | B1       | 7     | Skin - Sun Exposed | 1511    | 886      | 959     | BP-43783 | LCSET-4805 | TrueSeq.v1 |
| GTEX-113IC-0126-SM-5HL6T | 0        | B1       | 7.2   | Skin - Sun Exposed | 1511    | 94       | 1080    | BP-43529 | LCSET-4806 | TrueSeq.v1 |
| GTEX-113JC-2326-SM-5EQ4E | 1        | B1       | 7.5   | Skin - Sun Exposed | 1511    | 681      | 940     | BP-44460 | LCSET-4767 | TrueSeq.v1 |
| GTEX-117XS-2726-SM-5N9BL | 1        | B1       | 6.9   | Skin - Sun Exposed | 1511    | 916      | 538     | BP-43989 | LCSET-4904 | TrueSeq.v1 |
| GTEX-117YW-2626-SM-5GZZH | 1        | B1       | 6.8   | Skin - Sun Exposed | 1511    | 982      | 543     | BP-43507 | LCSET-4805 | TrueSeq.v1 |
| GTEX-117YX-2326-SM-5H12W | 0        | B1       | 6.4   | Skin - Sun Exposed | 1511    | 147      | 659     | BP-43783 | LCSET-4805 | TrueSeq.v1 |
| GTEX-1192W-2626-SM-5Q5AF | 0        | B1       | 5.8   | Skin - Sun Exposed | 1511    | 810      | 500     | BP-44261 | LCSET-4952 | TrueSeq.v1 |
| GTEX-1192X-0226-SM-5H12D | 0        | B1       | 6     | Skin - Sun Exposed | 1511    | 856      | 946     | BP-43783 | LCSET-4805 | TrueSeq.v1 |
| GTEX-11DXW-0226-SM-5H122 | 1        | C1       | 7.2   | Skin - Sun Exposed | 1511    | 1089     | 1347    | BP-43730 | LCSET-4805 | TrueSeq.v1 |
| GTEX-11DXX-2426-SM-5GZZW | 1        | B1       | 6.8   | Skin - Sun Exposed | 1511    | 161      | 452     | BP-43783 | LCSET-4805 | TrueSeq.v1 |
| GTEX-11DXY-2626-SM-5GIE7 | 1        | B1       | 6.6   | Skin - Sun Exposed | 1511    | 963      | 1077    | BP-44261 | LCSET-4796 | TrueSeq.v1 |
| GTEX-11DXZ-2326-SM-5EGGV | 1        | B1       | 8.1   | Skin - Sun Exposed | 1511    | 328      | 873     | BP-44460 | LCSET-4764 | TrueSeq.v1 |
| GTEX-11DYG-0126-SM-59883 | 0        | C1       | 7.7   | Skin - Sun Exposed | 1511    | 781      | 926     | BP-44577 | LCSET-4417 | TrueSeq.v1 |
| GTEX-11DZ1-0126-SM-5985Q | 1        | C1       | 7.7   | Skin - Sun Exposed | 1511    | 1193     | 610     | BP-44902 | LCSET-4417 | TrueSeq.v1 |
| GTEX-11EI6-0126-SM-5985R | 0        | C1       | 7.4   | Skin - Sun Exposed | 1511    | 969      | 1438    | BP-44902 | LCSET-4417 | TrueSeq.v1 |
| GTEX-11EM3-2426-SM-59861 | 1        | B1       | 7.9   | Skin - Sun Exposed | 1511    | 240      | 428     | BP-44902 | LCSET-4417 | TrueSeq.v1 |
| GTEX-11EMC-2926-SM-5EQ4F | 0        | B1       | 6.4   | Skin - Sun Exposed | 1511    | 809      | 591     | BP-44460 | LCSET-4767 | TrueSeq.v1 |
| GTEX-11EQ8-0126-SM-5EQ54 | 1        | C1       | 6.8   | Skin - Sun Exposed | 1511    | 460      | 647     | BP-44460 | LCSET-4767 | TrueSeq.v1 |
| GTEX-11EQ9-2426-SM-5HL5T | 0        | B1       | 7.5   | Skin - Sun Exposed | 1511    | 321      | 378     | BP-43730 | LCSET-4806 | TrueSeq.v1 |
| GTEX-11GS4-2726-SM-5A5LE | 0        | B1       | 7.7   | Skin - Sun Exposed | 1511    | 915      | 529     | BP-44512 | LCSET-4423 | TrueSeq.v1 |

| SAMPID                   | SMATSSCR | SMCENTER | SMRIN | SMTSD              | SMUBRID | SMTSISCH | SMTSPAX | SMNABTCH | SMGEBTCH   | SMGEBTCHT  |
|--------------------------|----------|----------|-------|--------------------|---------|----------|---------|----------|------------|------------|
| GTEX-11GSO-2426-SM-5A5LY | 1        | B1       | 6.8   | Skin - Sun Exposed | 1511    | 969      | 580     | BP-44512 | LCSET-4423 | TrueSeq.v1 |
| GTEX-11GSP-2526-SM-5N9BP | 1        | B1       | 7.4   | Skin - Sun Exposed | 1511    | 920      | 416     | BP-43989 | LCSET-4904 | TrueSeq.v1 |
| GTEX-11H98-0126-SM-5EGHG | 1        | B1       | 7.8   | Skin - Sun Exposed | 1511    | 733      | 598     | BP-43495 | LCSET-4764 | TrueSeq.v1 |
| GTEX-11ILO-0126-SM-5A5LN | 0        | C1       | 7.1   | Skin - Sun Exposed | 1511    | 372      | 1103    | BP-44512 | LCSET-4423 | TrueSeq.v1 |
| GTEX-11LCK-1026-SM-5A5KB | 0        | B1       | 7.8   | Skin - Sun Exposed | 1511    | 259      | 1078    | BP-44264 | LCSET-4423 | TrueSeq.v1 |
| GTEX-11NSD-2226-SM-5986V | 0        | B1       | 7.2   | Skin - Sun Exposed | 1511    | 287      | 849     | BP-44902 | LCSET-4417 | TrueSeq.v1 |
| GTEX-11NUK-0126-SM-5A5L3 | 1        | B1       | 7.4   | Skin - Sun Exposed | 1511    | 894      | 887     | BP-44264 | LCSET-4423 | TrueSeq.v1 |
| GTEX-11O72-0126-SM-59887 | 0        | C1       | 7.5   | Skin - Sun Exposed | 1511    | 922      | 983     | BP-44902 | LCSET-4417 | TrueSeq.v1 |
| GTEX-11OC5-0126-SM-5HL6A | 0        | B1       | 6.5   | Skin - Sun Exposed | 1511    | 1272     | 914     | BP-43730 | LCSET-4806 | TrueSeq.v1 |
| GTEX-11OF3-2626-SM-5GU7F | 0        | B1       | 8.3   | Skin - Sun Exposed | 1511    | 887      | 917     | BP-44312 | LCSET-5132 | TrueSeq.v1 |
| GTEX-11P7K-2126-SM-5GU7G | 0        | B1       | 6.8   | Skin - Sun Exposed | 1511    | 351      | 818     | BP-44312 | LCSET-4803 | TrueSeq.v1 |
| GTEX-11P81-2326-SM-59875 | 0        | B1       | 8.4   | Skin - Sun Exposed | 1511    | 350      | 525     | BP-44902 | LCSET-4417 | TrueSeq.v1 |
| GTEX-11P82-1626-SM-59879 | 0        | B1       | 6.2   | Skin - Sun Exposed | 1511    | 194      | 862     | BP-44902 | LCSET-4417 | TrueSeq.v1 |
| GTEX-11TT1-2526-SM-5EGIB | 0        | B1       | 7.7   | Skin - Sun Exposed | 1511    | 135      | 400     | BP-45028 | LCSET-4764 | TrueSeq.v1 |
| GTEX-11TTK-0126-SM-5987B | 1        | C1       | 6.8   | Skin - Sun Exposed | 1511    | 1122     | 784     | BP-44902 | LCSET-4417 | TrueSeq.v1 |
| GTEX-11TUW-2726-SM-5EQLC | 1        | B1       | 6.5   | Skin - Sun Exposed | 1511    | 824      | 871     | BP-44114 | LCSET-4790 | TrueSeq.v1 |
| GTEX-11UD1-0126-SM-5PNYG | 1        | B1       | 5.7   | Skin - Sun Exposed | 1511    | 1357     | 1116    | BP-47888 | LCSET-4918 | TrueSeq.v1 |
| GTEX-11UD2-0226-SM-5EQKY | 0        | B1       | 7.4   | Skin - Sun Exposed | 1511    | 845      | 1339    | BP-44114 | LCSET-4790 | TrueSeq.v1 |
| GTEX-11VI4-1726-SM-5CVLH | 0        | B1       | 6.7   | Skin - Sun Exposed | 1511    | 315      | 958     | BP-44525 | LCSET-4633 | TrueSeq.v1 |
| GTEX-11WQC-2526-SM-5CVLE | 1        | B1       | 6.8   | Skin - Sun Exposed | 1511    | 818      | 540     | BP-44525 | LCSET-4633 | TrueSeq.v1 |
| GTEX-11WQK-0526-SM-5EQLD | 0        | B1       | 7.8   | Skin - Sun Exposed | 1511    | 731      | 945     | BP-44114 | LCSET-4790 | TrueSeq.v1 |
| GTEX-11XUK-2026-SM-5EQLF | 0        | B1       | 7.5   | Skin - Sun Exposed | 1511    | 334      | 1107    | BP-44114 | LCSET-4790 | TrueSeq.v1 |
| GTEX-11ZTS-0126-SM-5EQ6M | 0        | B1       | 7.4   | Skin - Sun Exposed | 1511    | 599      | 866     | BP-45028 | LCSET-4767 | TrueSeq.v1 |
| GTEX-11ZTT-2426-SM-5EQLS | 1        | B1       | 7.3   | Skin - Sun Exposed | 1511    | 247      | 1076    | BP-44114 | LCSET-4790 | TrueSeq.v1 |
| GTEX-11ZU8-2526-SM-5EQKI | 0        | B1       | 7.9   | Skin - Sun Exposed | 1511    | 1020     | 426     | BP-44312 | LCSET-4790 | TrueSeq.v1 |

| SAMPID                   | SMATSSCR | SMCENTER | SMRIN | SMTSD              | SMUBRID | SMTSISCH | SMTSPAX | SMNABTCH | SMGEBTCH   | SMGEBTCHT  |
|--------------------------|----------|----------|-------|--------------------|---------|----------|---------|----------|------------|------------|
| GTEX-11ZUS-0626-SM-59885 | 1        | C1       | 8.4   | Skin - Sun Exposed | 1511    | 1359     | 1131    | BP-44577 | LCSET-4417 | TrueSeq.v1 |
| GTEX-11ZVC-2526-SM-5FQTE | 0        | B1       | 8.2   | Skin - Sun Exposed | 1511    | 640      | 517     | BP-43823 | LCSET-4793 | TrueSeq.v1 |
| GTEX-1211K-2026-SM-5EQ4Z | 0        | B1       | 7.5   | Skin - Sun Exposed | 1511    | 145      | 411     | BP-44399 | LCSET-4767 | TrueSeq.v1 |
| GTEX-12126-0326-SM-5PNW3 | 1        | C1       | 6.4   | Skin - Sun Exposed | 1511    | 927      | 957     | BP-47888 | LCSET-4917 | TrueSeq.v1 |
| GTEX-1212Z-2526-SM-5EGKP | 1        | B1       | 7.6   | Skin - Sun Exposed | 1511    | 757      | 1005    | BP-45028 | LCSET-4797 | TrueSeq.v1 |
| GTEX-12584-0126-SM-5EGKQ | 1        | B1       | 8.7   | Skin - Sun Exposed | 1511    | 926      | 615     | BP-45028 | LCSET-4797 | TrueSeq.v1 |
| GTEX-12696-2426-SM-5EQ6H | 0        | B1       | 7.1   | Skin - Sun Exposed | 1511    | 600      | 1095    | BP-44525 | LCSET-4767 | TrueSeq.v1 |
| GTEX-1269C-2526-SM-5EGJ3 | 1        | B1       | 7.5   | Skin - Sun Exposed | 1511    | 985      | 600     | BP-44399 | LCSET-4797 | TrueSeq.v1 |
| GTEX-12C56-1726-SM-5EQ61 | 1        | B1       | 6.6   | Skin - Sun Exposed | 1511    | 241      | 1190    | BP-44399 | LCSET-4767 | TrueSeq.v1 |
| GTEX-12KS4-0326-SM-5EQ41 | 0        | C1       | 8.4   | Skin - Sun Exposed | 1511    | 464      | 988     | BP-44399 | LCSET-4767 | TrueSeq.v1 |
| GTEX-12WS9-0126-SM-5EGL7 | 0        | C1       | 8.4   | Skin - Sun Exposed | 1511    | 496      | 1193    | BP-45028 | LCSET-4797 | TrueSeq.v1 |
| GTEX-12WSA-0226-SM-5BC5V | 0        | C1       | 6.2   | Skin - Sun Exposed | 1511    | 934      | 1417    | BP-43916 | LCSET-4455 | TrueSeq.v1 |
| GTEX-12WSB-0126-SM-59HJN | 0        | C1       | 7.8   | Skin - Sun Exposed | 1511    | 1106     | 548     | BP-44902 | LCSET-4419 | TrueSeq.v1 |
| GTEX-12WSC-0126-SM-5EQ4P | 1        | C1       | 8.3   | Skin - Sun Exposed | 1511    | 787      | 479     | BP-44399 | LCSET-4767 | TrueSeq.v1 |
| GTEX-12WSD-0126-SM-59HKN | 0        | C1       | 6.2   | Skin - Sun Exposed | 1511    | 484      | 801     | BP-44577 | LCSET-4419 | TrueSeq.v1 |
| GTEX-12WSG-2826-SM-5FQUS | 1        | B1       | 7.7   | Skin - Sun Exposed | 1511    | 427      | 1204    | BP-44157 | LCSET-4793 | TrueSeq.v1 |
| GTEX-12WSJ-1826-SM-5GCNY | 1        | B1       | 7.3   | Skin - Sun Exposed | 1511    | 208      | 1018    | BP-43881 | LCSET-4795 | TrueSeq.v1 |
| GTEX-12WSK-2326-SM-5GCOH | 0        | B1       | 7.7   | Skin - Sun Exposed | 1511    | 208      | 378     | BP-44157 | LCSET-4795 | TrueSeq.v1 |
| GTEX-12WSL-2526-SM-5GCNJ | 1        | B1       | 8.1   | Skin - Sun Exposed | 1511    | 353      | 500     | BP-44157 | LCSET-4795 | TrueSeq.v1 |
| GTEX-12WSN-2326-SM-5DUVG | 1        | B1       | 8     | Skin - Sun Exposed | 1511    | 290      | 599     | BP-44437 | LCSET-4634 | TrueSeq.v1 |
| GTEX-12ZZW-0126-SM-5DUVB | 0        | C1       | 6     | Skin - Sun Exposed | 1511    | 1090     | 946     | BP-44525 | LCSET-4634 | TrueSeq.v1 |
| GTEX-12ZZX-0126-SM-5EGK9 | 0        | C1       | 7.9   | Skin - Sun Exposed | 1511    | 584      | 718     | BP-44901 | LCSET-4797 | TrueSeq.v1 |
| GTEX-12ZZY-0226-SM-5LZVE | 0        | C1       | 8.7   | Skin - Sun Exposed | 1511    | 510      | 826     | BP-43956 | LCSET-4900 | TrueSeq.v1 |
| GTEX-12ZZZ-0626-SM-5DUXI | 0        | B1       | 7.3   | Skin - Sun Exposed | 1511    | 822      | 1063    | BP-44437 | LCSET-4634 | TrueSeq.v1 |
| GTEX-13111-1626-SM-5EGJY | 1        | B1       | 7.4   | Skin - Sun Exposed | 1511    | 321      | 448     | BP-44901 | LCSET-4797 | TrueSeq.v1 |

| SAMPID                   | SMATSSCR | SMCENTER | SMRIN | SMTSD              | SMUBRID | SMTSISCH | SMTSPAX | SMNABTCH | SMGEBTCH   | SMGEBTCHT  |
|--------------------------|----------|----------|-------|--------------------|---------|----------|---------|----------|------------|------------|
| GTEX-13112-2826-SM-5DUWH | 1        | B1       | 8     | Skin - Sun Exposed | 1511    | 1355     | 496     | BP-44437 | LCSET-4634 | TrueSeq.v1 |
| GTEX-13113-1926-SM-5LZWG | 0        | B1       | 7.5   | Skin - Sun Exposed | 1511    | 296      | 798     | BP-43956 | LCSET-4900 | TrueSeq.v1 |
| GTEX-1313W-0126-SM-5LZUN | 1        | C1       | 7.2   | Skin - Sun Exposed | 1511    | 618      | 690     | BP-45782 | LCSET-4900 | TrueSeq.v1 |
| GTEX-1314G-1526-SM-5EGK2 | 0        | B1       | 8     | Skin - Sun Exposed | 1511    | 477      | 759     | BP-44901 | LCSET-4797 | TrueSeq.v1 |
| GTEX-131XE-2326-SM-5PNZ2 | 1        | B1       | 7.1   | Skin - Sun Exposed | 1511    | 240      | 613     | BP-47901 | LCSET-4918 | TrueSeq.v1 |
| GTEX-131XF-2126-SM-5DUWS | 0        | B1       | 6.8   | Skin - Sun Exposed | 1511    | 380      | 1124    | BP-44437 | LCSET-4634 | TrueSeq.v1 |
| GTEX-131XG-2626-SM-5KM17 | 0        | B1       | 6.1   | Skin - Sun Exposed | 1511    | 258      | 529     | BP-45499 | LCSET-4820 | TrueSeq.v1 |
| GTEX-131XH-2226-SM-5DUXJ | 0        | B1       | 7.7   | Skin - Sun Exposed | 1511    | 1217     | 560     | BP-44437 | LCSET-4634 | TrueSeq.v1 |
| GTEX-131XW-0426-SM-5LZWP | 1        | C1       | 7.1   | Skin - Sun Exposed | 1511    | 655      | 948     | BP-45782 | LCSET-4900 | TrueSeq.v1 |
| GTEX-131YS-0126-SM-5KM1M | 1        | C1       | 7.2   | Skin - Sun Exposed | 1511    | 942      | 1013    | BP-46482 | LCSET-4820 | TrueSeq.v1 |
| GTEX-132NY-0326-SM-5IUBL | 0        | C1       | 6.7   | Skin - Sun Exposed | 1511    | 492      | 1052    | BP-45499 | LCSET-4814 | TrueSeq.v1 |
| GTEX-133LE-1826-SM-5J1MV | 0        | C1       | 6.7   | Skin - Sun Exposed | 1511    | 301      | 1272    | BP-46482 | LCSET-4816 | TrueSeq.v1 |
| GTEX-1399R-2726-SM-5IUBA | 1        | B1       | 7.6   | Skin - Sun Exposed | 1511    | 334      | 873     | BP-46482 | LCSET-4814 | TrueSeq.v1 |
| GTEX-1399T-2826-SM-5KLYZ | 1        | B1       | 7.5   | Skin - Sun Exposed | 1511    | 947      | 898     | BP-46589 | LCSET-4820 | TrueSeq.v1 |
| GTEX-1399U-2326-SM-5K7WY | 0        | B1       | 5.8   | Skin - Sun Exposed | 1511    | 362      | 528     | BP-45499 | LCSET-4819 | TrueSeq.v1 |
| GTEX-139D8-0226-SM-5KLZO | 0        | C1       | 7.5   | Skin - Sun Exposed | 1511    | 417      | 1003    | BP-46589 | LCSET-4820 | TrueSeq.v1 |
| GTEX-139T4-0226-SM-5HL5S | 1        | B1       | 6.4   | Skin - Sun Exposed | 1511    | 1352     | 1238    | BP-45268 | LCSET-4806 | TrueSeq.v1 |
| GTEX-139T8-0126-SM-5K7XZ | 0        | C1       | 7.2   | Skin - Sun Exposed | 1511    | 574      | 596     | BP-45499 | LCSET-4819 | TrueSeq.v1 |
| GTEX-139TS-2826-SM-5J1OO | 1        | B1       | 7.3   | Skin - Sun Exposed | 1511    | 1302     | 942     | BP-46925 | LCSET-4816 | TrueSeq.v1 |
| GTEX-139TT-0126-SM-5K7Y5 | 0        | B1       | 8     | Skin - Sun Exposed | 1511    | 1165     | 1202    | BP-45485 | LCSET-4819 | TrueSeq.v1 |
| GTEX-139TU-0126-SM-5K7WH | 1        | C1       | 7.7   | Skin - Sun Exposed | 1511    | 527      | 830     | BP-46925 | LCSET-4818 | TrueSeq.v1 |
| GTEX-139UW-2826-SM-5L3E7 | 0        | B1       | 7.7   | Skin - Sun Exposed | 1511    | 845      | 425     | BP-46589 | LCSET-4822 | TrueSeq.v1 |
| GTEX-13CF2-2526-SM-5LZYX | 0        | B1       | 7.3   | Skin - Sun Exposed | 1511    | 1427     | 586     | BP-45782 | LCSET-4901 | TrueSeq.v1 |
| GTEX-13CF3-2426-SM-5IFGX | 1        | B1       | 7.5   | Skin - Sun Exposed | 1511    | 213      | 360     | BP-46589 | LCSET-4813 | TrueSeq.v1 |
| GTEX-13D11-2426-SM-5KM1V | 0        | B1       | 8     | Skin - Sun Exposed | 1511    | 166      | 1119    | BP-45499 | LCSET-4820 | TrueSeq.v1 |

| SAMPID                   | SMATSSCR | SMCENTER | SMRIN | SMTSD              | SMUBRID | SMTSISCH | SMTSPAX | SMNABTCH | SMGEBTCH   | SMGEBTCHT  |
|--------------------------|----------|----------|-------|--------------------|---------|----------|---------|----------|------------|------------|
| GTEX-13FH7-2026-SM-5IJCR | 1        | B1       | 7.3   | Skin - Sun Exposed | 1511    | 256      | 729     | BP-46680 | LCSET-4814 | TrueSeq.v1 |
| GTEX-13FHO-0226-SM-5IFGY | 1        | C1       | 7.2   | Skin - Sun Exposed | 1511    | 631      | 514     | BP-46589 | LCSET-4813 | TrueSeq.v1 |
| GTEX-13FHP-0126-SM-5IJBG | 1        | C1       | 8     | Skin - Sun Exposed | 1511    | 827      | 1106    | BP-46978 | LCSET-4814 | TrueSeq.v1 |
| GTEX-13FTW-2626-SM-5K7WL | 1        | B1       | 6.4   | Skin - Sun Exposed | 1511    | 371      | 470     | BP-46943 | LCSET-4819 | TrueSeq.v1 |
| GTEX-13FTX-1826-SM-5J1NX | 1        | B1       | 6.2   | Skin - Sun Exposed | 1511    | 213      | 1044    | BP-46453 | LCSET-4816 | TrueSeq.v1 |
| GTEX-13FTY-0526-SM-5L3EV | 1        | B1       | 6     | Skin - Sun Exposed | 1511    | 727      | 597     | BP-46650 | LCSET-4822 | TrueSeq.v1 |
| GTEX-13FXS-0226-SM-5IUCK | 1        | B1       | 6.8   | Skin - Sun Exposed | 1511    | 566      | 1046    | BP-46943 | LCSET-4814 | TrueSeq.v1 |
| GTEX-13G51-2526-SM-5LZYK | 1        | B1       | 8.2   | Skin - Sun Exposed | 1511    | 925      | 835     | BP-46529 | LCSET-4901 | TrueSeq.v1 |
| GTEX-13IVO-0126-SM-5J1NG | 1        | C1       | 6.7   | Skin - Sun Exposed | 1511    | 556      | 1202    | BP-46650 | LCSET-4816 | TrueSeq.v1 |
| GTEX-13JUV-2726-SM-5LZZ8 | 1        | B1       | 7.8   | Skin - Sun Exposed | 1511    | 586      | 1098    | BP-46529 | LCSET-4901 | TrueSeq.v1 |
| GTEX-13N11-2526-SM-5K7UE | 1        | B1       | 7.2   | Skin - Sun Exposed | 1511    | 228      | 971     | BP-46978 | LCSET-4818 | TrueSeq.v1 |
| GTEX-13N1W-0126-SM-5K7VT | 1        | C1       | 7.4   | Skin - Sun Exposed | 1511    | 612      | 700     | BP-47051 | LCSET-4818 | TrueSeq.v1 |
| GTEX-13N2G-2626-SM-5J1OT | 1        | B1       | 7.1   | Skin - Sun Exposed | 1511    | 589      | 889     | BP-46650 | LCSET-4816 | TrueSeq.v1 |
| GTEX-13NYB-2526-SM-5K7Z6 | 0        | B1       | 7.1   | Skin - Sun Exposed | 1511    | 1153     | 871     | BP-46680 | LCSET-4819 | TrueSeq.v1 |
| GTEX-13NYC-0326-SM-5K7WP | 1        | B1       | 6.7   | Skin - Sun Exposed | 1511    | 970      | 703     | BP-46734 | LCSET-4819 | TrueSeq.v1 |
| GTEX-13NYS-0126-SM-5MR3W | 1        | B1       | 7.7   | Skin - Sun Exposed | 1511    | 846      | 804     | BP-46529 | LCSET-4902 | TrueSeq.v1 |
| GTEX-13NZ8-0826-SM-5MR3I | 1        | C1       | 7.3   | Skin - Sun Exposed | 1511    | 1345     | 482     | BP-46529 | LCSET-4902 | TrueSeq.v1 |
| GTEX-13NZA-0226-SM-5K7Z7 | 2        | B1       | 6.5   | Skin - Sun Exposed | 1511    | 1327     | 528     | BP-46978 | LCSET-4819 | TrueSeq.v1 |
| GTEX-13NZB-2526-SM-5J1OM | 1        | B1       | 6.7   | Skin - Sun Exposed | 1511    | 395      | 758     | BP-46925 | LCSET-4816 | TrueSeq.v1 |
| GTEX-13O1R-0126-SM-5L3EH | 1        | B1       | 8.4   | Skin - Sun Exposed | 1511    | 801      | 489     | BP-47051 | LCSET-4822 | TrueSeq.v1 |
| GTEX-13O21-1426-SM-5K7X1 | 0        | B1       | 6     | Skin - Sun Exposed | 1511    | 222      | 504     | BP-46978 | LCSET-4819 | TrueSeq.v1 |
| GTEX-13O3O-0126-SM-5KM4E | 0        | C1       | 6.6   | Skin - Sun Exposed | 1511    | 778      | 925     | BP-47141 | LCSET-4821 | TrueSeq.v1 |
| GTEX-13O3P-0126-SM-5KM4S | 0        | C1       | 7.4   | Skin - Sun Exposed | 1511    | 405      | 1239    | BP-47524 | LCSET-4821 | TrueSeq.v1 |
| GTEX-13O3Q-2426-SM-5IJBK | 1        | B1       | 5.8   | Skin - Sun Exposed | 1511    | 1157     | 688     | BP-47125 | LCSET-4814 | TrueSeq.v1 |
| GTEX-13OVG-1926-SM-5L3DK | 0        | B1       | 7.6   | Skin - Sun Exposed | 1511    | 644      | 618     | BP-47125 | LCSET-4822 | TrueSeq.v1 |

| SAMPID                   | SMATSSCR | SMCENTER | SMRIN | SMTSD              | SMUBRID | SMTSISCH | SMTSPAX | SMNABTCH | SMGEBTCH   | SMGEBTCHT  |
|--------------------------|----------|----------|-------|--------------------|---------|----------|---------|----------|------------|------------|
| GTEX-13OVH-0126-SM-5MR4B | 0        | C1       | 7.6   | Skin - Sun Exposed | 1511    | 562      | 1426    | BP-47656 | LCSET-4902 | TrueSeq.v1 |
| GTEX-13OVI-1426-SM-5L3EY | 0        | B1       | 8.7   | Skin - Sun Exposed | 1511    | 187      | 519     | BP-47070 | LCSET-4822 | TrueSeq.v1 |
| GTEX-13OVJ-0126-SM-5KM36 | 1        | B1       | 6.7   | Skin - Sun Exposed | 1511    | 1117     | 816     | BP-47524 | LCSET-4821 | TrueSeq.v1 |
| GTEX-13OVL-0226-SM-5L3E9 | 1        | B1       | 8.4   | Skin - Sun Exposed | 1511    | 855      | 1258    | BP-47125 | LCSET-4822 | TrueSeq.v1 |
| GTEX-13OW5-0126-SM-5MR3A | 0        | B1       | 7.8   | Skin - Sun Exposed | 1511    | 843      | 679     | BP-47656 | LCSET-4902 | TrueSeq.v1 |
| GTEX-13OW6-0426-SM-5L3HM | 1        | C1       | 7.8   | Skin - Sun Exposed | 1511    | 558      | 1283    | BP-47486 | LCSET-4823 | TrueSeq.v1 |
| GTEX-13OW7-0126-SM-5MR3B | 0        | C1       | 7.3   | Skin - Sun Exposed | 1511    | 802      | 897     | BP-47656 | LCSET-4902 | TrueSeq.v1 |
| GTEX-13OW8-1326-SM-5J1OW | 1        | B1       | 7.4   | Skin - Sun Exposed | 1511    | 1093     | 697     | BP-47125 | LCSET-4816 | TrueSeq.v1 |
| GTEX-13PDP-0126-SM-5L3HD | 1        | C1       | 6.7   | Skin - Sun Exposed | 1511    | 842      | 1068    | BP-47486 | LCSET-4823 | TrueSeq.v1 |
| GTEX-13PVQ-0126-SM-5SIB4 | 0        | C1       | 7.4   | Skin - Sun Exposed | 1511    | 846      | 1177    | BP-47656 | LCSET-5174 | TrueSeq.v1 |
| GTEX-13PVR-2326-SM-5QGR1 | 0        | B1       | 7.6   | Skin - Sun Exposed | 1511    | 242      | 565     | BP-48448 | LCSET-4954 | TrueSeq.v1 |
| GTEX-13RTJ-2426-SM-5S2Q2 | 1        | B1       | 6.7   | Skin - Sun Exposed | 1511    | 930      | 1025    | BP-48647 | LCSET-4988 | TrueSeq.v1 |
| GTEX-13S7M-0126-SM-5SI6A | 1        | C1       | 7.3   | Skin - Sun Exposed | 1511    | 575      | 956     | BP-48647 | LCSET-4995 | TrueSeq.v1 |
| GTEX-13SLW-0126-SM-5SI6C | 0        | B1       | 6.1   | Skin - Sun Exposed | 1511    | 1187     | 713     | BP-48647 | LCSET-4995 | TrueSeq.v1 |
| GTEX-13SLX-0526-SM-5S2ON | 1        | B1       | 8     | Skin - Sun Exposed | 1511    | 1063     | 571     | BP-48564 | LCSET-4988 | TrueSeq.v1 |
| GTEX-13U4I-0126-SM-5LU38 | 0        | C1       | 7.1   | Skin - Sun Exposed | 1511    | 396      | 1048    | BP-47524 | LCSET-4824 | TrueSeq.v1 |
| GTEX-13VXT-0126-SM-5LU4I | 1        | B1       | 7.5   | Skin - Sun Exposed | 1511    | 438      | 828     | BP-47141 | LCSET-4824 | TrueSeq.v1 |
| GTEX-13VXU-0126-SM-5SI9F | 1        | B1       | 7.2   | Skin - Sun Exposed | 1511    | 920      | 626     | BP-47656 | LCSET-5174 | TrueSeq.v1 |
| GTEX-13W3W-2426-SM-5LU5B | 0        | B1       | 6.5   | Skin - Sun Exposed | 1511    | 497      | 1030    | BP-47486 | LCSET-4824 | TrueSeq.v1 |
| GTEX-13W46-0226-SM-5SIAG | 1        | C1       | 7.4   | Skin - Sun Exposed | 1511    | 493      | 463     | BP-47656 | LCSET-5174 | TrueSeq.v1 |
| GTEX-13X6I-0626-SM-5QGP9 | 1        | C1       | 7.8   | Skin - Sun Exposed | 1511    | 807      | 1342    | BP-48057 | LCSET-4954 | TrueSeq.v1 |
| GTEX-13X6J-0126-SM-5QGOU | 1        | C1       | 7.8   | Skin - Sun Exposed | 1511    | 1251     | 1145    | BP-48057 | LCSET-4954 | TrueSeq.v1 |
| GTEX-13YAN-0326-SM-5O9DF | 0        | C1       | 8.2   | Skin - Sun Exposed | 1511    | 601      | 1198    | BP-47675 | LCSET-4910 | TrueSeq.v1 |
| GTEX-144GN-2326-SM-5LU4F | 0        | B1       | 6.8   | Skin - Sun Exposed | 1511    | 251      | 452     | BP-47591 | LCSET-4824 | TrueSeq.v1 |
| GTEX-145LS-0126-SM-5QGP1 | 0        | C1       | 7.6   | Skin - Sun Exposed | 1511    | 848      | 731     | BP-48057 | LCSET-4954 | TrueSeq.v1 |



| SAMPID                   | SMATSSCR | SMCENTER | SMRIN | SMTSD              | SMUBRID | SMTSISCH | SMTSPAX | SMNABTCH | SMGEBTCH   | SMGEBTCHT  |
|--------------------------|----------|----------|-------|--------------------|---------|----------|---------|----------|------------|------------|
| GTEX-145LT-1726-SM-5QGP3 | 0        | B1       | 7.2   | Skin - Sun Exposed | 1511    | 441      | 427     | BP-48057 | LCSET-4954 | TrueSeq.v1 |
| GTEX-145LV-2126-SM-5LU8N | 1        | B1       | 6.9   | Skin - Sun Exposed | 1511    | 476      | 703     | BP-47591 | LCSET-4899 | TrueSeq.v1 |
| GTEX-145ME-1826-SM-5SI9G | 0        | B1       | 7.5   | Skin - Sun Exposed | 1511    | 315      | 951     | BP-47616 | LCSET-5174 | TrueSeq.v1 |
| GTEX-145MF-0626-SM-5LUAI | 0        | B1       | 6.3   | Skin - Sun Exposed | 1511    | 934      | 985     | BP-47616 | LCSET-4899 | TrueSeq.v1 |
| GTEX-145MI-0526-SM-5O9A8 | 0        | B1       | 7.8   | Skin - Sun Exposed | 1511    | 702      | 893     | BP-47696 | LCSET-4909 | TrueSeq.v1 |
| GTEX-145MN-2226-SM-5SIAU | 1        | B1       | 6.6   | Skin - Sun Exposed | 1511    | 237      | 620     | BP-47616 | LCSET-5174 | TrueSeq.v1 |
| GTEX-145MO-0326-SM-5Q5B3 | 0        | C1       | 7.6   | Skin - Sun Exposed | 1511    | 658      | 512     | BP-48437 | LCSET-4952 | TrueSeq.v1 |
| GTEX-146FH-0126-SM-5QGPP | 1        | C1       | 8.1   | Skin - Sun Exposed | 1511    | 396      | 643     | BP-48068 | LCSET-4954 | TrueSeq.v1 |
| GTEX-146FQ-0126-SM-5NQA9 | 1        | B1       | 6.3   | Skin - Sun Exposed | 1511    | 474      | 817     | BP-47696 | LCSET-4907 | TrueSeq.v1 |
| GTEX-146FR-1326-SM-5SIAJ | 0        | B1       | 8     | Skin - Sun Exposed | 1511    | 1635     | 809     | BP-47616 | LCSET-5174 | TrueSeq.v1 |
| GTEX-14753-0426-SM-5NQAM | 1        | B1       | 5.9   | Skin - Sun Exposed | 1511    | 808      | 820     | BP-47696 | LCSET-4907 | TrueSeq.v1 |
| GTEX-147F3-0526-SM-5SI98 | 1        | B1       | 7     | Skin - Sun Exposed | 1511    | 486      | 1349    | BP-47616 | LCSET-5174 | TrueSeq.v1 |
| GTEX-147F4-0226-SM-5QGPW | 0        | B1       | 7     | Skin - Sun Exposed | 1511    | 1225     | 585     | BP-48068 | LCSET-4954 | TrueSeq.v1 |
| GTEX-147GR-0526-SM-5S2MY | 0        | B1       | 7     | Skin - Sun Exposed | 1511    | 999      | 871     | BP-48564 | LCSET-4988 | TrueSeq.v1 |
| GTEX-148VI-1626-SM-5SI6E | 1        | B1       | 7.2   | Skin - Sun Exposed | 1511    | 417      | 1038    | BP-48651 | LCSET-4995 | TrueSeq.v1 |
| GTEX-14A5H-0426-SM-5QGQF | 0        | B1       | 7.3   | Skin - Sun Exposed | 1511    | 525      | 575     | BP-48437 | LCSET-4954 | TrueSeq.v1 |
| GTEX-14A6H-0126-SM-5QGPK | 0        | B1       | 6.5   | Skin - Sun Exposed | 1511    | 477      | 749     | BP-48068 | LCSET-4954 | TrueSeq.v1 |
| GTEX-14BIL-0126-SM-5SI92 | 1        | B1       | 8.2   | Skin - Sun Exposed | 1511    | 759      | 847     | BP-47656 | LCSET-5174 | TrueSeq.v1 |
| GTEX-14BMV-0126-SM-5S2PO | 1        | C1       | 8.1   | Skin - Sun Exposed | 1511    | 591      | 1159    | BP-48647 | LCSET-4988 | TrueSeq.v1 |
| GTEX-14C5O-0126-SM-5SI6N | 1        | C1       | 7.9   | Skin - Sun Exposed | 1511    | 654      | 511     | BP-48651 | LCSET-4995 | TrueSeq.v1 |
| GTEX-14DAQ-0126-SM-5S2MQ | 0        | C1       | 8     | Skin - Sun Exposed | 1511    | 448      | 628     | BP-48576 | LCSET-4988 | TrueSeq.v1 |
| GTEX-14DAR-2026-SM-5S2O3 | 0        | B1       | 7.2   | Skin - Sun Exposed | 1511    | 250      | 619     | BP-48576 | LCSET-4988 | TrueSeq.v1 |
| GTEX-14E6C-0126-SM-5RQIP | 1        | C1       | 7.3   | Skin - Sun Exposed | 1511    | 981      | 410     | BP-48576 | LCSET-4955 | TrueSeq.v1 |
| GTEX-14E6E-1826-SM-5S2R7 | 0        | B1       | 7.3   | Skin - Sun Exposed | 1511    | 395      | 381     | BP-48651 | LCSET-4988 | TrueSeq.v1 |
| GTEX-N7MS-0225-SM-4E3HO  | 1        | C1       | 7.7   | Skin - Sun Exposed | 1511    | 1180     | 1563    | BP-36182 | LCSET-3416 | TrueSeq.v1 |

| SAMPID                  | SMATSSCR | SMCENTER | SMRIN | SMTSD              | SMUBRID | SMTSISCH | SMTSPAX | SMNABTCH | SMGEBTCH                | SMGEBTCHT             |
|-------------------------|----------|----------|-------|--------------------|---------|----------|---------|----------|-------------------------|-----------------------|
| GTEX-NFK9-0226-SM-2AXU5 | 0        | C1       | 9.6   | Skin - Sun Exposed | 1511    | 294      | 1569    | BP-16993 | GTEXDonor1-20_Sept2011  | Affymetrix Expression |
| GTEX-NFK9-0226-SM-2HMKQ | 0        | C1       | 9.6   | Skin - Sun Exposed | 1511    | 294      | 1569    | BP-16993 | LCSET-1156_2            | TrueSeq.v1            |
| GTEX-NPJ8-0126-SM-2QU56 | 0        | D1       | 7.5   | Skin - Sun Exposed | 1511    | 311      | 1635    | BP-17314 | GTEX_AffyBatch5_March12 | Affymetrix Expression |
| GTEX-NPJ8-0126-SM-2YUNR | 0        | D1       | 7.5   | Skin - Sun Exposed | 1511    | 311      | 1635    | BP-17314 | LCSET-1433              | TrueSeq.v1            |
| GTEX-O5YT-0126-SM-48TBW | 0        | B1       | 5.9   | Skin - Sun Exposed | 1511    | 242      | 1588    | BP-17532 | LCSET-3085              | TrueSeq.v1            |
| GTEX-O5YW-0126-SM-2D45C | 0        | B1       | 5.4   | Skin - Sun Exposed | 1511    | 194      | 1582    | BP-17669 | GTEX_96Affy3_Oct2011    | Affymetrix Expression |
| GTEX-O5YW-0126-SM-3LK6D | 0        | B1       | 5.4   | Skin - Sun Exposed | 1511    | 194      | 1582    | BP-17669 | LCSET-2234              | TrueSeq.v1            |
| GTEX-OHPJ-0226-SM-2D45E | 0        | C1       | 5.5   | Skin - Sun Exposed | 1511    | 406      | 1560    | BP-17749 | GTEX_96Affy3_Oct2011    | Affymetrix Expression |
| GTEX-OHPL-0126-SM-2AXUS | 0        | B1       | 7.1   | Skin - Sun Exposed | 1511    | 189      | 1563    | BP-17822 | GTEXDonor1-20_Sept2011  | Affymetrix Expression |
| GTEX-OHPL-0126-SM-2HMJ7 | 0        | B1       | 7.1   | Skin - Sun Exposed | 1511    | 189      | 1563    | BP-17822 | LCSET-1156_1            | TrueSeq.v1            |
| GTEX-OHPM-0126-SM-2QU3F | 0        | B1       | 6.1   | Skin - Sun Exposed | 1511    | 149      | 1649    | BP-20384 | GTEX_AffyBatch5_March12 | Affymetrix Expression |
| GTEX-OHPM-0126-SM-2YUN9 | 0        | B1       | 6.1   | Skin - Sun Exposed | 1511    | 149      | 1649    | BP-20384 | LCSET-1433              | TrueSeq.v1            |
| GTEX-OIZF-0126-SM-2AXUE | 0        | B1       | 7.8   | Skin - Sun Exposed | 1511    | 215      | 256     | BP-18080 | GTEXDonor1-20_Sept2011  | Affymetrix Expression |
| GTEX-OIZG-0726-SM-2AXUL | 0        | C1       | 5.9   | Skin - Sun Exposed | 1511    | 730      | 241     | BP-18122 | GTEXDonor1-20_Sept2011  | Affymetrix Expression |
| GTEX-OIZG-0726-SM-2I5GS | 0        | C1       | 5.9   | Skin - Sun Exposed | 1511    | 730      | 241     | BP-18122 | LCSET-1168_5            | TrueSeq.v1            |
| GTEX-OIZG-0726-SM-33HBL | 0        | C1       | 5.9   | Skin - Sun Exposed | 1511    | 730      | 241     | BP-18122 | LCSET-1668              | TrueSeq.v1            |
| GTEX-OIZH-0126-SM-2D44Z | 0        | B1       | 6.6   | Skin - Sun Exposed | 1511    | 219      | 294     | BP-18147 | GTEX_96Affy3_Oct2011    | Affymetrix Expression |
| GTEX-OIZH-0126-SM-2HMIS | 0        | B1       | 6.6   | Skin - Sun Exposed | 1511    | 219      | 294     | BP-18147 | LCSET-1156_1            | TrueSeq.v1            |
| GTEX-OOBK-0126-SM-2QU3Y | 1        | B1       | 7.2   | Skin - Sun Exposed | 1511    | 261      | 731     | BP-20384 | GTEX_AffyBatch5_March12 | Affymetrix Expression |
| GTEX-OOBK-0126-SM-2YUND | 1        | B1       | 7.2   | Skin - Sun Exposed | 1511    | 261      | 731     | BP-20384 | LCSET-1433              | TrueSeq.v1            |
| GTEX-OXRK-0226-SM-2M485 | 1        | C1       | 6.7   | Skin - Sun Exposed | 1511    | 280      | 240     | BP-20384 | GTEX_Batch4Affy_Jan2012 | Affymetrix Expression |
| GTEX-OXRK-0226-SM-2YUN1 | 1        | C1       | 6.7   | Skin - Sun Exposed | 1511    | 280      | 240     | BP-20384 | LCSET-1433              | TrueSeq.v1            |
| GTEX-OXRK-0226-SM-3NB2G | 1        | C1       | 6.7   | Skin - Sun Exposed | 1511    | 280      | 240     | BP-20384 | LCSET-2318              | TrueSeq.v1            |
| GTEX-OXRL-0126-SM-2M47I | 1        | B1       | 6     | Skin - Sun Exposed | 1511    | 312      | 852     | BP-18390 | GTEX_Batch4Affy_Jan2012 | Affymetrix Expression |
| GTEX-OXRL-0126-SM-2YUMP | 1        | B1       | 6     | Skin - Sun Exposed | 1511    | 312      | 852     | BP-18390 | LCSET-1433              | TrueSeq.v1            |

| SAMPID                  | SMATSSCR | SMCENTER | SMRIN | SMTSD              | SMUBRID | SMTSISCH | SMTSPAX | SMNABTCH | SMGEBTCH                             | SMGEBTCHT             |
|-------------------------|----------|----------|-------|--------------------|---------|----------|---------|----------|--------------------------------------|-----------------------|
| GTEX-OXRN-0126-SM-48TDM | 1        | C1       | 8.6   | Skin - Sun Exposed | 1511    | 572      | 364     | BP-29826 | LCSET-3085                           | TrueSeq.v1            |
| GTEX-OXRO-0126-SM-2M48E | 1        | D1       | 7     | Skin - Sun Exposed | 1511    | 835      | 1179    | BP-18448 | GTE <sub>x</sub> _Batch4Affy_Jan2012 | Affymetrix Expression |
| GTEX-OXRO-0126-SM-2YUN4 | 1        | D1       | 7     | Skin - Sun Exposed | 1511    | 835      | 1179    | BP-18448 | LCSET-1433                           | TrueSeq.v1            |
| GTEX-OXRP-0126-SM-3NB32 | 1        | C1       | 8.4   | Skin - Sun Exposed | 1511    | 1063     | 240     | BP-29826 | LCSET-2318                           | TrueSeq.v1            |
| GTEX-OXRP-0126-SM-48TDI | 1        | C1       | 8.4   | Skin - Sun Exposed | 1511    | 1063     | 240     | BP-29826 | LCSET-3085                           | TrueSeq.v1            |
| GTEX-P44G-0226-SM-2D44P | 1        | C1       | 6.3   | Skin - Sun Exposed | 1511    | 667      | 248     | BP-18460 | GTE <sub>x</sub> _96Affy3_Oct2011    | Affymetrix Expression |
| GTEX-P44G-0226-SM-2I3F3 | 1        | C1       | 6.3   | Skin - Sun Exposed | 1511    | 667      | 248     | BP-18460 | LCSET-1167_4                         | TrueSeq.v1            |
| GTEX-P44H-0226-SM-2XCEU | 1        | C1       | 7     | Skin - Sun Exposed | 1511    | 458      | 461     | BP-18616 | LCSET-1562                           | TrueSeq.v1            |
| GTEX-P44H-0226-SM-2XV67 | 1        | C1       | 7     | Skin - Sun Exposed | 1511    | 458      | 461     | BP-18616 | GTE <sub>x</sub> _AffyBatch9_May12   | Affymetrix Expression |
| GTEX-P4PP-0126-SM-2D442 | 1        | B1       | 6.1   | Skin - Sun Exposed | 1511    | 196      | 854     | BP-18662 | GTE <sub>x</sub> _96Affy3_Oct2011    | Affymetrix Expression |
| GTEX-P4PP-0126-SM-3LK69 | 1        | B1       | 6.1   | Skin - Sun Exposed | 1511    | 196      | 854     | BP-18662 | LCSET-2234                           | TrueSeq.v1            |
| GTEX-P4PQ-0126-SM-2M47B | 1        | B1       | 6     | Skin - Sun Exposed | 1511    | 235      | 1220    | BP-18708 | GTE <sub>x</sub> _Batch4Affy_Jan2012 | Affymetrix Expression |
| GTEX-P4PQ-0126-SM-2S1NM | 1        | B1       | 6     | Skin - Sun Exposed | 1511    | 235      | 1220    | BP-18708 | LCSET-1464                           | TrueSeq.v1            |
| GTEX-P4QR-0326-SM-2M47P | 1        | C1       | 6.2   | Skin - Sun Exposed | 1511    | 411      | 712     | BP-18830 | GTE <sub>x</sub> _Batch4Affy_Jan2012 | Affymetrix Expression |
| GTEX-P4QR-0326-SM-2S1NU | 1        | C1       | 6.2   | Skin - Sun Exposed | 1511    | 411      | 712     | BP-18830 | LCSET-1464                           | TrueSeq.v1            |
| GTEX-P4QR-0326-SM-5S18P | 1        | C1       | 6.2   | Skin - Sun Exposed | 1511    | 411      | 712     | BP-18830 | LCSET-4995                           | TrueSeq.v1            |
| GTEX-P4QT-0126-SM-2I3FL | 1        | B1       | 6.3   | Skin - Sun Exposed | 1511    | 212      | 369     | BP-18729 | LCSET-1167_3                         | TrueSeq.v1            |
| GTEX-PLZ4-0126-SM-2QU4D | 1        | C1       | 6.1   | Skin - Sun Exposed | 1511    | 652      | 843     | BP-19215 | GTE <sub>x</sub> _AffyBatch5_March12 | Affymetrix Expression |
| GTEX-PLZ4-0126-SM-2S1OG | 1        | C1       | 6.1   | Skin - Sun Exposed | 1511    | 652      | 843     | BP-19215 | LCSET-1464                           | TrueSeq.v1            |
| GTEX-PLZ4-0126-SM-5S18O | 1        | C1       | 6.1   | Skin - Sun Exposed | 1511    | 652      | 843     | BP-19215 | LCSET-4995                           | TrueSeq.v1            |
| GTEX-PLZ5-2026-SM-2M48B | 1        | B1       | 6.7   | Skin - Sun Exposed | 1511    | 210      | 1146    | BP-19182 | GTE <sub>x</sub> _Batch4Affy_Jan2012 | Affymetrix Expression |
| GTEX-PLZ5-2026-SM-2S1O4 | 1        | B1       | 6.7   | Skin - Sun Exposed | 1511    | 210      | 1146    | BP-19182 | LCSET-1464                           | TrueSeq.v1            |
| GTEX-PLZ6-1426-SM-2QU4V | 1        | B1       | 7     | Skin - Sun Exposed | 1511    | 231      | 1131    | BP-19256 | GTE <sub>x</sub> _AffyBatch5_March12 | Affymetrix Expression |
| GTEX-PLZ6-1426-SM-2S1OQ | 1        | B1       | 7     | Skin - Sun Exposed | 1511    | 231      | 1131    | BP-19256 | LCSET-1464                           | TrueSeq.v1            |
| GTEX-PLZ6-1426-SM-5S2TR | 1        | B1       | 7     | Skin - Sun Exposed | 1511    | 231      | 1131    | BP-19256 | LCSET-4996                           | TrueSeq.v1            |

| SAMPID                  | SMATSSCR | SMCENTER | SMRIN | SMTSD              | SMUBRID | SMTSISCH | SMTSPAX | SMNABTCH | SMGEBTCH                 | SMGEBTCHT             |
|-------------------------|----------|----------|-------|--------------------|---------|----------|---------|----------|--------------------------|-----------------------|
| GTEX-POMQ-2226-SM-2I5FK | 0        | B1       | 7.1   | Skin - Sun Exposed | 1511    | 362      | 1308    | BP-19351 | LCSET-1168_5             | TrueSeq.v1            |
| GTEX-POMQ-2226-SM-2M48S | 0        | B1       | 7.1   | Skin - Sun Exposed | 1511    | 362      | 1308    | BP-19351 | GTEEx_Batch4Affy_Jan2012 | Affymetrix Expression |
| GTEX-PSDG-0226-SM-2I5FR | 0        | C1       | 7.4   | Skin - Sun Exposed | 1511    | 411      | 1337    | BP-19411 | LCSET-1168_5             | TrueSeq.v1            |
| GTEX-PSDG-0226-SM-2M48X | 0        | C1       | 7.4   | Skin - Sun Exposed | 1511    | 411      | 1337    | BP-19411 | GTEEx_Batch4Affy_Jan2012 | Affymetrix Expression |
| GTEX-PSDG-0226-SM-33HC1 | 0        | C1       | 7.4   | Skin - Sun Exposed | 1511    | 411      | 1337    | BP-19411 | LCSET-1668               | TrueSeq.v1            |
| GTEX-PVOW-0126-SM-2XCFA | 1        | C1       | 7.6   | Skin - Sun Exposed | 1511    | 634      | 832     | BP-19441 | LCSET-1562               | TrueSeq.v1            |
| GTEX-PVOW-0126-SM-2XV68 | 1        | C1       | 7.6   | Skin - Sun Exposed | 1511    | 634      | 832     | BP-19441 | GTEEx_AffyBatch9_May12   | Affymetrix Expression |
| GTEX-PW2O-1526-SM-2I2JD | 1        | B1       | 5.5   | Skin - Sun Exposed | 1511    | 278      | 1299    | BP-19459 | GTEEx_Batch3Affy_Dec2011 | Affymetrix Expression |
| GTEX-PWCY-1826-SM-2QU4P | 1        | B1       | 6.2   | Skin - Sun Exposed | 1511    | 281      | 747     | BP-19461 | GTEEx_AffyBatch5_March12 | Affymetrix Expression |
| GTEX-PWCY-1826-SM-2S1OK | 1        | B1       | 6.2   | Skin - Sun Exposed | 1511    | 281      | 747     | BP-19461 | LCSET-1464               | TrueSeq.v1            |
| GTEX-PWCY-1826-SM-5S17U | 1        | B1       | 6.2   | Skin - Sun Exposed | 1511    | 281      | 747     | BP-19461 | LCSET-4995               | TrueSeq.v1            |
| GTEX-PWN1-0126-SM-2I3FK | 1        | B1       | 7.3   | Skin - Sun Exposed | 1511    | 212      | 1078    | BP-19817 | LCSET-1167_4             | TrueSeq.v1            |
| GTEX-PWN1-0126-SM-2I2IM | 1        | B1       | 7.3   | Skin - Sun Exposed | 1511    | 212      | 1078    | BP-19817 | GTEEx_Batch3Affy_Dec2011 | Affymetrix Expression |
| GTEX-PWO3-1526-SM-48TCM | 1        | D1       | 5.9   | Skin - Sun Exposed | 1511    | 1290     | 1187    | BP-19825 | LCSET-3085               | TrueSeq.v1            |
| GTEX-PX3G-0126-SM-2I3EN | 1        | B1       | 7.5   | Skin - Sun Exposed | 1511    | 247      | 373     | BP-19882 | LCSET-1167_3             | TrueSeq.v1            |
| GTEX-PX3G-0126-SM-2I2IC | 1        | B1       | 7.5   | Skin - Sun Exposed | 1511    | 247      | 373     | BP-19882 | GTEEx_Batch3Affy_Dec2011 | Affymetrix Expression |
| GTEX-Q2AG-0126-SM-2HMLB | 1        | C1       | 7.4   | Skin - Sun Exposed | 1511    | 696      | 1171    | BP-19901 | LCSET-1156_2             | TrueSeq.v1            |
| GTEX-Q2AG-0126-SM-2I2JX | 1        | C1       | 7.4   | Skin - Sun Exposed | 1511    | 696      | 1171    | BP-19901 | GTEEx_Batch3Affy_Dec2011 | Affymetrix Expression |
| GTEX-Q2AG-0126-SM-33HBV | 1        | C1       | 7.4   | Skin - Sun Exposed | 1511    | 696      | 1171    | BP-19901 | LCSET-1668               | TrueSeq.v1            |
| GTEX-Q2AH-1626-SM-2QU36 | 1        | B1       | 6.9   | Skin - Sun Exposed | 1511    | 186      | 1120    | BP-20000 | GTEEx_AffyBatch5_March12 | Affymetrix Expression |
| GTEX-Q2AH-1626-SM-3GAF8 | 1        | B1       | 6.9   | Skin - Sun Exposed | 1511    | 186      | 1120    | BP-20000 | LCSET-2015               | TrueSeq.v1            |
| GTEX-Q2AI-1326-SM-2QU4I | 1        | B1       | 7.3   | Skin - Sun Exposed | 1511    | 185      | 558     | BP-20043 | GTEEx_AffyBatch5_March12 | Affymetrix Expression |
| GTEX-Q2AI-1326-SM-2S1PL | 1        | B1       | 7.3   | Skin - Sun Exposed | 1511    | 185      | 558     | BP-20043 | LCSET-1465               | TrueSeq.v1            |
| GTEX-Q734-1926-SM-2I5EV | 0        | B1       | 5.4   | Skin - Sun Exposed | 1511    | 130      | 1066    | BP-20047 | LCSET-1168_5             | TrueSeq.v1            |
| GTEX-Q734-1926-SM-2I2IV | 0        | B1       | 5.4   | Skin - Sun Exposed | 1511    | 130      | 1066    | BP-20047 | GTEEx_Batch3Affy_Dec2011 | Affymetrix Expression |

| SAMPID                  | SMATSSCR | SMCENTER | SMRIN | SMTSD              | SMUBRID | SMTSISCH | SMTSPAX | SMNABTCH | SMGEBTCH                 | SMGEBTCHT             |
|-------------------------|----------|----------|-------|--------------------|---------|----------|---------|----------|--------------------------|-----------------------|
| GTEX-QCQG-1726-SM-2QU57 | 1        | B1       | 6.7   | Skin - Sun Exposed | 1511    | 298      | 989     | BP-20114 | GTEX_AffyBatch5_March12  | Affymetrix Expression |
| GTEX-QCQG-1726-SM-3GIJ9 | 1        | B1       | 6.7   | Skin - Sun Exposed | 1511    | 298      | 989     | BP-20114 | LCSET-2024               | TrueSeq.v1            |
| GTEX-QDT8-0126-SM-48TZ1 | 1        | C1       | 5.9   | Skin - Sun Exposed | 1511    | 446      | 731     | BP-20205 | LCSET-3084               | TrueSeq.v1            |
| GTEX-QDVJ-1726-SM-2I5FX | 1        | C1       | 6.5   | Skin - Sun Exposed | 1511    | 535      | 393     | BP-20260 | LCSET-1168_6             | TrueSeq.v1            |
| GTEX-QDVJ-1726-SM-2M492 | 1        | C1       | 6.5   | Skin - Sun Exposed | 1511    | 535      | 393     | BP-20260 | GTEEx_Batch4Affy_Jan2012 | Affymetrix Expression |
| GTEX-QDVN-2026-SM-2QU4I | 1        | B1       | 6     | Skin - Sun Exposed | 1511    | 260      | 771     | BP-20294 | GTEX_AffyBatch5_March12  | Affymetrix Expression |
| GTEX-QDVN-2026-SM-3GAEP | 1        | B1       | 6     | Skin - Sun Exposed | 1511    | 260      | 771     | BP-20294 | LCSET-2015               | TrueSeq.v1            |
| GTEX-QEG4-0226-SM-2QU52 | 1        | C1       | 7.3   | Skin - Sun Exposed | 1511    | 893      | 1099    | BP-20319 | GTEX_AffyBatch5_March12  | Affymetrix Expression |
| GTEX-QEG4-0226-SM-2S1PY | 1        | C1       | 7.3   | Skin - Sun Exposed | 1511    | 893      | 1099    | BP-20319 | LCSET-1465               | TrueSeq.v1            |
| GTEX-QEG5-0226-SM-2I5GI | 1        | C1       | 7.3   | Skin - Sun Exposed | 1511    | 590      | 808     | BP-20333 | LCSET-1168_5             | TrueSeq.v1            |
| GTEX-QEG5-0226-SM-2M49K | 1        | C1       | 7.3   | Skin - Sun Exposed | 1511    | 590      | 808     | BP-20333 | GTEEx_Batch4Affy_Jan2012 | Affymetrix Expression |
| GTEX-QEL4-0226-SM-2TAWW | 1        | C1       | 7.5   | Skin - Sun Exposed | 1511    | 476      | 1387    | BP-20412 | GTEEx_Affy_Batch7_Apr12  | Affymetrix Expression |
| GTEX-QESD-1426-SM-2QU4L | 1        | B1       | 6.8   | Skin - Sun Exposed | 1511    | 326      | 1313    | BP-20481 | GTEX_AffyBatch5_March12  | Affymetrix Expression |
| GTEX-QESD-1426-SM-2S1R9 | 1        | B1       | 6.8   | Skin - Sun Exposed | 1511    | 326      | 1313    | BP-20481 | LCSET-1466               | TrueSeq.v1            |
| GTEX-QLQ7-1626-SM-2QU45 | 1        | B1       | 6.6   | Skin - Sun Exposed | 1511    | 178      | 563     | BP-20571 | GTEX_AffyBatch5_March12  | Affymetrix Expression |
| GTEX-QLQ7-1626-SM-2S1R8 | 1        | B1       | 6.6   | Skin - Sun Exposed | 1511    | 178      | 563     | BP-20571 | LCSET-1466               | TrueSeq.v1            |
| GTEX-QLQW-1126-SM-2S1Q8 | 1        | B1       | 7.3   | Skin - Sun Exposed | 1511    | 159      | 1087    | BP-20691 | LCSET-1466               | TrueSeq.v1            |
| GTEX-QLQW-1126-SM-2TO72 | 1        | B1       | 7.3   | Skin - Sun Exposed | 1511    | 159      | 1087    | BP-20691 | GTEX_Affy_Batch6_Apr12   | Affymetrix Expression |
| GTEX-QV44-1926-SM-2S1RF | 1        | B1       | 6.4   | Skin - Sun Exposed | 1511    | 196      | 954     | BP-20869 | LCSET-1466               | TrueSeq.v1            |
| GTEX-QV44-1926-SM-2TO4T | 1        | B1       | 6.4   | Skin - Sun Exposed | 1511    | 196      | 954     | BP-20869 | GTEX_Affy_Batch6_Apr12   | Affymetrix Expression |
| GTEX-QVJO-1626-SM-2S1QW | 1        | D1       | 6.5   | Skin - Sun Exposed | 1511    | 1222     | 1052    | BP-20981 | LCSET-1466               | TrueSeq.v1            |
| GTEX-QVJO-1626-SM-2TO5E | 1        | D1       | 6.5   | Skin - Sun Exposed | 1511    | 1222     | 1052    | BP-20981 | GTEX_Affy_Batch6_Apr12   | Affymetrix Expression |
| GTEX-R3RS-0126-SM-2TO5G | 1        | C1       | 6.6   | Skin - Sun Exposed | 1511    | 1151     | 755     | BP-21198 | GTEX_Affy_Batch6_Apr12   | Affymetrix Expression |
| GTEX-R3RS-0126-SM-3GIJL | 1        | C1       | 6.6   | Skin - Sun Exposed | 1511    | 1151     | 755     | BP-21198 | LCSET-2024               | TrueSeq.v1            |
| GTEX-R55D-0226-SM-2TWBG | 0        | C1       | 6.1   | Skin - Sun Exposed | 1511    | 360      | 1166    | BP-21287 | GTEEx_Affy_Batch7_Apr12  | Affymetrix Expression |

| SAMPID                  | SMATSSCR | SMCENTER | SMRIN | SMTSD              | SMUBRID | SMTSISCH | SMTSPAX | SMNABTCH | SMGEBTCH               | SMGEBTCHT             |
|-------------------------|----------|----------|-------|--------------------|---------|----------|---------|----------|------------------------|-----------------------|
| GTEX-R55E-0126-SM-2TC5Y | 1        | C1       | 7.6   | Skin - Sun Exposed | 1511    | 924      | 1258    | BP-21443 | LCSET-1477             | TrueSeq.v1            |
| GTEX-R55E-0126-SM-2TO6U | 1        | C1       | 7.6   | Skin - Sun Exposed | 1511    | 924      | 1258    | BP-21443 | GTEX_Affy_Batch6_Apr12 | Affymetrix Expression |
| GTEX-R55F-0126-SM-48FCK | 1        | D1       | 5.8   | Skin - Sun Exposed | 1511    | 1287     | 1129    | BP-21404 | LCSET-3057             | TrueSeq.v1            |
| GTEX-R55G-2526-SM-2TC6D | 0        | B1       | 7     | Skin - Sun Exposed | 1511    | 189      | 729     | BP-21547 | LCSET-1477             | TrueSeq.v1            |
| GTEX-RM2N-1426-SM-2TF4H | 0        | B1       | 6.5   | Skin - Sun Exposed | 1511    | 227      | 1020    | BP-21576 | LCSET-1479             | TrueSeq.v1            |
| GTEX-RM2N-1426-SM-2TO53 | 0        | B1       | 6.5   | Skin - Sun Exposed | 1511    | 227      | 1020    | BP-21576 | GTEX_Affy_Batch6_Apr12 | Affymetrix Expression |
| GTEX-RN64-0126-SM-2TC68 | 1        | C1       | 7.2   | Skin - Sun Exposed | 1511    | 676      | 1113    | BP-21626 | LCSET-1477             | TrueSeq.v1            |
| GTEX-RN64-0126-SM-2TO55 | 1        | C1       | 7.2   | Skin - Sun Exposed | 1511    | 676      | 1113    | BP-21626 | GTEX_Affy_Batch6_Apr12 | Affymetrix Expression |
| GTEX-RNOR-0126-SM-2TF57 | 1        | C1       | 7.4   | Skin - Sun Exposed | 1511    | 827      | 636     | BP-21668 | LCSET-1479             | TrueSeq.v1            |
| GTEX-RNOR-0126-SM-2TWAZ | 1        | C1       | 7.4   | Skin - Sun Exposed | 1511    | 827      | 636     | BP-21668 | GTEX_Affy_Batch7_Apr12 | Affymetrix Expression |
| GTEX-RTLS-0126-SM-447CA | 1        | C1       | 5.9   | Skin - Sun Exposed | 1511    | 632      | 783     | BP-21669 | LCSET-2912             | TrueSeq.v1            |
| GTEX-RU72-0926-SM-2TF6B | 0        | C1       | 6.8   | Skin - Sun Exposed | 1511    | 457      | 1399    | BP-21837 | LCSET-1480             | TrueSeq.v1            |
| GTEX-RU72-0926-SM-2TWAP | 0        | C1       | 6.8   | Skin - Sun Exposed | 1511    | 457      | 1399    | BP-21837 | GTEX_Affy_Batch7_Apr12 | Affymetrix Expression |
| GTEX-RUSQ-1526-SM-2TF62 | 0        | B1       | 6.2   | Skin - Sun Exposed | 1511    | 288      | 1178    | BP-21934 | LCSET-1480             | TrueSeq.v1            |
| GTEX-RUSQ-1526-SM-2TWBQ | 0        | B1       | 6.2   | Skin - Sun Exposed | 1511    | 288      | 1178    | BP-21934 | GTEX_Affy_Batch7_Apr12 | Affymetrix Expression |
| GTEX-RVPU-2226-SM-2XCAQ | 1        | C1       | 7.2   | Skin - Sun Exposed | 1511    | 1431     | 1327    | BP-22343 | LCSET-1559             | TrueSeq.v1            |
| GTEX-RVPU-2226-SM-2XU9A | 1        | C1       | 7.2   | Skin - Sun Exposed | 1511    | 1431     | 1327    | BP-22343 | GTEX_AffyBatch8_May12  | Affymetrix Expression |
| GTEX-RWS6-2026-SM-2XCB5 | 1        | B1       | 6.6   | Skin - Sun Exposed | 1511    | 235      | 895     | BP-22521 | LCSET-1559             | TrueSeq.v1            |
| GTEX-RWS6-2026-SM-2XU8X | 1        | B1       | 6.6   | Skin - Sun Exposed | 1511    | 235      | 895     | BP-22521 | GTEX_AffyBatch8_May12  | Affymetrix Expression |
| GTEX-RWSA-0126-SM-2XCBB | 0        | C1       | 8     | Skin - Sun Exposed | 1511    | 1284     | 1425    | BP-22521 | LCSET-1559             | TrueSeq.v1            |
| GTEX-RWSA-0126-SM-2XU9X | 0        | C1       | 8     | Skin - Sun Exposed | 1511    | 1284     | 1425    | BP-22521 | GTEX_AffyBatch8_May12  | Affymetrix Expression |
| GTEX-S32W-2126-SM-2XCB1 | 1        | B1       | 7.9   | Skin - Sun Exposed | 1511    | 393      | 842     | BP-22722 | LCSET-1559             | TrueSeq.v1            |
| GTEX-S32W-2126-SM-2XU8S | 1        | B1       | 7.9   | Skin - Sun Exposed | 1511    | 393      | 842     | BP-22722 | GTEX_AffyBatch8_May12  | Affymetrix Expression |
| GTEX-S341-1726-SM-2XU8C | 0        | B1       | 6.1   | Skin - Sun Exposed | 1511    | 224      | 985     | BP-22843 | GTEX_AffyBatch8_May12  | Affymetrix Expression |
| GTEX-S341-1726-SM-3K2AK | 0        | B1       | 6.1   | Skin - Sun Exposed | 1511    | 224      | 985     | BP-22843 | LCSET-2147             | TrueSeq.v1            |

| SAMPID                  | SMATSSCR | SMCENTER | SMRIN | SMTSD              | SMUBRID | SMTSISCH | SMTSPAX | SMNABTCH | SMGEBTCH                          | SMGEBTCHT             |
|-------------------------|----------|----------|-------|--------------------|---------|----------|---------|----------|-----------------------------------|-----------------------|
| GTEX-S3XE-1726-SM-2XU9F | 0        | B1       | 7.8   | Skin - Sun Exposed | 1511    | 207      | 375     | BP-22893 | GTE <sub>x</sub> AffyBatch8_May12 | Affymetrix Expression |
| GTEX-S3XE-1726-SM-3K2AM | 0        | B1       | 7.8   | Skin - Sun Exposed | 1511    | 207      | 375     | BP-22893 | LCSET-2147                        | TrueSeq.v1            |
| GTEX-S4UY-0126-SM-2XU9R | 0        | C1       | 7.4   | Skin - Sun Exposed | 1511    | 323      | 750     | BP-22873 | GTE <sub>x</sub> AffyBatch8_May12 | Affymetrix Expression |
| GTEX-S4UY-0126-SM-3K2BB | 0        | C1       | 7.4   | Skin - Sun Exposed | 1511    | 323      | 750     | BP-22873 | LCSET-2147                        | TrueSeq.v1            |
| GTEX-S7PM-0126-SM-4AD6S | 1        | C1       | 7.2   | Skin - Sun Exposed | 1511    | 1266     | 1177    | BP-23146 | LCSET-3098                        | TrueSeq.v1            |
| GTEX-S7SE-0126-SM-2XCD5 | 1        | C1       | 6.8   | Skin - Sun Exposed | 1511    | 936      | 1233    | BP-23169 | LCSET-1561                        | TrueSeq.v1            |
| GTEX-S7SE-0126-SM-2XV4Z | 1        | C1       | 6.8   | Skin - Sun Exposed | 1511    | 936      | 1233    | BP-23169 | GTE <sub>x</sub> AffyBatch9_May12 | Affymetrix Expression |
| GTEX-S7SF-1626-SM-2XU9K | 1        | B1       | 6.8   | Skin - Sun Exposed | 1511    | 339      | 754     | BP-23171 | GTE <sub>x</sub> AffyBatch8_May12 | Affymetrix Expression |
| GTEX-S7SF-1626-SM-3K2AY | 1        | B1       | 6.8   | Skin - Sun Exposed | 1511    | 339      | 754     | BP-23171 | LCSET-2147                        | TrueSeq.v1            |
| GTEX-S95S-1226-SM-4GICG | 0        | B1       | 5.8   | Skin - Sun Exposed | 1511    | 275      | 1011    | BP-23283 | LCSET-3479                        | TrueSeq.v1            |
| GTEX-SIU7-1726-SM-2XCDZ | 1        | B1       | 7.1   | Skin - Sun Exposed | 1511    | 168      | 979     | BP-23467 | LCSET-1561                        | TrueSeq.v1            |
| GTEX-SIU7-1726-SM-2XV4K | 1        | B1       | 7.1   | Skin - Sun Exposed | 1511    | 168      | 979     | BP-23467 | GTE <sub>x</sub> AffyBatch9_May12 | Affymetrix Expression |
| GTEX-SIU8-0126-SM-2XCDT | 1        | C1       | 6.2   | Skin - Sun Exposed | 1511    | 1231     | 1063    | BP-23696 | LCSET-1561                        | TrueSeq.v1            |
| GTEX-SIU8-0126-SM-2XV58 | 1        | C1       | 6.2   | Skin - Sun Exposed | 1511    | 1231     | 1063    | BP-23696 | GTE <sub>x</sub> AffyBatch9_May12 | Affymetrix Expression |
| GTEX-SJXC-0126-SM-2XCFF | 1        | C1       | 7.4   | Skin - Sun Exposed | 1511    | 973      | 753     | BP-23696 | LCSET-1562                        | TrueSeq.v1            |
| GTEX-SJXC-0126-SM-2XV4I | 1        | C1       | 7.4   | Skin - Sun Exposed | 1511    | 973      | 753     | BP-23696 | GTE <sub>x</sub> AffyBatch9_May12 | Affymetrix Expression |
| GTEX-SN8G-0126-SM-32PLI | 1        | C1       | 7.2   | Skin - Sun Exposed | 1511    | 1034     | 1043    | BP-23791 | LCSET-1666                        | TrueSeq.v1            |
| GTEX-SNMC-1226-SM-2XCFF | 1        | B1       | 7.7   | Skin - Sun Exposed | 1511    | 269      | 1009    | BP-23820 | LCSET-1562                        | TrueSeq.v1            |
| GTEX-SNMC-1226-SM-2XV54 | 1        | B1       | 7.7   | Skin - Sun Exposed | 1511    | 269      | 1009    | BP-23820 | GTE <sub>x</sub> AffyBatch9_May12 | Affymetrix Expression |
| GTEX-SSA3-0126-SM-32QPU | 0        | B1       | 7.1   | Skin - Sun Exposed | 1511    | 40       | 1310    | BP-24519 | LCSET-1667                        | TrueSeq.v1            |
| GTEX-SUCS-1926-SM-32PM3 | 1        | B1       | 6.9   | Skin - Sun Exposed | 1511    | 209      | 1131    | BP-24618 | LCSET-1666                        | TrueSeq.v1            |
| GTEX-T2IS-0126-SM-4DM6O | 0        | C1       | 7.8   | Skin - Sun Exposed | 1511    | 1076     | 1357    | BP-24455 | LCSET-3205                        | TrueSeq.v1            |
| GTEX-T2YK-0526-SM-32QPJ | 1        | C1       | 7     | Skin - Sun Exposed | 1511    | 859      | 1152    | BP-24618 | LCSET-1667                        | TrueSeq.v1            |
| GTEX-T5JC-0426-SM-32PLO | 1        | C1       | 8.2   | Skin - Sun Exposed | 1511    | 663      | 828     | BP-24678 | LCSET-1666                        | TrueSeq.v1            |
| GTEX-T5JC-0426-SM-5S2SL | 1        | C1       | 8.2   | Skin - Sun Exposed | 1511    |          | 828     | BP-24678 | LCSET-4990                        |                       |

| SAMPID                  | SMATSSCR | SMCENTER | SMRIN | SMTSD              | SMUBRID | SMTSISCH | SMTSPAX | SMNABTCH | SMGEBTCH   | SMGEBTCHT  |
|-------------------------|----------|----------|-------|--------------------|---------|----------|---------|----------|------------|------------|
| GTEX-T5JW-1626-SM-3GADZ | 0        | B1       | 6.8   | Skin - Sun Exposed | 1511    | 235      | 891     | BP-26092 | LCSET-2014 | TrueSeq.v1 |
| GTEX-T6MN-0126-SM-32PLP | 1        | C1       | 7.8   | Skin - Sun Exposed | 1511    | 689      | 899     | BP-24678 | LCSET-1666 | TrueSeq.v1 |
| GTEX-T6MN-0126-SM-5S2TD | 1        | C1       | 7.8   | Skin - Sun Exposed | 1511    |          | 899     | BP-24678 | LCSET-4990 |            |
| GTEX-T6MO-1626-SM-32QOM | 0        | B1       | 7     | Skin - Sun Exposed | 1511    | 182      | 730     | BP-24889 | LCSET-1667 | TrueSeq.v1 |
| GTEX-T8EM-1026-SM-3DB7M | 0        | C1       | 7.3   | Skin - Sun Exposed | 1511    | 378      | 1043    | BP-24889 | LCSET-1897 | TrueSeq.v1 |
| GTEX-TKQ1-1026-SM-4GICL | 0        | B1       | 7.8   | Skin - Sun Exposed | 1511    | 186      | 735     | BP-29546 | LCSET-3479 | TrueSeq.v1 |
| GTEX-TMKS-0126-SM-3DB7S | 0        | B1       | 7.2   | Skin - Sun Exposed | 1511    | 37       | 1051    | BP-25490 | LCSET-1897 | TrueSeq.v1 |
| GTEX-TML8-1926-SM-32QOS | 1        | B1       | 7.2   | Skin - Sun Exposed | 1511    | 256      | 972     | BP-25076 | LCSET-1667 | TrueSeq.v1 |
| GTEX-TMMY-0226-SM-33HBA | 0        | C1       | 6.8   | Skin - Sun Exposed | 1511    | 359      | 1250    | BP-25072 | LCSET-1668 | TrueSeq.v1 |
| GTEX-TMZS-0126-SM-3DB9Q | 0        | B1       | 6.4   | Skin - Sun Exposed | 1511    | 49       | 1082    | BP-25493 | LCSET-1898 | TrueSeq.v1 |
| GTEX-TSE9-0126-SM-3DB83 | 1        | C1       | 8     | Skin - Sun Exposed | 1511    | 1023     | 1424    | BP-25188 | LCSET-1897 | TrueSeq.v1 |
| GTEX-U3ZH-2026-SM-3DB78 | 0        | B1       | 8     | Skin - Sun Exposed | 1511    | 248      | 1147    | BP-25326 | LCSET-1897 | TrueSeq.v1 |
| GTEX-U3ZM-1526-SM-3DB9D | 0        | B1       | 6.3   | Skin - Sun Exposed | 1511    | 249      | 731     | BP-25562 | LCSET-1898 | TrueSeq.v1 |
| GTEX-U3ZN-2326-SM-3DB7W | 0        | B1       | 6.7   | Skin - Sun Exposed | 1511    | 176      | 956     | BP-25495 | LCSET-1897 | TrueSeq.v1 |
| GTEX-U412-0426-SM-3DB9O | 1        | C1       | 6.8   | Skin - Sun Exposed | 1511    | 1359     | 1381    | BP-25560 | LCSET-1898 | TrueSeq.v1 |
| GTEX-U4B1-1826-SM-4DXSU | 0        | B1       | 6.9   | Skin - Sun Exposed | 1511    | 245      | 1171    | BP-25601 | LCSET-3206 | TrueSeq.v1 |
| GTEX-U8T8-0126-SM-3DB94 | 1        | C1       | 6.5   | Skin - Sun Exposed | 1511    | 975      | 863     | BP-25630 | LCSET-1898 | TrueSeq.v1 |
| GTEX-U8XE-0326-SM-3DB8P | 0        | C1       | 7.1   | Skin - Sun Exposed | 1511    | 358      | 900     | BP-25740 | LCSET-1898 | TrueSeq.v1 |
| GTEX-UJHI-1526-SM-3DB99 | 1        | B1       | 6.6   | Skin - Sun Exposed | 1511    | 287      | 916     | BP-25965 | LCSET-1898 | TrueSeq.v1 |
| GTEX-UPIC-1626-SM-4IHKT | 0        | B1       | 5.8   | Skin - Sun Exposed | 1511    | 247      | 634     | BP-30376 | LCSET-3596 | TrueSeq.v1 |
| GTEX-UPJH-0326-SM-3GADU | 1        | C1       | 7.5   | Skin - Sun Exposed | 1511    | 799      | 1291    | BP-26354 | LCSET-2014 | TrueSeq.v1 |
| GTEX-UPK5-0726-SM-4IHL7 | 1        | C1       | 5.8   | Skin - Sun Exposed | 1511    | 983      | 1071    | BP-26451 | LCSET-3596 | TrueSeq.v1 |
| GTEX-V1D1-2226-SM-3NMAX | 0        | B1       | 7.1   | Skin - Sun Exposed | 1511    | 472      | 1043    | BP-26868 | LCSET-2351 | TrueSeq.v1 |
| GTEX-VJWN-0126-SM-3GIK7 | 2        | C1       | 7.5   | Skin - Sun Exposed | 1511    | 1045     | 1007    | BP-26938 | LCSET-2024 | TrueSeq.v1 |
| GTEX-VJYA-1126-SM-3GIJU | 0        | B1       | 7.2   | Skin - Sun Exposed | 1511    | 257      | 1062    | BP-26934 | LCSET-2024 | TrueSeq.v1 |



| SAMPID                       | SMATSSCR | SMCENTER | SMRIN | SMTSD              | SMUBRID | SMTSISCH | SMTSPAX | SMNABTCH | SMGEBTCH             | SMGEBTCHT                      |
|------------------------------|----------|----------|-------|--------------------|---------|----------|---------|----------|----------------------|--------------------------------|
| GTEX-VUSG-2526-SM-4KL1V      | 0        | B1       | 7.2   | Skin - Sun Exposed | 1511    | 289      | 474     | BP-30217 | LCSET-3626           | TrueSeq.v1                     |
| GTEX-VUSG-2526-SM-5S2S9      | 0        | B1       | 7.2   | Skin - Sun Exposed | 1511    |          | 474     | BP-30217 | LCSET-4990           |                                |
| GTEX-W5WG-1826-SM-4KL2Y      | 0        | B1       | 6.6   | Skin - Sun Exposed | 1511    | 266      | 1082    | BP-27175 | LCSET-3626           | TrueSeq.v1                     |
| GTEX-WEY5-1826-SM-5CHRT_rep1 | 1        | B1       | 5.4   | Skin - Sun Exposed | 1511    |          | 672     | BP-27394 |                      |                                |
| GTEX-WEY5-1826-SM-5CHRT_rep2 | 1        | B1       | 5.4   | Skin - Sun Exposed | 1511    |          | 672     | BP-27394 |                      |                                |
| GTEX-WFG8-2226-SM-3GIL9      | 0        | B1       | 6.2   | Skin - Sun Exposed | 1511    | 333      | 680     | BP-27446 | LCSET-2025           | TrueSeq.v1                     |
| GTEX-WFG8-2226-SM-5CHSS_rep1 | 0        | B1       | 6.2   | Skin - Sun Exposed | 1511    |          | 680     | BP-27446 |                      |                                |
| GTEX-WFON-2126-SM-3LK7O      | 0        | B1       | 7.7   | Skin - Sun Exposed | 1511    | 219      | 446     | BP-27491 | LCSET-2234           | TrueSeq.v1                     |
| GTEX-WFON-2126-SM-5CHR4_rep1 | 0        | B1       | 7.7   | Skin - Sun Exposed | 1511    |          | 446     | BP-27491 |                      |                                |
| GTEX-WFON-2126-SM-5S2T9      | 0        | B1       | 7.7   | Skin - Sun Exposed | 1511    |          | 446     | BP-27491 | LCSET-5404           |                                |
| GTEX-WH7G-2326-SM-3NMBC      | 1        | B1       | 6.2   | Skin - Sun Exposed | 1511    | 376      | 879     | BP-27853 | LCSET-2385           | TrueSeq.v1                     |
| GTEX-WI4N-1026-SM-3LK7N      | 0        | C1       | 7     | Skin - Sun Exposed | 1511    | 688      | 846     | BP-27941 | LCSET-2234           | TrueSeq.v1                     |
| GTEX-WOFL-0126-SM-3MJG2      | 1        | C1       | 7.4   | Skin - Sun Exposed | 1511    | 576      | 1100    | BP-28093 | LCSET-2269           | TrueSeq.v1                     |
| GTEX-WQUQ-0426-SM-3MJFU      | 1        | C1       | 7.1   | Skin - Sun Exposed | 1511    | 404      | 1287    | BP-28275 | LCSET-2269           | TrueSeq.v1                     |
| GTEX-WRHK-1426-SM-3MJF9      | 0        | B1       | 7     | Skin - Sun Exposed | 1511    | 299      | 375     | BP-28509 | LCSET-2269           | TrueSeq.v1                     |
| GTEX-WVJS-0126-SM-4MVOT      | 1        | C1       | 6.2   | Skin - Sun Exposed | 1511    | 726      | 1434    | BP-36182 | LCSET-3652           | TrueSeq.v1                     |
| GTEX-WXYG-2326-SM-4E3I6      | 0        | B1       | 7.8   | Skin - Sun Exposed | 1511    | 213      | 591     | BP-36063 | LCSET-3416           | TrueSeq.v1                     |
| GTEX-WY7C-2326-SM-3NB2U      | 1        | B1       | 7.1   | Skin - Sun Exposed | 1511    | 235      | 848     | BP-29478 | LCSET-2318           | TrueSeq.v1                     |
| GTEX-WYBS-0126-SM-3PYKA      | 2        | C1       |       | Skin - Sun Exposed | 1511    | 853      | 610     | BP-29327 | GTEEx_batch9_EX_001  | Illumina Human Exome SNP Array |
| GTEX-WYBS-0126-SM-3PZ7C      | 2        | C1       |       | Skin - Sun Exposed | 1511    | 853      | 610     | BP-29327 | GTEEx_batch9_OM5_001 | Illumina OMNI SNP Array        |
| GTEX-WYBS-0126-SM-4SVQC      | 2        | C1       |       | Skin - Sun Exposed | 1511    | 853      | 610     | BP-29327 | LCSET-4029           | Standard Exome Sequencing v3   |
| GTEX-WYJK-0126-SM-3NMAB      | 0        | C1       | 6.9   | Skin - Sun Exposed | 1511    | 704      | 750     | BP-29433 | LCSET-2351           | TrueSeq.v1                     |
| GTEX-WYVS-2126-SM-3NMA3      | 0        | B1       | 7.7   | Skin - Sun Exposed | 1511    | 311      | 798     | BP-29831 | LCSET-2351           | TrueSeq.v1                     |
| GTEX-WZTO-0126-SM-3NM95      | 0        | C1       | 7.7   | Skin - Sun Exposed | 1511    | 478      | 838     | BP-29770 | LCSET-2351           | TrueSeq.v1                     |
| GTEX-X261-0126-SM-3NMD6      | 1        | B1       | 8     | Skin - Sun Exposed | 1511    | 741      | 1067    | BP-29824 | LCSET-2385           | TrueSeq.v1                     |

| SAMPID                  | SMATSSCR | SMCENTER | SMRIN | SMTSD              | SMUBRID | SMTSISCH | SMTSPAX | SMNABTCH | SMGEBTCH   | SMGEBTCHT  |
|-------------------------|----------|----------|-------|--------------------|---------|----------|---------|----------|------------|------------|
| GTEX-X4EO-0326-SM-3P5YO | 2        | C1       | 7.8   | Skin - Sun Exposed | 1511    | 779      | 1338    | BP-30679 | LCSET-2386 | TrueSeq.v1 |
| GTEX-X4EP-0126-SM-3P5YV | 0        | C1       | 6     | Skin - Sun Exposed | 1511    | 1104     | 1409    | BP-30276 | LCSET-2386 | TrueSeq.v1 |
| GTEX-X4XX-0126-SM-3NMC2 | 0        | C1       | 6.5   | Skin - Sun Exposed | 1511    | 287      | 1437    | BP-30738 | LCSET-2385 | TrueSeq.v1 |
| GTEX-X4XY-0226-SM-4E3IZ | 1        | C1       | 8.5   | Skin - Sun Exposed | 1511    | 609      | 1122    | BP-36201 | LCSET-3416 | TrueSeq.v1 |
| GTEX-X585-0226-SM-4QAS2 | 1        | C1       | 5.7   | Skin - Sun Exposed | 1511    | 780      | 1127    | BP-31273 | LCSET-3737 | TrueSeq.v1 |
| GTEX-X5EB-2226-SM-46MW4 | 0        | B1       | 7.4   | Skin - Sun Exposed | 1511    | 274      | 947     | BP-31273 | LCSET-2933 | TrueSeq.v1 |
| GTEX-X62O-0126-SM-4E3JN | 1        | C1       | 6.4   | Skin - Sun Exposed | 1511    | 851      | 793     | BP-36063 | LCSET-3416 | TrueSeq.v1 |
| GTEX-X638-0126-SM-47JZ8 | 0        | B1       | 7.4   | Skin - Sun Exposed | 1511    | 42       | 1048    | BP-36063 | LCSET-2974 | TrueSeq.v1 |
| GTEX-X88G-0126-SM-47JZ3 | 0        | B1       | 6.6   | Skin - Sun Exposed | 1511    | 130      | 1147    | BP-32413 | LCSET-2974 | TrueSeq.v1 |
| GTEX-X8HC-0126-SM-4E3JW | 1        | C1       | 6.6   | Skin - Sun Exposed | 1511    | 749      | 921     | BP-36259 | LCSET-3416 | TrueSeq.v1 |
| GTEX-XAJ8-0826-SM-47JY6 | 0        | B1       | 8     | Skin - Sun Exposed | 1511    | 168      | 1093    | BP-31549 | LCSET-2974 | TrueSeq.v1 |
| GTEX-XBED-2226-SM-47JYQ | 1        | B1       | 8.5   | Skin - Sun Exposed | 1511    | 211      | 378     | BP-31585 | LCSET-2974 | TrueSeq.v1 |
| GTEX-XBEW-0626-SM-4QASP | 0        | C1       | 8.9   | Skin - Sun Exposed | 1511    | 439      | 1409    | BP-36349 | LCSET-3737 | TrueSeq.v1 |
| GTEX-XMD2-0126-SM-4YCDU | 1        | C1       | 7.7   | Skin - Sun Exposed | 1511    | 1339     | 1174    | BP-36411 | LCSET-4197 | TrueSeq.v1 |
| GTEX-XOTO-0126-SM-4B66N | 0        | C1       | 8.1   | Skin - Sun Exposed | 1511    | 592      | 1238    | BP-33606 | LCSET-3141 | TrueSeq.v1 |
| GTEX-XPVG-2626-SM-4B669 | 1        | B1       | 7.4   | Skin - Sun Exposed | 1511    | 221      | 914     | BP-34001 | LCSET-3141 | TrueSeq.v1 |
| GTEX-XQ3S-1526-SM-4BOOC | 1        | C1       | 7.1   | Skin - Sun Exposed | 1511    | 894      | 1115    | BP-34117 | LCSET-3145 | TrueSeq.v1 |
| GTEX-XQ8I-0426-SM-4BOPO | 1        | C1       | 7.7   | Skin - Sun Exposed | 1511    | 412      | 1103    | BP-33923 | LCSET-3145 | TrueSeq.v1 |
| GTEX-XUJ4-2426-SM-4BOO3 | 0        | B1       | 6.2   | Skin - Sun Exposed | 1511    | 197      | 503     | BP-34317 | LCSET-3145 | TrueSeq.v1 |
| GTEX-XUW1-0426-SM-4BOOT | 0        | C1       | 7.6   | Skin - Sun Exposed | 1511    | 337      | 997     | BP-34129 | LCSET-3145 | TrueSeq.v1 |
| GTEX-XUYS-0126-SM-47JWZ | 0        | B1       | 8.8   | Skin - Sun Exposed | 1511    | 27       | 1230    | BP-34929 | LCSET-2974 | TrueSeq.v1 |
| GTEX-XUZC-1726-SM-4BRWS | 0        | B1       | 6.3   | Skin - Sun Exposed | 1511    | 163      | 466     | BP-34543 | LCSET-3152 | TrueSeq.v1 |
| GTEX-XV7Q-2526-SM-4BRV9 | 0        | B1       | 6.7   | Skin - Sun Exposed | 1511    | 146      | 370     | BP-34738 | LCSET-3152 | TrueSeq.v1 |
| GTEX-XXEK-2226-SM-4BRUM | 0        | B1       | 6.2   | Skin - Sun Exposed | 1511    | 215      | 1132    | BP-34799 | LCSET-3152 | TrueSeq.v1 |
| GTEX-XXEK-2226-SM-5S2SA | 0        | B1       | 6.2   | Skin - Sun Exposed | 1511    |          | 1132    | BP-34799 | LCSET-4990 |            |

| SAMPID                         | SMATSSCR | SMCENTER | SMRIN | SMTSD              | SMUBRID | SMTSISCH | SMTSPAX | SMNABTCH | SMGEBTCH   | SMGEBTCHT  |
|--------------------------------|----------|----------|-------|--------------------|---------|----------|---------|----------|------------|------------|
| GTEX-XYKS-2126-SM-4E3IB        | 1        | B1       | 8.4   | Skin - Sun Exposed | 1511    | 218      | 1073    | BP-34929 | LCSET-3416 | TrueSeq.v1 |
| GTEX-Y111-0126-SM-4SOIV        | 2        | B1       | 7.3   | Skin - Sun Exposed | 1511    | 1399     | 1157    | BP-34830 | LCSET-3995 | TrueSeq.v1 |
| GTEX-Y114-2426-SM-4TT8A        | 0        | B1       | 7.6   | Skin - Sun Exposed | 1511    | 228      | 466     | BP-35758 | LCSET-4016 | TrueSeq.v1 |
| GTEX-Y3I4-2126-SM-4TT7C        | 0        | B1       | 7.7   | Skin - Sun Exposed | 1511    | 179      | 393     | BP-41604 | LCSET-4016 | TrueSeq.v1 |
| GTEX-Y3IK-2426-SM-4WWDU        | 0        | B1       | 8.3   | Skin - Sun Exposed | 1511    | 174      | 380     | BP-35836 | LCSET-4180 | TrueSeq.v1 |
| GTEX-Y5LM-1926-SM-5RQJH        | 1        | B1       | 7     | Skin - Sun Exposed | 1511    | 187      | 964     | BP-48564 | LCSET-4955 | TrueSeq.v1 |
| GTEX-Y5V5-2326-SM-4V6GA        | 0        | B1       | 8.4   | Skin - Sun Exposed | 1511    | 266      | 419     | BP-41604 | LCSET-4035 | TrueSeq.v1 |
| GTEX-Y5V6-2426-SM-4VDSB        | 0        | B1       | 7.6   | Skin - Sun Exposed | 1511    | 212      | 1261    | BP-42185 | LCSET-4040 | TrueSeq.v1 |
| GTEX-Y8DK-0126-SM-4TT3L        | 0        | B1       | 8.2   | Skin - Sun Exposed | 1511    | 1100     | 581     | BP-41767 | LCSET-4014 | TrueSeq.v1 |
| GTEX-Y8E4-0626-SM-4WWDL        | 1        | C1       | 8     | Skin - Sun Exposed | 1511    | 376      | 629     | BP-41604 | LCSET-4180 | TrueSeq.v1 |
| GTEX-Y8LW-1826-SM-5S2MV        | 0        | B1       | 6.3   | Skin - Sun Exposed | 1511    | 341      | 1027    | BP-48564 | LCSET-4988 | TrueSeq.v1 |
| GTEX-YB5E-2026-SM-5IFIS        | 0        | B1       | 7.5   | Skin - Sun Exposed | 1511    | 261      | 856     | BP-45247 | LCSET-4830 | TrueSeq.v1 |
| GTEX-YB5K-2126-SM-4WWDJ        | 1        | B1       | 7.2   | Skin - Sun Exposed | 1511    | 284      | 1221    | BP-41767 | LCSET-4180 | TrueSeq.v1 |
| GTEX-YEC4-2126-SM-5IFJH        | 0        | B1       | 6.6   | Skin - Sun Exposed | 1511    | 253      | 1008    | BP-45247 | LCSET-4830 | TrueSeq.v1 |
| GTEX-YF7O-2326-101833-SM-5CVN9 |          | B1       | 6     | Skin - Sun Exposed |         |          |         | BP-45390 | LCSET-4633 | TrueSeq.v1 |
| GTEX-YFC4-0126-101855-SM-5CVLZ |          | C1       | 7.4   | Skin - Sun Exposed |         |          |         | BP-45390 | LCSET-4633 | TrueSeq.v1 |
| GTEX-YFC4-0126-SM-5CVLY        | 0        | C1       | 6.8   | Skin - Sun Exposed | 1511    | 688      | 1403    | BP-45390 | LCSET-4633 | TrueSeq.v1 |
| GTEX-YJ89-0126-SM-4TT3X        | 1        | C1       | 7.9   | Skin - Sun Exposed | 1511    | 1135     | 1439    | BP-42128 | LCSET-4014 | TrueSeq.v1 |
| GTEX-YJ8A-0426-SM-5IFID        | 0        | B1       | 7.8   | Skin - Sun Exposed | 1511    | 211      | 479     | BP-45395 | LCSET-4830 | TrueSeq.v1 |
| GTEX-Z93S-0126-SM-5HL7M        | 0        | C1       | 7.1   | Skin - Sun Exposed | 1511    | 1038     | 1261    | BP-45395 | LCSET-4807 | TrueSeq.v1 |
| GTEX-Z93T-0126-SM-5HL5N        | 0        | B1       | 6.9   | Skin - Sun Exposed | 1511    | 17       | 868     | BP-45247 | LCSET-4806 | TrueSeq.v1 |
| GTEX-Z9EW-1626-SM-5CVMN        | 0        | B1       | 7.8   | Skin - Sun Exposed | 1511    | 239      | 1058    | BP-45390 | LCSET-4633 | TrueSeq.v1 |
| GTEX-ZAB4-0226-SM-5N9F5        | 1        | C1       | 5.7   | Skin - Sun Exposed | 1511    | 465      | 535     | BP-45390 | LCSET-4905 | TrueSeq.v1 |
| GTEX-ZAB5-1826-SM-5HL7C        | 0        | B1       | 6.6   | Skin - Sun Exposed | 1511    | 223      | 621     | BP-45395 | LCSET-4807 | TrueSeq.v1 |
| GTEX-ZAJG-0126-SM-5HL94        | 0        | C1       | 6.5   | Skin - Sun Exposed | 1511    | 724      | 625     | BP-45395 | LCSET-4807 | TrueSeq.v1 |

| SAMPID                  | SMATSSCR | SMCENTER | SMRIN | SMTSD              | SMUBRID | SMTSISCH | SMTSPAX | SMNABTCH | SMGEBTCH   | SMGEBTCHT  |
|-------------------------|----------|----------|-------|--------------------|---------|----------|---------|----------|------------|------------|
| GTEX-ZAK1-0126-SM-5IJD3 | 0        | C1       | 7.3   | Skin - Sun Exposed | 1511    | 710      | 1296    | BP-45485 | LCSET-4814 | TrueSeq.v1 |
| GTEX-ZC5H-0226-SM-4WAY9 | 0        | B1       | 6.6   | Skin - Sun Exposed | 1511    | 212      | 491     | BP-42024 | LCSET-4162 | TrueSeq.v1 |
| GTEX-ZDTS-0126-SM-4WAY5 | 0        | C1       | 7.5   | Skin - Sun Exposed | 1511    | 628      | 563     | BP-42528 | LCSET-4162 | TrueSeq.v1 |
| GTEX-ZDTT-2726-SM-4WKf8 | 0        | B1       | 6.7   | Skin - Sun Exposed | 1511    | 183      | 360     | BP-42588 | LCSET-4170 | TrueSeq.v1 |
| GTEX-ZDXO-3026-SM-5J1N5 | 0        | B1       | 6.1   | Skin - Sun Exposed | 1511    | 1073     | 1152    | BP-45485 | LCSET-4816 | TrueSeq.v1 |
| GTEX-ZDYS-2026-SM-5HL5L | 0        | C1       | 7.6   | Skin - Sun Exposed | 1511    | 205      | 398     | BP-45395 | LCSET-4806 | TrueSeq.v1 |
| GTEX-ZE7O-0126-SM-57WC1 | 1        | B1       | 7.2   | Skin - Sun Exposed | 1511    | 1065     | 1116    | BP-42826 | LCSET-4415 | TrueSeq.v1 |
| GTEX-ZE9C-2726-SM-57WB5 | 0        | C1       | 7.3   | Skin - Sun Exposed | 1511    | 682      | 1279    | BP-42743 | LCSET-4788 | TrueSeq.v1 |
| GTEX-ZEX8-2426-SM-4WKG4 | 1        | B1       | 5.7   | Skin - Sun Exposed | 1511    | 195      | 878     | BP-42869 | LCSET-4170 | TrueSeq.v1 |
| GTEX-ZF28-0126-SM-4WKGK | 2        | C1       | 5.8   | Skin - Sun Exposed | 1511    | 463      | 613     | BP-42869 | LCSET-4170 | TrueSeq.v1 |
| GTEX-ZF2S-2326-SM-4WWCE | 1        | B1       | 8.5   | Skin - Sun Exposed | 1511    | 184      | 839     | BP-43141 | LCSET-4179 | TrueSeq.v1 |
| GTEX-ZGAY-0526-SM-4WWBB | 0        | C1       | 8     | Skin - Sun Exposed | 1511    | 229      | 1358    | BP-43072 | LCSET-4179 | TrueSeq.v1 |
| GTEX-ZP4G-2426-SM-57WEY | 0        | B1       | 7.2   | Skin - Sun Exposed | 1511    | 270      | 1032    | BP-43308 | LCSET-4416 | TrueSeq.v1 |
| GTEX-ZPIC-1726-SM-57WF2 | 0        | B1       | 7.5   | Skin - Sun Exposed | 1511    | 162      | 1180    | BP-43231 | LCSET-4416 | TrueSeq.v1 |
| GTEX-ZQG8-1626-SM-5HL6H | 2        | B1       | 7.7   | Skin - Sun Exposed | 1511    | 180      | 1104    | BP-45268 | LCSET-4806 | TrueSeq.v1 |
| GTEX-ZQUD-1426-SM-57WER | 0        | B1       | 6.5   | Skin - Sun Exposed | 1511    | 221      | 1047    | BP-43231 | LCSET-4416 | TrueSeq.v1 |
| GTEX-ZT9W-2426-SM-57WFJ | 0        | B1       | 7.3   | Skin - Sun Exposed | 1511    | 180      | 726     | BP-43441 | LCSET-4416 | TrueSeq.v1 |
| GTEX-ZTPG-0326-SM-5O9AX | 0        | B1       | 7.3   | Skin - Sun Exposed | 1511    | 208      | 726     | BP-43639 | LCSET-4909 | TrueSeq.v1 |
| GTEX-ZTSS-1926-SM-57WEW | 0        | B1       | 7     | Skin - Sun Exposed | 1511    | 244      | 1234    | BP-43441 | LCSET-4416 | TrueSeq.v1 |
| GTEX-ZTX8-1426-SM-5DUVO | 0        | B1       | 7.5   | Skin - Sun Exposed | 1511    | 184      | 831     | BP-43308 | LCSET-4634 | TrueSeq.v1 |
| GTEX-ZU9S-0226-SM-5E441 | 1        | C1       | 7.4   | Skin - Sun Exposed | 1511    | 493      | 1185    | BP-43308 | LCSET-4635 | TrueSeq.v1 |
| GTEX-ZUA1-0126-SM-5GU76 | 0        | C1       | 6.1   | Skin - Sun Exposed | 1511    | 865      | 754     | BP-43823 | LCSET-4803 | TrueSeq.v1 |
| GTEX-ZV68-0126-SM-59HKS | 0        | B1       | 8     | Skin - Sun Exposed | 1511    | 1237     | 1033    | BP-43231 | LCSET-4419 | TrueSeq.v1 |
| GTEX-ZV6S-2326-SM-4YCEY | 1        | B1       | 7.1   | Skin - Sun Exposed | 1511    | 433      | 503     | BP-43375 | LCSET-4197 | TrueSeq.v1 |
| GTEX-ZVE2-0226-SM-59HJB | 1        | C1       | 7.7   | Skin - Sun Exposed | 1511    | 521      | 838     | BP-43441 | LCSET-4419 | TrueSeq.v1 |

| SAMPID                  | SMATSSCR | SMCENTER | SMRIN | SMTSD              | SMUBRID | SMTSISCH | SMTSPAX | SMNABTCH | SMGEBTCH   | SMGEBTCHT  |
|-------------------------|----------|----------|-------|--------------------|---------|----------|---------|----------|------------|------------|
| GTEX-ZVT2-2526-SM-51MT1 | 0        | B1       | 7.8   | Skin - Sun Exposed | 1511    | 149      | 1058    | BP-43375 | LCSET-4207 | TrueSeq.v1 |
| GTEX-ZVT3-0126-SM-5GU6I | 0        | C1       | 7     | Skin - Sun Exposed | 1511    | 572      | 496     | BP-43823 | LCSET-4803 | TrueSeq.v1 |
| GTEX-ZVT4-0126-SM-51MS1 | 0        | C1       | 7.5   | Skin - Sun Exposed | 1511    | 602      | 711     | BP-43375 | LCSET-4207 | TrueSeq.v1 |
| GTEX-ZVTK-0426-SM-51MRS | 1        | C1       | 7.2   | Skin - Sun Exposed | 1511    | 945      | 1235    | BP-43375 | LCSET-4207 | TrueSeq.v1 |
| GTEX-ZVZO-0126-SM-5A5L9 | 0        | B1       | 6.9   | Skin - Sun Exposed | 1511    | 143      | 1170    | BP-43495 | LCSET-4423 | TrueSeq.v1 |
| GTEX-ZVZP-2426-SM-59HKJ | 0        | B1       | 7.2   | Skin - Sun Exposed | 1511    | 158      | 973     | BP-43441 | LCSET-4419 | TrueSeq.v1 |
| GTEX-ZVZQ-0326-SM-59HLL | 0        | C1       | 7.7   | Skin - Sun Exposed | 1511    | 1110     | 1423    | BP-43441 | LCSET-4419 | TrueSeq.v1 |
| GTEX-ZWKS-0126-SM-5SIAA | 0        | C1       | 7.1   | Skin - Sun Exposed | 1511    | 954      | 1039    | BP-43956 | LCSET-5174 | TrueSeq.v1 |
| GTEX-ZXES-1826-SM-5E43S | 0        | B1       | 6.1   | Skin - Sun Exposed | 1511    | 150      | 910     | BP-43495 | LCSET-4635 | TrueSeq.v1 |
| GTEX-ZXG5-0126-SM-5GIEU | 1        | B1       | 6.9   | Skin - Sun Exposed | 1511    | 1058     | 765     | BP-43823 | LCSET-4796 | TrueSeq.v1 |
| GTEX-ZY6K-1826-SM-5GZXK | 0        | B1       | 7     | Skin - Sun Exposed | 1511    | 268      | 1259    | BP-43507 | LCSET-4804 | TrueSeq.v1 |
| GTEX-ZYFC-0226-SM-5NQ75 | 1        | C1       | 7.6   | Skin - Sun Exposed | 1511    | 1321     | 1306    | BP-43639 | LCSET-4906 | TrueSeq.v1 |
| GTEX-ZYFD-0126-SM-5GIDL | 0        | C1       | 8.2   | Skin - Sun Exposed | 1511    | 525      | 519     | BP-44261 | LCSET-5161 | TrueSeq.v1 |
| GTEX-ZYFG-2326-SM-5E44B | 0        | B1       | 5.9   | Skin - Sun Exposed | 1511    | 147      | 443     | BP-44437 | LCSET-4635 | TrueSeq.v1 |
| GTEX-ZYT6-0226-SM-5NQ6T | 0        | C1       | 8.3   | Skin - Sun Exposed | 1511    | 1402     | 587     | BP-43529 | LCSET-4906 | TrueSeq.v1 |
| GTEX-ZYW4-0126-SM-5E44A | 1        | C1       | 7.4   | Skin - Sun Exposed | 1511    | 745      | 1069    | BP-44437 | LCSET-4635 | TrueSeq.v1 |
| GTEX-ZYY3-0126-SM-5GZY5 | 0        | C1       | 6.6   | Skin - Sun Exposed | 1511    | 484      | 696     | BP-43693 | LCSET-4804 | TrueSeq.v1 |
| GTEX-ZZ64-1726-SM-5GZYB | 0        | B1       | 8     | Skin - Sun Exposed | 1511    | 236      | 1188    | BP-43753 | LCSET-4804 | TrueSeq.v1 |
| GTEX-ZZPT-0226-SM-5E43X | 0        | C1       | 7.2   | Skin - Sun Exposed | 1511    | 1094     | 475     | BP-43529 | LCSET-4635 | TrueSeq.v1 |

**Supplementary Table S3.** Primer pairs used for RT-PCR experiments.

| Gene Name    | Transcript ID     | Forward Primer (5'-3')     | Reverse Primer (5'-3')     |
|--------------|-------------------|----------------------------|----------------------------|
| TNFAIP3      | ENST00000612899   | CATGGGTGTGTCTGTGGAAG       | GCTGGCAACTGGAGTCTCTC       |
| VEGFA        | ENST00000523950   | GCAGTAGCTGCGCTGATAGA       | CCTTGCTGCTCTACCTCCAC       |
| SLC27A4      | ENST00000372870   | CTTCACCTTCAGGAGGACCA       | TGGGATTCTCCCTGTTGTTC       |
| RP11-356I2.4 | ENST00000606998.1 | CACGTTTCATACCTGCCACTG      | ACAAGGCTGCCAGAAGATGT       |
| LNC_000057   | XLOC_010023       | ATAAAGTTGAAGATAAATAGGCACCA | CTCTCTCTCTCTCTCTCACACACACA |
| LNC_000104   | XLOC_023709       | GAAAGGGAAAGAGATAGACTACTGGA | ATGAAAGACTGAGAAAAAACAAAACC |
| LNC_000310   | XLOC_070305       | CCAACTTTCTTCTGTTCACTTTCTTA | TAGTCCTTTTCTTGTTTGTTCAT    |
| LNC_000311   | XLOC_070305       | CCAACTTTCTTCTGTTCACTTTCTT  | AGTCCTTTTCTTGTTTGTTCAT     |

**Supplementary Table S4.** Detailed data obtained and mapping conditions for each sample in RNA-Seq.

| Sample name                   | C_1                  | C_2                  | C_3                  | C_4                  | N_1                  | N_2                  | N_3                  | N_4                   |
|-------------------------------|----------------------|----------------------|----------------------|----------------------|----------------------|----------------------|----------------------|-----------------------|
| Raw reads                     | 96353430             | 103811982            | 100482406            | 111491218            | 106459578            | 84573866             | 94447152             | 112828900             |
| Clean reads                   | 91789150             | 99540764             | 96144170             | 107047198            | 102061624            | 81167320             | 90605064             | 108129618             |
| Total mapped*                 | 85173573<br>(92.79%) | 92315000<br>(92.74%) | 89370499<br>(92.95%) | 99494797<br>(92.94%) | 93562741<br>(91.67%) | 73840947<br>(90.97%) | 81609212<br>(90.07%) | 100243701<br>(92.71%) |
| Multiple mapped*              | 4158857<br>(4.53%)   | 3626588<br>(3.64%)   | 3198479<br>(3.33%)   | 3330127<br>(3.11%)   | 6844185<br>(6.71%)   | 3804493<br>(4.69%)   | 3771308<br>(4.16%)   | 3614248 (3.34%)       |
| Uniquely mapped*              | 81014716<br>(88.26%) | 88688412<br>(89.1%)  | 86172020<br>(89.63%) | 96164670<br>(89.83%) | 86718556<br>(84.97%) | 70036454<br>(86.29%) | 77837904<br>(85.91%) | 96629453<br>(89.36%)  |
| Reads map to '+'strand*       | 40546609<br>(44.17%) | 44332199<br>(44.54%) | 43112516<br>(44.84%) | 48092028<br>(44.93%) | 43404302<br>(42.53%) | 35032941<br>(43.16%) | 38911651<br>(42.95%) | 48327813<br>(44.69%)  |
| Reads map to '-'strand*       | 40468107<br>(44.09%) | 44356213<br>(44.56%) | 43059504<br>(44.79%) | 48072642<br>(44.91%) | 43314254<br>(42.44%) | 35003513<br>(43.13%) | 38926253<br>(42.96%) | 48301640<br>(44.67%)  |
| Non-splice reads*             | 65047794<br>(70.87%) | 70812442<br>(71.14%) | 69834764<br>(72.64%) | 77679404<br>(72.57%) | 72229256<br>(70.77%) | 56013723<br>(69.01%) | 65104779<br>(71.86%) | 81949199<br>(75.79%)  |
| Splice reads*                 | 15966922<br>(17.4%)  | 17875970<br>(17.96%) | 16337256<br>(16.99%) | 18485266<br>(17.27%) | 14489300<br>(14.2%)  | 14022731<br>(17.28%) | 12733125<br>(14.05%) | 14680254<br>(13.58%)  |
| Reads mapped in proper pairs* | 75531322<br>(82.29%) | 81603896<br>(81.98%) | 79630656<br>(82.82%) | 87997446<br>(82.2%)  | 79920816<br>(78.31%) | 64758876<br>(79.78%) | 71727698<br>(79.17%) | 88821342<br>(82.14%)  |

\*Numbers in the brackets stand for percentages of clean reads.

**Supplementary Table S5.** Characteristics of the novel lncRNAs identified in this study.

| Novel_lncRNA<br>ID | Novel_lncRNA<br>Gene_ID | Gene_Type        | Status       | Chromosome | Start    | End      | Strand | Exon<br>number | Length | ORF |
|--------------------|-------------------------|------------------|--------------|------------|----------|----------|--------|----------------|--------|-----|
| LNC_000302         | XLOC_069409             | lincRNA          | Novel_lncRNA | chr8       | 1753956  | 1755622  | -      | 2              | 1255   | 84  |
| LNC_000311         | XLOC_070305             | lincRNA          | Novel_lncRNA | chr8       | 85973919 | 85978858 | -      | 3              | 2281   | 129 |
| LNC_000228         | XLOC_054681             | lincRNA          | Novel_lncRNA | chr5       | 2695138  | 2696876  | +      | 2              | 1171   | 184 |
| LNC_000229         | XLOC_054707             | lincRNA          | Novel_lncRNA | chr5       | 6774631  | 6777820  | +      | 2              | 3015   | 166 |
| LNC_000217         | XLOC_052430             | lincRNA          | Novel_lncRNA | chr4       | 1.75E+08 | 1.75E+08 | +      | 2              | 1844   | 140 |
| LNC_000103         | XLOC_022757             | lincRNA          | Novel_lncRNA | chr14      | 1.05E+08 | 1.05E+08 | -      | 4              | 3500   | 231 |
| LNC_000215         | XLOC_052164             | lincRNA          | Novel_lncRNA | chr4       | 1.54E+08 | 1.54E+08 | +      | 3              | 1168   | 147 |
| LNC_000214         | XLOC_052164             | lincRNA          | Novel_lncRNA | chr4       | 1.54E+08 | 1.54E+08 | +      | 3              | 3162   | 147 |
| LNC_000059         | XLOC_010833             | lincRNA          | Novel_lncRNA | chr11      | 13051501 | 13054740 | +      | 2              | 1747   | 110 |
| LNC_000058         | XLOC_010604             | lincRNA          | Novel_lncRNA | chr11      | 1043199  | 1049601  | +      | 2              | 1912   | 206 |
| LNC_000211         | XLOC_051728             | lincRNA          | Novel_lncRNA | chr4       | 1.23E+08 | 1.23E+08 | +      | 2              | 395    | 103 |
| LNC_000102         | XLOC_022585             | lincRNA          | Novel_lncRNA | chr14      | 98366094 | 98370286 | -      | 2              | 3622   | 155 |
| LNC_000055         | XLOC_009995             | antisense_lncRNA | Novel_lncRNA | chr10      | 86960405 | 86961871 | -      | 2              | 1385   | 143 |
| LNC_000054         | XLOC_009988             | lincRNA          | Novel_lncRNA | chr10      | 86536969 | 86556167 | -      | 4              | 1032   | 162 |
| LNC_000057         | XLOC_010023             | lincRNA          | Novel_lncRNA | chr10      | 88068564 | 88089263 | -      | 6              | 8326   | 120 |
| LNC_000056         | XLOC_010023             | lincRNA          | Novel_lncRNA | chr10      | 88068564 | 88089259 | -      | 5              | 8305   | 120 |
| LNC_000051         | XLOC_009328             | lincRNA          | Novel_lncRNA | chr10      | 29913907 | 29928614 | -      | 2              | 1489   | 98  |
| LNC_000050         | XLOC_009103             | lincRNA          | Novel_lncRNA | chr10      | 8571497  | 8594433  | -      | 2              | 1990   | 99  |
| LNC_000053         | XLOC_009933             | lincRNA          | Novel_lncRNA | chr10      | 79685266 | 79688046 | -      | 2              | 1883   | 131 |
| LNC_000052         | XLOC_009490             | lincRNA          | Novel_lncRNA | chr10      | 45218655 | 45224445 | -      | 2              | 289    | 83  |
| LNC_000114         | XLOC_027001             | lincRNA          | Novel_lncRNA | chr16      | 17569821 | 17572438 | -      | 2              | 1848   | 122 |
| LNC_000115         | XLOC_027065             | lincRNA          | Novel_lncRNA | chr16      | 22809921 | 22812326 | -      | 2              | 761    | 90  |



| Novel_lncRNA ID | Novel_lncRNA Gene_ID | Gene_Type        | Status       | Chromosome | Start    | End      | Strand | Exon number | Length | ORF |
|-----------------|----------------------|------------------|--------------|------------|----------|----------|--------|-------------|--------|-----|
| LNC_000116      | XLOC_027510          | lincRNA          | Novel_lncRNA | chr16      | 63408477 | 63409663 | -      | 2           | 857    | 79  |
| LNC_000117      | XLOC_027609          | lincRNA          | Novel_lncRNA | chr16      | 68589667 | 68596281 | -      | 3           | 1716   | 200 |
| LNC_000110      | XLOC_025142          | lincRNA          | Novel_lncRNA | chr15      | 81915407 | 81926440 | -      | 3           | 688    | 94  |
| LNC_000111      | XLOC_025251          | antisense_lncRNA | Novel_lncRNA | chr15      | 89107619 | 89122584 | -      | 2           | 1356   | 141 |
| LNC_000112      | XLOC_026566          | lincRNA          | Novel_lncRNA | chr16      | 85302532 | 85308600 | +      | 2           | 1571   | 130 |
| LNC_000113      | XLOC_026670          | lincRNA          | Novel_lncRNA | chr16      | 89973785 | 89974650 | +      | 2           | 472    | 66  |
| LNC_000297      | XLOC_067763          | lincRNA          | Novel_lncRNA | chr8       | 1041962  | 1045729  | +      | 2           | 2372   | 145 |
| LNC_000296      | XLOC_067556          | lincRNA          | Novel_lncRNA | chr7       | 1.49E+08 | 1.49E+08 | -      | 2           | 2120   | 70  |
| LNC_000295      | XLOC_067390          | lincRNA          | Novel_lncRNA | chr7       | 1.31E+08 | 1.31E+08 | -      | 2           | 658    | 56  |
| LNC_000294      | XLOC_066942          | lincRNA          | Novel_lncRNA | chr7       | 94276500 | 94385514 | -      | 4           | 2691   | 142 |
| LNC_000118      | XLOC_027710          | lincRNA          | Novel_lncRNA | chr16      | 72473685 | 72478757 | -      | 2           | 2868   | 94  |
| LNC_000119      | XLOC_027922          | lincRNA          | Novel_lncRNA | chr16      | 88184573 | 88186800 | -      | 2           | 2146   | 370 |
| LNC_000291      | XLOC_066346          | antisense_lncRNA | Novel_lncRNA | chr7       | 48042778 | 48052816 | -      | 2           | 2489   | 132 |
| LNC_000290      | XLOC_066346          | antisense_lncRNA | Novel_lncRNA | chr7       | 48042778 | 48052791 | -      | 3           | 1615   | 116 |
| LNC_000319      | XLOC_070960          | lincRNA          | Novel_lncRNA | chr8       | 1.45E+08 | 1.45E+08 | -      | 2           | 3406   | 152 |
| LNC_000198      | XLOC_048620          | antisense_lncRNA | Novel_lncRNA | chr3       | 15014667 | 15017887 | -      | 2           | 1506   | 87  |
| LNC_000199      | XLOC_049351          | lincRNA          | Novel_lncRNA | chr3       | 1.04E+08 | 1.04E+08 | -      | 2           | 1892   | 83  |
| LNC_000194      | XLOC_048215          | lincRNA          | Novel_lncRNA | chr3       | 1.94E+08 | 1.94E+08 | +      | 2           | 619    | 90  |
| LNC_000195      | XLOC_048383          | lincRNA          | Novel_lncRNA | chr3       | 3914378  | 3963045  | -      | 2           | 14091  | 111 |
| LNC_000196      | XLOC_048484          | lincRNA          | Novel_lncRNA | chr3       | 7915327  | 7919836  | -      | 2           | 3027   | 137 |
| LNC_000197      | XLOC_048594          | lincRNA          | Novel_lncRNA | chr3       | 13259055 | 13263073 | -      | 2           | 3930   | 158 |
| LNC_000190      | XLOC_047474          | antisense_lncRNA | Novel_lncRNA | chr3       | 1.39E+08 | 1.39E+08 | +      | 2           | 2813   | 131 |
| LNC_000191      | XLOC_047586          | lincRNA          | Novel_lncRNA | chr3       | 1.44E+08 | 1.44E+08 | +      | 3           | 6733   | 125 |
| LNC_000192      | XLOC_047679          | lincRNA          | Novel_lncRNA | chr3       | 1.53E+08 | 1.53E+08 | +      | 2           | 2858   | 92  |

| Novel_lncRNA ID | Novel_lncRNA Gene_ID | Gene_Type        | Status       | Chromosome | Start    | End      | Strand | Exon number | Length | ORF |
|-----------------|----------------------|------------------|--------------|------------|----------|----------|--------|-------------|--------|-----|
| LNC_000193      | XLOC_047711          | antisense_lncRNA | Novel_lncRNA | chr3       | 1.56E+08 | 1.56E+08 | +      | 3           | 2533   | 116 |
| LNC_000298      | XLOC_067846          | lincRNA          | Novel_lncRNA | chr8       | 2623434  | 2666960  | +      | 3           | 1269   | 104 |
| LNC_000208      | XLOC_051008          | lincRNA          | Novel_lncRNA | chr4       | 38155518 | 38158405 | +      | 2           | 1465   | 95  |
| LNC_000337      | XLOC_076360          | lincRNA          | Novel_lncRNA | chrX       | 275345   | 276227   | -      | 2           | 643    | 214 |
| LNC_000340      | XLOC_078144          | lincRNA          | Novel_lncRNA | chrY       | 19744977 | 19756246 | +      | 3           | 1969   | 114 |
| LNC_000260      | XLOC_059904          | lincRNA          | Novel_lncRNA | chr6       | 66259125 | 66276962 | +      | 3           | 2743   | 115 |
| LNC_000060      | XLOC_011599          | lincRNA          | Novel_lncRNA | chr11      | 65666152 | 65671704 | +      | 2           | 348    | 67  |
| LNC_000061      | XLOC_012005          | lincRNA          | Novel_lncRNA | chr11      | 88372999 | 88401040 | +      | 3           | 1776   | 112 |
| LNC_000062      | XLOC_012392          | lincRNA          | Novel_lncRNA | chr11      | 1.2E+08  | 1.2E+08  | +      | 2           | 2644   | 164 |
| LNC_000063      | XLOC_012577          | lincRNA          | Novel_lncRNA | chr11      | 1.31E+08 | 1.31E+08 | +      | 2           | 2053   | 127 |
| LNC_000064      | XLOC_012888          | antisense_lncRNA | Novel_lncRNA | chr11      | 8092360  | 8101630  | -      | 2           | 8693   | 170 |
| LNC_000065      | XLOC_012942          | lincRNA          | Novel_lncRNA | chr11      | 10927204 | 10931671 | -      | 2           | 1889   | 243 |
| LNC_000066      | XLOC_013171          | lincRNA          | Novel_lncRNA | chr11      | 35061230 | 35067730 | -      | 2           | 5134   | 171 |
| LNC_000067      | XLOC_013785          | lincRNA          | Novel_lncRNA | chr11      | 73242767 | 73243832 | -      | 2           | 736    | 97  |
| LNC_000068      | XLOC_014248          | lincRNA          | Novel_lncRNA | chr11      | 1.1E+08  | 1.1E+08  | -      | 2           | 1862   | 130 |
| LNC_000069      | XLOC_014306          | lincRNA          | Novel_lncRNA | chr11      | 1.16E+08 | 1.16E+08 | -      | 3           | 1661   | 203 |
| LNC_000101      | XLOC_022584          | lincRNA          | Novel_lncRNA | chr14      | 98319977 | 98325828 | -      | 2           | 914    | 84  |
| LNC_000100      | XLOC_022536          | lincRNA          | Novel_lncRNA | chr14      | 95383051 | 95387284 | -      | 2           | 526    | 89  |
| LNC_000107      | XLOC_024688          | lincRNA          | Novel_lncRNA | chr15      | 47998842 | 48007907 | -      | 2           | 5314   | 131 |
| LNC_000106      | XLOC_024598          | lincRNA          | Novel_lncRNA | chr15      | 40869269 | 40872020 | -      | 2           | 1249   | 152 |
| LNC_000105      | XLOC_024531          | lincRNA          | Novel_lncRNA | chr15      | 38730859 | 38751115 | -      | 3           | 1343   | 86  |
| LNC_000104      | XLOC_023709          | lincRNA          | Novel_lncRNA | chr15      | 70254976 | 70295670 | +      | 3           | 4380   | 154 |
| LNC_000262      | XLOC_060045          | lincRNA          | Novel_lncRNA | chr6       | 84430227 | 84526675 | +      | 3           | 7052   | 167 |
| LNC_000263      | XLOC_060363          | lincRNA          | Novel_lncRNA | chr6       | 1.14E+08 | 1.14E+08 | +      | 2           | 659    | 57  |

| Novel_lncRNA ID | Novel_lncRNA Gene_ID | Gene_Type        | Status       | Chromosome | Start    | End      | Strand | Exon number | Length | ORF |
|-----------------|----------------------|------------------|--------------|------------|----------|----------|--------|-------------|--------|-----|
| LNC_000209      | XLOC_051025          | lincRNA          | Novel_lncRNA | chr4       | 38750233 | 38753481 | +      | 2           | 2557   | 150 |
| LNC_000261      | XLOC_060045          | lincRNA          | Novel_lncRNA | chr6       | 84352896 | 84376675 | +      | 2           | 6258   | 162 |
| LNC_000266      | XLOC_061260          | lincRNA          | Novel_lncRNA | chr6       | 1.69E+08 | 1.69E+08 | +      | 3           | 1417   | 192 |
| LNC_000267      | XLOC_061394          | lincRNA          | Novel_lncRNA | chr6       | 3853336  | 3868716  | -      | 2           | 927    | 99  |
| LNC_000264      | XLOC_060669          | lincRNA          | Novel_lncRNA | chr6       | 1.22E+08 | 1.22E+08 | +      | 3           | 974    | 84  |
| LNC_000216      | XLOC_052343          | lincRNA          | Novel_lncRNA | chr4       | 1.66E+08 | 1.66E+08 | +      | 2           | 1581   | 161 |
| LNC_000312      | XLOC_070305          | lincRNA          | Novel_lncRNA | chr8       | 85973919 | 85978858 | -      | 3           | 2811   | 129 |
| LNC_000313      | XLOC_070305          | lincRNA          | Novel_lncRNA | chr8       | 85973919 | 85979068 | -      | 4           | 2619   | 129 |
| LNC_000268      | XLOC_061467          | lincRNA          | Novel_lncRNA | chr6       | 6873338  | 6875963  | -      | 2           | 1542   | 168 |
| LNC_000265      | XLOC_060733          | lincRNA          | Novel_lncRNA | chr6       | 1.25E+08 | 1.25E+08 | +      | 2           | 2668   | 148 |
| LNC_000316      | XLOC_070543          | lincRNA          | Novel_lncRNA | chr8       | 1.03E+08 | 1.03E+08 | -      | 2           | 1390   | 224 |
| LNC_000259      | XLOC_059702          | lincRNA          | Novel_lncRNA | chr6       | 39941935 | 39963571 | +      | 3           | 432    | 77  |
| LNC_000314      | XLOC_070305          | lincRNA          | Novel_lncRNA | chr8       | 85973919 | 85979680 | -      | 3           | 2499   | 129 |
| LNC_000315      | XLOC_070477          | antisense_lncRNA | Novel_lncRNA | chr8       | 99770190 | 99782715 | -      | 2           | 971    | 93  |
| LNC_000183      | XLOC_045217          | antisense_lncRNA | Novel_lncRNA | chr22      | 46250982 | 46256530 | +      | 3           | 1193   | 96  |
| LNC_000182      | XLOC_045171          | lincRNA          | Novel_lncRNA | chr22      | 43917617 | 43923489 | +      | 4           | 735    | 180 |
| LNC_000181      | XLOC_044588          | lincRNA          | Novel_lncRNA | chr22      | 19688129 | 19692046 | +      | 3           | 1043   | 133 |
| LNC_000180      | XLOC_044580          | lincRNA          | Novel_lncRNA | chr22      | 19291918 | 19330183 | +      | 3           | 798    | 100 |
| LNC_000187      | XLOC_046603          | lincRNA          | Novel_lncRNA | chr3       | 47185152 | 47194864 | +      | 2           | 2000   | 125 |
| LNC_000186      | XLOC_046173          | lincRNA          | Novel_lncRNA | chr3       | 12470820 | 12477582 | +      | 5           | 2119   | 155 |
| LNC_000185      | XLOC_045926          | lincRNA          | Novel_lncRNA | chr22      | 46139836 | 46144104 | -      | 2           | 1989   | 180 |
| LNC_000184      | XLOC_045667          | antisense_lncRNA | Novel_lncRNA | chr22      | 32352399 | 32355033 | -      | 2           | 803    | 126 |
| LNC_000213      | XLOC_051838          | lincRNA          | Novel_lncRNA | chr4       | 1.28E+08 | 1.28E+08 | +      | 2           | 5535   | 142 |
| LNC_000189      | XLOC_046816          | lincRNA          | Novel_lncRNA | chr3       | 71897151 | 71899277 | +      | 2           | 1370   | 113 |

| Novel_lncRNA ID | Novel_lncRNA Gene_ID | Gene_Type        | Status       | Chromosome | Start    | End      | Strand | Exon number | Length | ORF |
|-----------------|----------------------|------------------|--------------|------------|----------|----------|--------|-------------|--------|-----|
| LNC_000188      | XLOC_046740          | antisense_lncRNA | Novel_lncRNA | chr3       | 59738510 | 59756691 | +      | 2           | 2325   | 103 |
| LNC_000288      | XLOC_066001          | lincRNA          | Novel_lncRNA | chr7       | 19025604 | 19053511 | -      | 2           | 2226   | 109 |
| LNC_000310      | XLOC_070305          | lincRNA          | Novel_lncRNA | chr8       | 85973919 | 85978858 | -      | 2           | 4538   | 129 |
| LNC_000212      | XLOC_051787          | lincRNA          | Novel_lncRNA | chr4       | 1.24E+08 | 1.24E+08 | +      | 2           | 5580   | 122 |
| LNC_000324      | XLOC_072882          | lincRNA          | Novel_lncRNA | chr9       | 5576655  | 5609006  | -      | 2           | 923    | 74  |
| LNC_000335      | XLOC_075031          | lincRNA          | Novel_lncRNA | chrX       | 39337705 | 39387521 | +      | 3           | 1721   | 106 |
| LNC_000269      | XLOC_061511          | lincRNA          | Novel_lncRNA | chr6       | 10349216 | 10352060 | -      | 2           | 526    | 100 |
| LNC_000331      | XLOC_073790          | lincRNA          | Novel_lncRNA | chr9       | 87197313 | 87277293 | -      | 5           | 1712   | 132 |
| LNC_000210      | XLOC_051209          | lincRNA          | Novel_lncRNA | chr4       | 57358881 | 57372827 | +      | 2           | 6097   | 150 |
| LNC_000317      | XLOC_070768          | lincRNA          | Novel_lncRNA | chr8       | 1.27E+08 | 1.27E+08 | -      | 3           | 785    | 72  |
| LNC_000077      | XLOC_015346          | lincRNA          | Novel_lncRNA | chr12      | 41168353 | 41172291 | +      | 2           | 1927   | 100 |
| LNC_000076      | XLOC_014962          | lincRNA          | Novel_lncRNA | chr12      | 10723424 | 10726744 | +      | 2           | 1945   | 101 |
| LNC_000075      | XLOC_014943          | lincRNA          | Novel_lncRNA | chr12      | 9649568  | 9650496  | +      | 2           | 827    | 81  |
| LNC_000074      | XLOC_014918          | lincRNA          | Novel_lncRNA | chr12      | 9322031  | 9324356  | +      | 2           | 1378   | 124 |
| LNC_000073      | XLOC_014918          | lincRNA          | Novel_lncRNA | chr12      | 9321995  | 9340677  | +      | 3           | 1265   | 124 |
| LNC_000072      | XLOC_014918          | lincRNA          | Novel_lncRNA | chr12      | 9321995  | 9328034  | +      | 3           | 1410   | 124 |
| LNC_000071      | XLOC_014745          | lincRNA          | Novel_lncRNA | chr12      | 5160312  | 5273966  | +      | 6           | 853    | 99  |
| LNC_000070      | XLOC_014558          | lincRNA          | Novel_lncRNA | chr11      | 1.29E+08 | 1.29E+08 | -      | 3           | 2267   | 153 |
| LNC_000176      | XLOC_043128          | lincRNA          | Novel_lncRNA | chr20      | 51336304 | 51338483 | -      | 2           | 2090   | 120 |
| LNC_000177      | XLOC_043650          | antisense_lncRNA | Novel_lncRNA | chr21      | 37687228 | 37717235 | +      | 4           | 598    | 101 |
| LNC_000174      | XLOC_043098          | lincRNA          | Novel_lncRNA | chr20      | 47840904 | 47844401 | -      | 4           | 1146   | 162 |
| LNC_000175      | XLOC_043098          | lincRNA          | Novel_lncRNA | chr20      | 47841680 | 47844721 | -      | 3           | 1192   | 144 |
| LNC_000172      | XLOC_042939          | lincRNA          | Novel_lncRNA | chr20      | 40299720 | 40306708 | -      | 2           | 3383   | 96  |
| LNC_000173      | XLOC_043098          | lincRNA          | Novel_lncRNA | chr20      | 47840904 | 47843495 | -      | 3           | 967    | 201 |

| Novel_lncRNA ID | Novel_lncRNA Gene_ID | Gene_Type        | Status       | Chromosome | Start    | End      | Strand | Exon number | Length | ORF |
|-----------------|----------------------|------------------|--------------|------------|----------|----------|--------|-------------|--------|-----|
| LNC_000079      | XLOC_016271          | lincRNA          | Novel_lncRNA | chr12      | 1.11E+08 | 1.11E+08 | +      | 2           | 1508   | 98  |
| LNC_000078      | XLOC_015401          | lincRNA          | Novel_lncRNA | chr12      | 46090058 | 46095367 | +      | 2           | 3043   | 104 |
| LNC_000271      | XLOC_062017          | antisense_lncRNA | Novel_lncRNA | chr6       | 36240436 | 36268388 | -      | 8           | 4100   | 141 |
| LNC_000270      | XLOC_061815          | lincRNA          | Novel_lncRNA | chr6       | 29489928 | 29494143 | -      | 2           | 1742   | 132 |
| LNC_000273      | XLOC_062461          | lincRNA          | Novel_lncRNA | chr6       | 75024612 | 75076296 | -      | 2           | 2249   | 93  |
| LNC_000272      | XLOC_062079          | lincRNA          | Novel_lncRNA | chr6       | 40886426 | 40889784 | -      | 2           | 1528   | 89  |
| LNC_000275      | XLOC_062527          | lincRNA          | Novel_lncRNA | chr6       | 77270389 | 77369159 | -      | 3           | 1660   | 140 |
| LNC_000274      | XLOC_062527          | lincRNA          | Novel_lncRNA | chr6       | 77143552 | 77316705 | -      | 5           | 8390   | 105 |
| LNC_000277      | XLOC_063439          | lincRNA          | Novel_lncRNA | chr6       | 1.56E+08 | 1.56E+08 | -      | 2           | 3952   | 119 |
| LNC_000276      | XLOC_062825          | lincRNA          | Novel_lncRNA | chr6       | 1E+08    | 1E+08    | -      | 2           | 1726   | 111 |
| LNC_000279      | XLOC_063841          | lincRNA          | Novel_lncRNA | chr7       | 7819380  | 7820193  | +      | 2           | 751    | 85  |
| LNC_000278      | XLOC_063610          | lincRNA          | Novel_lncRNA | chr6       | 1.68E+08 | 1.68E+08 | -      | 2           | 2446   | 121 |
| LNC_000303      | XLOC_069485          | lincRNA          | Novel_lncRNA | chr8       | 6858787  | 6865615  | -      | 2           | 622    | 75  |
| LNC_000242      | XLOC_056704          | lincRNA          | Novel_lncRNA | chr5       | 859255   | 860880   | -      | 2           | 1530   | 158 |
| LNC_000305      | XLOC_069585          | antisense_lncRNA | Novel_lncRNA | chr8       | 10674576 | 10681882 | -      | 3           | 4675   | 251 |
| LNC_000304      | XLOC_069485          | lincRNA          | Novel_lncRNA | chr8       | 6860508  | 6865568  | -      | 2           | 2035   | 158 |
| LNC_000307      | XLOC_069585          | antisense_lncRNA | Novel_lncRNA | chr8       | 10674576 | 10682758 | -      | 3           | 5483   | 251 |
| LNC_000306      | XLOC_069585          | antisense_lncRNA | Novel_lncRNA | chr8       | 10674576 | 10681886 | -      | 2           | 7050   | 251 |
| LNC_000219      | XLOC_052817          | lincRNA          | Novel_lncRNA | chr4       | 9598987  | 9605321  | -      | 2           | 2673   | 93  |
| LNC_000218      | XLOC_052525          | lincRNA          | Novel_lncRNA | chr4       | 1.84E+08 | 1.84E+08 | +      | 2           | 1281   | 82  |
| LNC_000318      | XLOC_070932          | lincRNA          | Novel_lncRNA | chr8       | 1.45E+08 | 1.45E+08 | -      | 2           | 1466   | 115 |
| LNC_000332      | XLOC_073790          | lincRNA          | Novel_lncRNA | chr9       | 87197313 | 87277322 | -      | 6           | 1873   | 132 |
| LNC_000323      | XLOC_072856          | lincRNA          | Novel_lncRNA | chr9       | 4879462  | 4887713  | -      | 2           | 1430   | 132 |
| LNC_000289      | XLOC_066309          | lincRNA          | Novel_lncRNA | chr7       | 44375008 | 44378887 | -      | 2           | 3061   | 176 |

| Novel_lncRNA<br>ID | Novel_lncRNA<br>Gene_ID | Gene_Type        | Status       | Chromosome | Start    | End      | Strand | Exon<br>number | Length | ORF |
|--------------------|-------------------------|------------------|--------------|------------|----------|----------|--------|----------------|--------|-----|
| LNC_000322         | XLOC_072529             | lincRNA          | Novel_lncRNA | chr9       | 1.22E+08 | 1.22E+08 | +      | 2              | 1016   | 115 |
| LNC_000339         | XLOC_077966             | lincRNA          | Novel_lncRNA | chrY       | 7091959  | 7098262  | +      | 2              | 6061   | 151 |
| LNC_000321         | XLOC_071884             | antisense_lncRNA | Novel_lncRNA | chr9       | 70601713 | 70604529 | +      | 2              | 1546   | 119 |
| LNC_000320         | XLOC_071282             | lincRNA          | Novel_lncRNA | chr9       | 29566868 | 29575210 | +      | 2              | 1346   | 84  |
| LNC_000169         | XLOC_042469             | lincRNA          | Novel_lncRNA | chr20      | 1860128  | 1875849  | -      | 3              | 7694   | 177 |
| LNC_000168         | XLOC_042436             | lincRNA          | Novel_lncRNA | chr20      | 1413752  | 1418936  | -      | 3              | 759    | 64  |
| LNC_000165         | XLOC_042274             | lincRNA          | Novel_lncRNA | chr20      | 56975139 | 56978703 | +      | 3              | 1217   | 197 |
| LNC_000164         | XLOC_042202             | lincRNA          | Novel_lncRNA | chr20      | 51349769 | 51367200 | +      | 2              | 1043   | 112 |
| LNC_000167         | XLOC_042335             | lincRNA          | Novel_lncRNA | chr20      | 60060955 | 60067655 | +      | 2              | 5562   | 154 |
| LNC_000166         | XLOC_042300             | lincRNA          | Novel_lncRNA | chr20      | 58622893 | 58626352 | +      | 2              | 1518   | 195 |
| LNC_000161         | XLOC_041654             | lincRNA          | Novel_lncRNA | chr20      | 11375792 | 11433037 | +      | 2              | 1314   | 100 |
| LNC_000160         | XLOC_040607             | lincRNA          | Novel_lncRNA | chr2       | 1.71E+08 | 1.71E+08 | -      | 2              | 2370   | 93  |
| LNC_000163         | XLOC_042040             | lincRNA          | Novel_lncRNA | chr20      | 40656738 | 40679878 | +      | 2              | 735    | 135 |
| LNC_000162         | XLOC_041665             | lincRNA          | Novel_lncRNA | chr20      | 11943147 | 11944726 | +      | 2              | 1094   | 97  |
| LNC_000002         | XLOC_000119             | lincRNA          | Novel_lncRNA | GL000219.1 | 48990    | 51090    | -      | 2              | 1995   | 150 |
| LNC_000003         | XLOC_000348             | lincRNA          | Novel_lncRNA | KI270742.1 | 20129    | 34973    | -      | 2              | 4305   | 145 |
| LNC_000246         | XLOC_057913             | lincRNA          | Novel_lncRNA | chr5       | 1.09E+08 | 1.09E+08 | -      | 2              | 1402   | 92  |
| LNC_000001         | XLOC_000086             | lincRNA          | Novel_lncRNA | GL000205.2 | 137757   | 140747   | -      | 2              | 721    | 111 |
| LNC_000006         | XLOC_001537             | lincRNA          | Novel_lncRNA | chr1       | 58718104 | 58751903 | +      | 2              | 1718   | 95  |
| LNC_000007         | XLOC_001759             | lincRNA          | Novel_lncRNA | chr1       | 78667025 | 78672485 | +      | 2              | 5354   | 117 |
| LNC_000004         | XLOC_000376             | lincRNA          | Novel_lncRNA | KI270744.1 | 41741    | 44618    | +      | 2              | 1334   | 118 |
| LNC_000005         | XLOC_000466             | lincRNA          | Novel_lncRNA | chr1       | 2215380  | 2216345  | +      | 2              | 780    | 187 |
| LNC_000334         | XLOC_075028             | lincRNA          | Novel_lncRNA | chrX       | 39017187 | 39020435 | +      | 2              | 1740   | 91  |
| LNC_000247         | XLOC_058349             | lincRNA          | Novel_lncRNA | chr5       | 1.45E+08 | 1.45E+08 | -      | 3              | 4215   | 169 |

| Novel_lncRNA ID | Novel_lncRNA Gene_ID | Gene_Type        | Status       | Chromosome | Start    | End      | Strand | Exon number | Length | ORF |
|-----------------|----------------------|------------------|--------------|------------|----------|----------|--------|-------------|--------|-----|
| LNC_000008      | XLOC_001903          | lincRNA          | Novel_lncRNA | chr1       | 94563192 | 94636988 | +      | 2           | 1620   | 135 |
| LNC_000009      | XLOC_001910          | lincRNA          | Novel_lncRNA | chr1       | 95092493 | 95094817 | +      | 2           | 1327   | 101 |
| LNC_000248      | XLOC_058349          | lincRNA          | Novel_lncRNA | chr5       | 1.45E+08 | 1.45E+08 | -      | 2           | 2855   | 148 |
| LNC_000249      | XLOC_058402          | lincRNA          | Novel_lncRNA | chr5       | 1.46E+08 | 1.46E+08 | -      | 2           | 3437   | 94  |
| LNC_000237      | XLOC_056320          | lincRNA          | Novel_lncRNA | chr5       | 1.53E+08 | 1.53E+08 | +      | 5           | 3429   | 110 |
| LNC_000333      | XLOC_074661          | lincRNA          | Novel_lncRNA | chrX       | 1240670  | 1250042  | +      | 2           | 1583   | 124 |
| LNC_000088      | XLOC_018890          | lincRNA          | Novel_lncRNA | chr13      | 80757216 | 80824945 | +      | 4           | 1510   | 114 |
| LNC_000089      | XLOC_019043          | lincRNA          | Novel_lncRNA | chr13      | 98784933 | 98787957 | +      | 2           | 1912   | 160 |
| LNC_000233      | XLOC_055734          | lincRNA          | Novel_lncRNA | chr5       | 1.16E+08 | 1.16E+08 | +      | 2           | 865    | 130 |
| LNC_000082      | XLOC_017266          | antisense_lncRNA | Novel_lncRNA | chr12      | 53117316 | 53123580 | -      | 2           | 1337   | 172 |
| LNC_000083      | XLOC_017609          | antisense_lncRNA | Novel_lncRNA | chr12      | 80315839 | 80319218 | -      | 2           | 2468   | 94  |
| LNC_000080      | XLOC_016795          | lincRNA          | Novel_lncRNA | chr12      | 12968124 | 12974341 | -      | 2           | 2316   | 127 |
| LNC_000081      | XLOC_016984          | lincRNA          | Novel_lncRNA | chr12      | 31750349 | 31753330 | -      | 2           | 1188   | 97  |
| LNC_000086      | XLOC_018334          | lincRNA          | Novel_lncRNA | chr13      | 20295682 | 20326221 | +      | 3           | 1063   | 129 |
| LNC_000087      | XLOC_018632          | lincRNA          | Novel_lncRNA | chr13      | 48581111 | 48599869 | +      | 3           | 971    | 159 |
| LNC_000084      | XLOC_017749          | lincRNA          | Novel_lncRNA | chr12      | 94701555 | 94711863 | -      | 2           | 7789   | 140 |
| LNC_000085      | XLOC_018227          | lincRNA          | Novel_lncRNA | chr12      | 1.31E+08 | 1.31E+08 | -      | 2           | 1267   | 157 |
| LNC_000206      | XLOC_050889          | lincRNA          | Novel_lncRNA | chr4       | 14271127 | 14274816 | +      | 2           | 3585   | 117 |
| LNC_000327      | XLOC_073141          | lincRNA          | Novel_lncRNA | chr9       | 23684973 | 23688844 | -      | 2           | 3381   | 86  |
| LNC_000293      | XLOC_066867          | lincRNA          | Novel_lncRNA | chr7       | 91515050 | 91555096 | -      | 3           | 711    | 82  |
| LNC_000207      | XLOC_050903          | lincRNA          | Novel_lncRNA | chr4       | 14894093 | 14909459 | +      | 3           | 442    | 111 |
| LNC_000236      | XLOC_056273          | lincRNA          | Novel_lncRNA | chr5       | 1.49E+08 | 1.49E+08 | +      | 2           | 999    | 102 |
| LNC_000292      | XLOC_066753          | lincRNA          | Novel_lncRNA | chr7       | 81250801 | 81267568 | -      | 2           | 1459   | 104 |
| LNC_000150      | XLOC_039013          | lincRNA          | Novel_lncRNA | chr2       | 44267378 | 44270751 | -      | 2           | 1704   | 121 |

| Novel_lncRNA ID | Novel_lncRNA Gene_ID | Gene_Type        | Status       | Chromosome | Start    | End      | Strand | Exon number | Length | ORF |
|-----------------|----------------------|------------------|--------------|------------|----------|----------|--------|-------------|--------|-----|
| LNC_000151      | XLOC_039197          | lincRNA          | Novel_lncRNA | chr2       | 60336696 | 60339790 | -      | 2           | 2214   | 119 |
| LNC_000152      | XLOC_039388          | lincRNA          | Novel_lncRNA | chr2       | 72009746 | 72015293 | -      | 2           | 4687   | 147 |
| LNC_000153      | XLOC_039388          | lincRNA          | Novel_lncRNA | chr2       | 72009746 | 72033469 | -      | 3           | 5202   | 194 |
| LNC_000154      | XLOC_039388          | lincRNA          | Novel_lncRNA | chr2       | 72009746 | 72034055 | -      | 2           | 6498   | 223 |
| LNC_000155      | XLOC_039530          | lincRNA          | Novel_lncRNA | chr2       | 88136485 | 88138896 | -      | 2           | 1379   | 96  |
| LNC_000156      | XLOC_039540          | lincRNA          | Novel_lncRNA | chr2       | 88688244 | 88691466 | -      | 2           | 777    | 134 |
| LNC_000157      | XLOC_040152          | lincRNA          | Novel_lncRNA | chr2       | 1.38E+08 | 1.38E+08 | -      | 4           | 965    | 95  |
| LNC_000158      | XLOC_040301          | lincRNA          | Novel_lncRNA | chr2       | 1.51E+08 | 1.51E+08 | -      | 3           | 6133   | 106 |
| LNC_000159      | XLOC_040444          | lincRNA          | Novel_lncRNA | chr2       | 1.57E+08 | 1.57E+08 | -      | 2           | 2519   | 156 |
| LNC_000251      | XLOC_058686          | lincRNA          | Novel_lncRNA | chr5       | 1.69E+08 | 1.69E+08 | -      | 2           | 3649   | 141 |
| LNC_000250      | XLOC_058535          | lincRNA          | Novel_lncRNA | chr5       | 1.52E+08 | 1.52E+08 | -      | 2           | 496    | 65  |
| LNC_000257      | XLOC_059453          | lincRNA          | Novel_lncRNA | chr6       | 29945966 | 29949287 | +      | 2           | 2376   | 157 |
| LNC_000256      | XLOC_059203          | lincRNA          | Novel_lncRNA | chr6       | 14431743 | 14463397 | +      | 2           | 6755   | 102 |
| LNC_000255      | XLOC_059131          | lincRNA          | Novel_lncRNA | chr6       | 8788752  | 8792275  | +      | 2           | 2014   | 120 |
| LNC_000254      | XLOC_059018          | lincRNA          | Novel_lncRNA | chr6       | 4635989  | 4637950  | +      | 2           | 1508   | 122 |
| LNC_000011      | XLOC_002195          | lincRNA          | Novel_lncRNA | chr1       | 1.17E+08 | 1.17E+08 | +      | 2           | 1625   | 119 |
| LNC_000010      | XLOC_002130          | lincRNA          | Novel_lncRNA | chr1       | 1.13E+08 | 1.13E+08 | +      | 2           | 1300   | 177 |
| LNC_000013      | XLOC_002479          | lincRNA          | Novel_lncRNA | chr1       | 1.52E+08 | 1.52E+08 | +      | 2           | 2656   | 90  |
| LNC_000012      | XLOC_002397          | lincRNA          | Novel_lncRNA | chr1       | 1.49E+08 | 1.49E+08 | +      | 2           | 1465   | 99  |
| LNC_000015      | XLOC_002571          | lincRNA          | Novel_lncRNA | chr1       | 1.55E+08 | 1.55E+08 | +      | 3           | 1334   | 128 |
| LNC_000014      | XLOC_002534          | antisense_lncRNA | Novel_lncRNA | chr1       | 1.54E+08 | 1.54E+08 | +      | 2           | 1345   | 94  |
| LNC_000017      | XLOC_002999          | lincRNA          | Novel_lncRNA | chr1       | 1.84E+08 | 1.84E+08 | +      | 4           | 1178   | 78  |
| LNC_000016      | XLOC_002901          | lincRNA          | Novel_lncRNA | chr1       | 1.79E+08 | 1.79E+08 | +      | 2           | 936    | 153 |
| LNC_000019      | XLOC_003421          | lincRNA          | Novel_lncRNA | chr1       | 2.19E+08 | 2.19E+08 | +      | 2           | 931    | 116 |



| Novel_lncRNA ID | Novel_lncRNA Gene_ID | Gene_Type        | Status       | Chromosome | Start    | End      | Strand | Exon number | Length | ORF |
|-----------------|----------------------|------------------|--------------|------------|----------|----------|--------|-------------|--------|-----|
| LNC_000018      | XLOC_003268          | lincRNA          | Novel_lncRNA | chr1       | 2.05E+08 | 2.05E+08 | +      | 2           | 1763   | 119 |
| LNC_000329      | XLOC_073645          | antisense_lncRNA | Novel_lncRNA | chr9       | 69130999 | 69171123 | -      | 2           | 511    | 77  |
| LNC_000328      | XLOC_073337          | lincRNA          | Novel_lncRNA | chr9       | 36477502 | 36482010 | -      | 2           | 762    | 70  |
| LNC_000258      | XLOC_059651          | lincRNA          | Novel_lncRNA | chr6       | 36122479 | 36124122 | +      | 2           | 946    | 136 |
| LNC_000099      | XLOC_022153          | lincRNA          | Novel_lncRNA | chr14      | 63155186 | 63158426 | -      | 2           | 2285   | 149 |
| LNC_000098      | XLOC_021043          | lincRNA          | Novel_lncRNA | chr14      | 63197439 | 63202289 | +      | 2           | 1653   | 98  |
| LNC_000341      | XLOC_078297          | lincRNA          | Novel_lncRNA | chrY       | 7820917  | 7823136  | -      | 3           | 1332   | 101 |
| LNC_000091      | XLOC_019789          | lincRNA          | Novel_lncRNA | chr13      | 73582065 | 73593789 | -      | 2           | 1247   | 79  |
| LNC_000090      | XLOC_019582          | lincRNA          | Novel_lncRNA | chr13      | 45306830 | 45329776 | -      | 2           | 1039   | 106 |
| LNC_000093      | XLOC_019982          | lincRNA          | Novel_lncRNA | chr13      | 85966270 | 85996026 | -      | 3           | 996    | 118 |
| LNC_000092      | XLOC_019894          | lincRNA          | Novel_lncRNA | chr13      | 77353401 | 77375044 | -      | 2           | 1002   | 109 |
| LNC_000095      | XLOC_020130          | lincRNA          | Novel_lncRNA | chr13      | 1.06E+08 | 1.06E+08 | -      | 2           | 2962   | 82  |
| LNC_000094      | XLOC_019982          | lincRNA          | Novel_lncRNA | chr13      | 85966270 | 85997935 | -      | 2           | 1229   | 118 |
| LNC_000097      | XLOC_021040          | lincRNA          | Novel_lncRNA | chr14      | 63178163 | 63181409 | +      | 2           | 2336   | 160 |
| LNC_000096      | XLOC_021031          | lincRNA          | Novel_lncRNA | chr14      | 61113797 | 61121082 | +      | 2           | 6986   | 178 |
| LNC_000244      | XLOC_056804          | lincRNA          | Novel_lncRNA | chr5       | 6515735  | 6517187  | -      | 2           | 584    | 71  |
| LNC_000325      | XLOC_072984          | lincRNA          | Novel_lncRNA | chr9       | 13881674 | 14018300 | -      | 7           | 1074   | 94  |
| LNC_000245      | XLOC_057280          | lincRNA          | Novel_lncRNA | chr5       | 60503438 | 60505554 | -      | 2           | 1141   | 98  |
| LNC_000220      | XLOC_052859          | lincRNA          | Novel_lncRNA | chr4       | 12887752 | 12892857 | -      | 2           | 2706   | 100 |
| LNC_000147      | XLOC_037982          | lincRNA          | Novel_lncRNA | chr2       | 2.17E+08 | 2.17E+08 | +      | 4           | 1250   | 96  |
| LNC_000146      | XLOC_036816          | lincRNA          | Novel_lncRNA | chr2       | 1.22E+08 | 1.22E+08 | +      | 2           | 1485   | 122 |
| LNC_000145      | XLOC_036743          | lincRNA          | Novel_lncRNA | chr2       | 1.22E+08 | 1.22E+08 | +      | 2           | 1411   | 172 |
| LNC_000144      | XLOC_036634          | lincRNA          | Novel_lncRNA | chr2       | 1.18E+08 | 1.18E+08 | +      | 2           | 4302   | 128 |
| LNC_000143      | XLOC_036634          | lincRNA          | Novel_lncRNA | chr2       | 1.18E+08 | 1.18E+08 | +      | 2           | 4288   | 128 |

| Novel_lncRNA ID | Novel_lncRNA Gene_ID | Gene_Type        | Status       | Chromosome | Start    | End      | Strand | Exon number | Length | ORF |
|-----------------|----------------------|------------------|--------------|------------|----------|----------|--------|-------------|--------|-----|
| LNC_000142      | XLOC_035982          | lincRNA          | Novel_lncRNA | chr2       | 71696870 | 71743896 | +      | 2           | 1218   | 121 |
| LNC_000141      | XLOC_035660          | lincRNA          | Novel_lncRNA | chr2       | 40717091 | 40721349 | +      | 2           | 2732   | 105 |
| LNC_000140      | XLOC_035648          | lincRNA          | Novel_lncRNA | chr2       | 39465593 | 39466902 | +      | 2           | 1172   | 195 |
| LNC_000226      | XLOC_053612          | lincRNA          | Novel_lncRNA | chr4       | 84526892 | 84542704 | -      | 5           | 2237   | 80  |
| LNC_000227      | XLOC_054500          | lincRNA          | Novel_lncRNA | chr4       | 1.85E+08 | 1.85E+08 | -      | 2           | 2617   | 160 |
| LNC_000224      | XLOC_053509          | lincRNA          | Novel_lncRNA | chr4       | 75178672 | 75181073 | -      | 3           | 544    | 131 |
| LNC_000225      | XLOC_053612          | lincRNA          | Novel_lncRNA | chr4       | 84526892 | 84538511 | -      | 3           | 1890   | 70  |
| LNC_000222      | XLOC_053170          | antisense_lncRNA | Novel_lncRNA | chr4       | 37602311 | 37603777 | -      | 2           | 1383   | 122 |
| LNC_000223      | XLOC_053220          | lincRNA          | Novel_lncRNA | chr4       | 41910873 | 41934652 | -      | 3           | 803    | 93  |
| LNC_000149      | XLOC_038926          | lincRNA          | Novel_lncRNA | chr2       | 38186592 | 38193192 | -      | 2           | 1087   | 91  |
| LNC_000148      | XLOC_038906          | antisense_lncRNA | Novel_lncRNA | chr2       | 36518290 | 36528589 | -      | 2           | 1516   | 80  |
| LNC_000024      | XLOC_004009          | lincRNA          | Novel_lncRNA | chr1       | 5766803  | 5771462  | -      | 2           | 1627   | 106 |
| LNC_000025      | XLOC_004012          | lincRNA          | Novel_lncRNA | chr1       | 5855250  | 5861992  | -      | 2           | 6238   | 251 |
| LNC_000026      | XLOC_005313          | lincRNA          | Novel_lncRNA | chr1       | 91544894 | 91569495 | -      | 4           | 2811   | 183 |
| LNC_000027      | XLOC_005944          | antisense_lncRNA | Novel_lncRNA | chr1       | 1.53E+08 | 1.53E+08 | -      | 3           | 4315   | 125 |
| LNC_000020      | XLOC_003421          | lincRNA          | Novel_lncRNA | chr1       | 2.19E+08 | 2.19E+08 | +      | 2           | 825    | 108 |
| LNC_000021      | XLOC_003434          | lincRNA          | Novel_lncRNA | chr1       | 2.19E+08 | 2.19E+08 | +      | 2           | 2464   | 110 |
| LNC_000022      | XLOC_003928          | lincRNA          | Novel_lncRNA | chr1       | 1381875  | 1383115  | -      | 2           | 1049   | 109 |
| LNC_000023      | XLOC_004009          | lincRNA          | Novel_lncRNA | chr1       | 5766803  | 5771454  | -      | 2           | 1624   | 106 |
| LNC_000243      | XLOC_056803          | lincRNA          | Novel_lncRNA | chr5       | 6510524  | 6512801  | -      | 2           | 1243   | 104 |
| LNC_000028      | XLOC_005944          | antisense_lncRNA | Novel_lncRNA | chr1       | 1.53E+08 | 1.53E+08 | -      | 4           | 3148   | 125 |
| LNC_000029      | XLOC_005944          | antisense_lncRNA | Novel_lncRNA | chr1       | 1.53E+08 | 1.53E+08 | -      | 5           | 3217   | 125 |
| LNC_000280      | XLOC_063904          | lincRNA          | Novel_lncRNA | chr7       | 11250465 | 11252721 | +      | 2           | 1478   | 80  |
| LNC_000338      | XLOC_076537          | antisense_lncRNA | Novel_lncRNA | chrX       | 14691712 | 14757825 | -      | 3           | 955    | 119 |

| Novel_lncRNA ID | Novel_lncRNA Gene_ID | Gene_Type        | Status       | Chromosome | Start    | End      | Strand | Exon number | Length | ORF |
|-----------------|----------------------|------------------|--------------|------------|----------|----------|--------|-------------|--------|-----|
| LNC_000281      | XLOC_063998          | lincRNA          | Novel_lncRNA | chr7       | 16990248 | 17033228 | +      | 2           | 11910  | 112 |
| LNC_000336      | XLOC_075959          | lincRNA          | Novel_lncRNA | chrX       | 1.27E+08 | 1.27E+08 | +      | 2           | 394    | 62  |
| LNC_000240      | XLOC_056599          | lincRNA          | Novel_lncRNA | chr5       | 1.78E+08 | 1.78E+08 | +      | 3           | 989    | 163 |
| LNC_000326      | XLOC_072984          | lincRNA          | Novel_lncRNA | chr9       | 13939786 | 14018824 | -      | 7           | 1224   | 83  |
| LNC_000241      | XLOC_056617          | lincRNA          | Novel_lncRNA | chr5       | 1.79E+08 | 1.79E+08 | +      | 3           | 1077   | 106 |
| LNC_000232      | XLOC_055330          | lincRNA          | Novel_lncRNA | chr5       | 79547316 | 79579557 | +      | 3           | 1671   | 121 |
| LNC_000178      | XLOC_043785          | lincRNA          | Novel_lncRNA | chr21      | 44748926 | 44752598 | +      | 2           | 2881   | 245 |
| LNC_000330      | XLOC_073790          | lincRNA          | Novel_lncRNA | chr9       | 87195383 | 87198243 | -      | 2           | 1205   | 89  |
| LNC_000179      | XLOC_043844          | lincRNA          | Novel_lncRNA | chr21      | 6359083  | 6376027  | -      | 2           | 2077   | 170 |
| LNC_000253      | XLOC_058927          | lincRNA          | Novel_lncRNA | chr6       | 744937   | 747527   | +      | 2           | 1368   | 145 |
| LNC_000285      | XLOC_064785          | lincRNA          | Novel_lncRNA | chr7       | 76786514 | 76822133 | +      | 2           | 2214   | 103 |
| LNC_000299      | XLOC_067871          | antisense_lncRNA | Novel_lncRNA | chr8       | 6542681  | 6551374  | +      | 2           | 8549   | 149 |
| LNC_000235      | XLOC_056256          | lincRNA          | Novel_lncRNA | chr5       | 1.48E+08 | 1.48E+08 | +      | 2           | 719    | 98  |
| LNC_000039      | XLOC_007520          | lincRNA          | Novel_lncRNA | chr10      | 10798332 | 10847120 | +      | 2           | 1544   | 130 |
| LNC_000038      | XLOC_007429          | antisense_lncRNA | Novel_lncRNA | chr10      | 4871347  | 4929712  | +      | 3           | 2088   | 87  |
| LNC_000239      | XLOC_056439          | lincRNA          | Novel_lncRNA | chr5       | 1.61E+08 | 1.61E+08 | +      | 3           | 1773   | 117 |
| LNC_000238      | XLOC_056320          | lincRNA          | Novel_lncRNA | chr5       | 1.53E+08 | 1.53E+08 | +      | 2           | 3129   | 110 |
| LNC_000234      | XLOC_056024          | lincRNA          | Novel_lncRNA | chr5       | 1.29E+08 | 1.29E+08 | +      | 2           | 1542   | 92  |
| LNC_000033      | XLOC_006163          | antisense_lncRNA | Novel_lncRNA | chr1       | 1.6E+08  | 1.6E+08  | -      | 2           | 1642   | 163 |
| LNC_000032      | XLOC_006151          | antisense_lncRNA | Novel_lncRNA | chr1       | 1.6E+08  | 1.6E+08  | -      | 2           | 975    | 120 |
| LNC_000031      | XLOC_006149          | lincRNA          | Novel_lncRNA | chr1       | 1.6E+08  | 1.6E+08  | -      | 2           | 1579   | 98  |
| LNC_000030      | XLOC_005944          | antisense_lncRNA | Novel_lncRNA | chr1       | 1.53E+08 | 1.53E+08 | -      | 3           | 7511   | 166 |
| LNC_000037      | XLOC_007418          | lincRNA          | Novel_lncRNA | chr10      | 3961761  | 3964937  | +      | 2           | 2153   | 113 |
| LNC_000036      | XLOC_007130          | lincRNA          | Novel_lncRNA | chr1       | 2.31E+08 | 2.31E+08 | -      | 2           | 326    | 70  |

| Novel_lncRNA ID | Novel_lncRNA Gene_ID | Gene_Type        | Status       | Chromosome | Start    | End      | Strand | Exon number | Length | ORF |
|-----------------|----------------------|------------------|--------------|------------|----------|----------|--------|-------------|--------|-----|
| LNC_000035      | XLOC_007130          | lincRNA          | Novel_lncRNA | chr1       | 2.31E+08 | 2.31E+08 | -      | 2           | 396    | 70  |
| LNC_000034      | XLOC_006923          | lincRNA          | Novel_lncRNA | chr1       | 2.21E+08 | 2.22E+08 | -      | 2           | 624    | 65  |
| LNC_000132      | XLOC_032497          | antisense_lncRNA | Novel_lncRNA | chr19      | 8415767  | 8417033  | +      | 2           | 491    | 84  |
| LNC_000133      | XLOC_032873          | lincRNA          | Novel_lncRNA | chr19      | 23986237 | 23997129 | +      | 4           | 1732   | 144 |
| LNC_000130      | XLOC_032242          | lincRNA          | Novel_lncRNA | chr18      | 73400378 | 73691258 | -      | 6           | 1385   | 273 |
| LNC_000131      | XLOC_032242          | lincRNA          | Novel_lncRNA | chr18      | 73647032 | 73655335 | -      | 3           | 1587   | 273 |
| LNC_000136      | XLOC_034343          | lincRNA          | Novel_lncRNA | chr19      | 27724462 | 27729938 | -      | 2           | 4648   | 108 |
| LNC_000137      | XLOC_034673          | antisense_lncRNA | Novel_lncRNA | chr19      | 43414732 | 43436845 | -      | 3           | 821    | 122 |
| LNC_000134      | XLOC_033218          | antisense_lncRNA | Novel_lncRNA | chr19      | 42870736 | 42912933 | +      | 2           | 3387   | 196 |
| LNC_000135      | XLOC_033399          | lincRNA          | Novel_lncRNA | chr19      | 49221866 | 49236637 | +      | 2           | 441    | 79  |
| LNC_000231      | XLOC_055235          | lincRNA          | Novel_lncRNA | chr5       | 70865159 | 70868674 | +      | 2           | 941    | 127 |
| LNC_000138      | XLOC_035235          | lincRNA          | Novel_lncRNA | chr2       | 9752906  | 9757273  | +      | 2           | 3266   | 175 |
| LNC_000139      | XLOC_035415          | lincRNA          | Novel_lncRNA | chr2       | 21266177 | 21286838 | +      | 2           | 2212   | 99  |
| LNC_000252      | XLOC_058744          | lincRNA          | Novel_lncRNA | chr5       | 1.74E+08 | 1.74E+08 | -      | 2           | 1480   | 125 |
| LNC_000230      | XLOC_054777          | lincRNA          | Novel_lncRNA | chr5       | 14888694 | 14889945 | +      | 2           | 766    | 117 |
| LNC_000170      | XLOC_042620          | lincRNA          | Novel_lncRNA | chr20      | 17815797 | 17829728 | -      | 2           | 696    | 101 |
| LNC_000171      | XLOC_042733          | lincRNA          | Novel_lncRNA | chr20      | 24878892 | 24887427 | -      | 2           | 7787   | 137 |
| LNC_000309      | XLOC_069864          | lincRNA          | Novel_lncRNA | chr8       | 36959822 | 36981870 | -      | 4           | 1352   | 112 |
| LNC_000308      | XLOC_069711          | antisense_lncRNA | Novel_lncRNA | chr8       | 19390895 | 19403126 | -      | 3           | 1032   | 123 |
| LNC_000200      | XLOC_050257          | lincRNA          | Novel_lncRNA | chr3       | 1.77E+08 | 1.77E+08 | -      | 2           | 3722   | 105 |
| LNC_000201      | XLOC_050458          | lincRNA          | Novel_lncRNA | chr3       | 1.96E+08 | 1.96E+08 | -      | 2           | 5324   | 279 |
| LNC_000202      | XLOC_050625          | lincRNA          | Novel_lncRNA | chr4       | 2621141  | 2623482  | +      | 2           | 861    | 95  |
| LNC_000203      | XLOC_050697          | lincRNA          | Novel_lncRNA | chr4       | 4755576  | 4764792  | +      | 2           | 8331   | 134 |
| LNC_000204      | XLOC_050735          | lincRNA          | Novel_lncRNA | chr4       | 6763518  | 6765347  | +      | 2           | 431    | 79  |

| Novel_lncRNA ID | Novel_lncRNA Gene_ID | Gene_Type        | Status       | Chromosome | Start    | End      | Strand | Exon number | Length | ORF |
|-----------------|----------------------|------------------|--------------|------------|----------|----------|--------|-------------|--------|-----|
| LNC_000205      | XLOC_050838          | lincRNA          | Novel_lncRNA | chr4       | 11328629 | 11337686 | +      | 3           | 515    | 92  |
| LNC_000048      | XLOC_009036          | lincRNA          | Novel_lncRNA | chr10      | 3754601  | 3758746  | -      | 3           | 2282   | 163 |
| LNC_000049      | XLOC_009083          | lincRNA          | Novel_lncRNA | chr10      | 6255493  | 6256589  | -      | 2           | 621    | 132 |
| LNC_000046      | XLOC_008685          | antisense_lncRNA | Novel_lncRNA | chr10      | 1.14E+08 | 1.14E+08 | +      | 2           | 342    | 63  |
| LNC_000047      | XLOC_009031          | lincRNA          | Novel_lncRNA | chr10      | 3462440  | 3467750  | -      | 2           | 3968   | 161 |
| LNC_000044      | XLOC_008644          | lincRNA          | Novel_lncRNA | chr10      | 1.11E+08 | 1.11E+08 | +      | 3           | 1900   | 133 |
| LNC_000045      | XLOC_008685          | antisense_lncRNA | Novel_lncRNA | chr10      | 1.14E+08 | 1.14E+08 | +      | 3           | 505    | 92  |
| LNC_000042      | XLOC_008208          | antisense_lncRNA | Novel_lncRNA | chr10      | 76348631 | 76354723 | +      | 2           | 6000   | 123 |
| LNC_000043      | XLOC_008644          | lincRNA          | Novel_lncRNA | chr10      | 1.11E+08 | 1.11E+08 | +      | 4           | 11786  | 151 |
| LNC_000040      | XLOC_007917          | lincRNA          | Novel_lncRNA | chr10      | 47207444 | 47225226 | +      | 4           | 941    | 105 |
| LNC_000041      | XLOC_008034          | lincRNA          | Novel_lncRNA | chr10      | 63630323 | 63634497 | +      | 2           | 1241   | 248 |
| LNC_000121      | XLOC_028742          | lincRNA          | Novel_lncRNA | chr17      | 42913899 | 42923510 | +      | 2           | 1238   | 93  |
| LNC_000120      | XLOC_027950          | lincRNA          | Novel_lncRNA | chr16      | 89604404 | 89606206 | -      | 2           | 1676   | 251 |
| LNC_000123      | XLOC_029417          | lincRNA          | Novel_lncRNA | chr17      | 83052518 | 83055072 | +      | 2           | 2198   | 170 |
| LNC_000122      | XLOC_029206          | lincRNA          | Novel_lncRNA | chr17      | 73955433 | 73959260 | +      | 2           | 977    | 174 |
| LNC_000125      | XLOC_030446          | lincRNA          | Novel_lncRNA | chr17      | 50886283 | 50893548 | -      | 2           | 1646   | 112 |
| LNC_000124      | XLOC_029447          | lincRNA          | Novel_lncRNA | chr17      | 198759   | 201400   | -      | 2           | 2238   | 125 |
| LNC_000127      | XLOC_030980          | lincRNA          | Novel_lncRNA | chr18      | 10561662 | 10566861 | +      | 2           | 4364   | 188 |
| LNC_000126      | XLOC_030975          | lincRNA          | Novel_lncRNA | chr18      | 10405233 | 10421748 | +      | 2           | 1964   | 107 |
| LNC_000129      | XLOC_031801          | lincRNA          | Novel_lncRNA | chr18      | 30325126 | 30387616 | -      | 3           | 1680   | 99  |
| LNC_000128      | XLOC_031386          | lincRNA          | Novel_lncRNA | chr18      | 63828353 | 63833608 | +      | 2           | 2182   | 96  |
| LNC_000282      | XLOC_064511          | lincRNA          | Novel_lncRNA | chr7       | 64572315 | 64574832 | +      | 3           | 989    | 111 |
| LNC_000283      | XLOC_064774          | lincRNA          | Novel_lncRNA | chr7       | 76680016 | 76689485 | +      | 4           | 4042   | 119 |
| LNC_000284      | XLOC_064785          | lincRNA          | Novel_lncRNA | chr7       | 76775035 | 76790060 | +      | 2           | 12754  | 126 |

| Novel_lncRNA<br>ID | Novel_lncRNA<br>Gene_ID | Gene_Type        | Status       | Chromosome | Start    | End      | Strand | Exon<br>number | Length | ORF |
|--------------------|-------------------------|------------------|--------------|------------|----------|----------|--------|----------------|--------|-----|
| LNC_000109         | XLOC_024895             | lincRNA          | Novel_lncRNA | chr15      | 64730988 | 64737203 | -      | 2              | 1927   | 161 |
| LNC_000286         | XLOC_065217             | lincRNA          | Novel_lncRNA | chr7       | 1.21E+08 | 1.21E+08 | +      | 2              | 941    | 121 |
| LNC_000287         | XLOC_065714             | lincRNA          | Novel_lncRNA | chr7       | 1.53E+08 | 1.53E+08 | +      | 4              | 1793   | 128 |
| LNC_000301         | XLOC_068791             | lincRNA          | Novel_lncRNA | chr8       | 95195550 | 95203352 | +      | 2              | 4707   | 150 |
| LNC_000221         | XLOC_053121             | lincRNA          | Novel_lncRNA | chr4       | 26098573 | 26110517 | -      | 2              | 510    | 142 |
| LNC_000108         | XLOC_024712             | antisense_lncRNA | Novel_lncRNA | chr15      | 48262721 | 48273781 | -      | 3              | 812    | 93  |
| LNC_000300         | XLOC_067961             | lincRNA          | Novel_lncRNA | chr8       | 8919815  | 8937545  | +      | 3              | 2372   | 111 |

**Supplementary Table S6.** KEGG pathways based on differentially expressed mRNAs between the CAD and healthy control subjects.

| #Term                                      | ID       | Input number | Background number | P-Value  | Corrected P-Value |
|--------------------------------------------|----------|--------------|-------------------|----------|-------------------|
| Alzheimer's disease                        | hsa05010 | 68           | 168               | 0.000184 | 0.044807          |
| Non-alcoholic fatty liver disease (NAFLD)  | hsa04932 | 61           | 151               | 0.000398 | 0.044807          |
| Oxidative phosphorylation                  | hsa00190 | 55           | 133               | 0.000480 | 0.044807          |
| Huntington's disease                       | hsa05016 | 68           | 183               | 0.001179 | 0.082525          |
| Parkinson's disease                        | hsa05012 | 55           | 143               | 0.001806 | 0.093954          |
| Metabolic pathways                         | hsa01100 | 341          | 1213              | 0.002013 | 0.093954          |
| Carbon metabolism                          | hsa01200 | 43           | 106               | 0.002477 | 0.099067          |
| cGMP-PKG signaling pathway                 | hsa04022 | 58           | 167               | 0.008071 | 0.265728          |
| Citrate cycle (TCA cycle)                  | hsa00020 | 16           | 30                | 0.008771 | 0.265728          |
| Biosynthesis of amino acids                | hsa01230 | 30           | 74                | 0.010298 | 0.265728          |
| Peroxisome                                 | hsa04146 | 32           | 81                | 0.010971 | 0.265728          |
| Steroid biosynthesis                       | hsa00100 | 12           | 20                | 0.011549 | 0.265728          |
| PPAR signaling pathway                     | hsa03320 | 28           | 69                | 0.012743 | 0.265728          |
| Fatty acid metabolism                      | hsa01212 | 21           | 47                | 0.013286 | 0.265728          |
| Ribosome                                   | hsa03010 | 46           | 134               | 0.019464 | 0.36332           |
| 2-Oxocarboxylic acid metabolism            | hsa01210 | 10           | 17                | 0.022355 | 0.379369          |
| Fatty acid degradation                     | hsa00071 | 19           | 44                | 0.023033 | 0.379369          |
| Fatty acid elongation                      | hsa00062 | 12           | 23                | 0.024425 | 0.379944          |
| Pathways in cancer                         | hsa05200 | 97           | 327               | 0.027982 | 0.412361          |
| HTLV-I infection                           | hsa05166 | 79           | 261               | 0.031448 | 0.440274          |
| Glyoxylate and dicarboxylate metabolism    | hsa00630 | 12           | 25                | 0.037464 | 0.482967          |
| Valine, leucine and isoleucine degradation | hsa00280 | 18           | 44                | 0.038122 | 0.482967          |
| Cardiac muscle contraction                 | hsa04260 | 28           | 78                | 0.039672 | 0.482967          |

| #Term                                       | ID       | Input number | Background number | P-Value  | Corrected P-Value |
|---------------------------------------------|----------|--------------|-------------------|----------|-------------------|
| Prostate cancer                             | hsa05215 | 31           | 89                | 0.042020 | 0.490229          |
| Pyruvate metabolism                         | hsa00620 | 16           | 40                | 0.055585 | 0.589577          |
| Biosynthesis of unsaturated fatty acids     | hsa01040 | 10           | 21                | 0.056852 | 0.589577          |
| Terpenoid backbone biosynthesis             | hsa00900 | 10           | 21                | 0.056852 | 0.589577          |
| Estrogen signaling pathway                  | hsa04915 | 32           | 100               | 0.083257 | 0.832567          |
| Thyroid hormone synthesis                   | hsa04918 | 24           | 72                | 0.091634 | 0.884738          |
| Cell cycle                                  | hsa04110 | 38           | 124               | 0.095338 | 0.889823          |
| Synthesis and degradation of ketone bodies  | hsa00072 | 5            | 9                 | 0.110801 | 1                 |
| Osteoclast differentiation                  | hsa04380 | 39           | 131               | 0.118896 | 1                 |
| Protein processing in endoplasmic reticulum | hsa04141 | 48           | 168               | 0.137780 | 1                 |
| Proteasome                                  | hsa03050 | 15           | 44                | 0.141687 | 1                 |
| GnRH signaling pathway                      | hsa04912 | 28           | 92                | 0.142378 | 1                 |
| Glycolysis / Gluconeogenesis                | hsa00010 | 21           | 66                | 0.143710 | 1                 |
| Glycerolipid metabolism                     | hsa00561 | 18           | 55                | 0.143858 | 1                 |
| Legionellosis                               | hsa05134 | 18           | 55                | 0.143858 | 1                 |
| One carbon pool by folate                   | hsa00670 | 8            | 20                | 0.149478 | 1                 |
| Viral carcinogenesis                        | hsa05203 | 57           | 206               | 0.159374 | 1                 |
| Bladder cancer                              | hsa05219 | 13           | 38                | 0.160934 | 1                 |
| Glutathione metabolism                      | hsa00480 | 16           | 49                | 0.163065 | 1                 |
| TNF signaling pathway                       | hsa04668 | 32           | 110               | 0.171939 | 1                 |
| Propanoate metabolism                       | hsa00640 | 10           | 28                | 0.174359 | 1                 |
| alpha-Linolenic acid metabolism             | hsa00592 | 9            | 25                | 0.186515 | 1                 |
| Arachidonic acid metabolism                 | hsa00590 | 19           | 62                | 0.192028 | 1                 |
| AMPK signaling pathway                      | hsa04152 | 35           | 124               | 0.197964 | 1                 |
| Insulin secretion                           | hsa04911 | 25           | 86                | 0.208120 | 1                 |



| #Term                                                                   | ID       | Input number | Background number | P-Value  | Corrected P-Value |
|-------------------------------------------------------------------------|----------|--------------|-------------------|----------|-------------------|
| Vascular smooth muscle contraction                                      | hsa04270 | 34           | 121               | 0.208273 | 1                 |
| Cell adhesion molecules (CAMs)                                          | hsa04514 | 40           | 145               | 0.212926 | 1                 |
| Adrenergic signaling in cardiomyocytes                                  | hsa04261 | 41           | 149               | 0.213480 | 1                 |
| Oocyte meiosis                                                          | hsa04114 | 31           | 110               | 0.217109 | 1                 |
| ECM-receptor interaction                                                | hsa04512 | 25           | 87                | 0.222092 | 1                 |
| Acute myeloid leukemia                                                  | hsa05221 | 17           | 57                | 0.235553 | 1                 |
| Steroid hormone biosynthesis                                            | hsa00140 | 17           | 57                | 0.235553 | 1                 |
| Circadian rhythm                                                        | hsa04710 | 10           | 31                | 0.245156 | 1                 |
| Glycosaminoglycan biosynthesis - chondroitin sulfate / dermatan sulfate | hsa00532 | 7            | 20                | 0.245359 | 1                 |
| Fatty acid biosynthesis                                                 | hsa00061 | 5            | 13                | 0.249550 | 1                 |
| Non-homologous end-joining                                              | hsa03450 | 5            | 13                | 0.249550 | 1                 |
| Dorso-ventral axis formation                                            | hsa04320 | 8            | 24                | 0.256036 | 1                 |
| Adipocytokine signaling pathway                                         | hsa04920 | 20           | 70                | 0.260350 | 1                 |
| Small cell lung cancer                                                  | hsa05222 | 24           | 86                | 0.265545 | 1                 |
| Ovarian steroidogenesis                                                 | hsa04913 | 15           | 51                | 0.268049 | 1                 |
| HIF-1 signaling pathway                                                 | hsa04066 | 29           | 106               | 0.268824 | 1                 |
| Sulfur metabolism                                                       | hsa00920 | 4            | 10                | 0.270510 | 1                 |
| Ubiquinone and other terpenoid-quinone biosynthesis                     | hsa00130 | 4            | 10                | 0.270510 | 1                 |
| Focal adhesion                                                          | hsa04510 | 54           | 207               | 0.275446 | 1                 |
| Notch signaling pathway                                                 | hsa04330 | 14           | 48                | 0.286441 | 1                 |
| Fanconi anemia pathway                                                  | hsa03460 | 15           | 53                | 0.309993 | 1                 |
| VEGF signaling pathway                                                  | hsa04370 | 17           | 61                | 0.312151 | 1                 |
| Melanogenesis                                                           | hsa04916 | 27           | 101               | 0.313352 | 1                 |
| Circadian entrainment                                                   | hsa04713 | 26           | 97                | 0.313640 | 1                 |
| Transcriptional misregulation in cancer                                 | hsa05202 | 46           | 179               | 0.325680 | 1                 |

| #Term                                               | ID       | Input number | Background number | P-Value  | Corrected P-Value |
|-----------------------------------------------------|----------|--------------|-------------------|----------|-------------------|
| Oxytocin signaling pathway                          | hsa04921 | 41           | 159               | 0.330776 | 1                 |
| Colorectal cancer                                   | hsa05210 | 17           | 62                | 0.332344 | 1                 |
| Renal cell carcinoma                                | hsa05211 | 18           | 66                | 0.332444 | 1                 |
| Axon guidance                                       | hsa04360 | 33           | 127               | 0.338979 | 1                 |
| Mismatch repair                                     | hsa03430 | 7            | 23                | 0.343826 | 1                 |
| Protein export                                      | hsa03060 | 7            | 23                | 0.343826 | 1                 |
| Antigen processing and presentation                 | hsa04612 | 21           | 79                | 0.350246 | 1                 |
| Tyrosine metabolism                                 | hsa00350 | 10           | 35                | 0.351556 | 1                 |
| Mineral absorption                                  | hsa04978 | 14           | 51                | 0.353689 | 1                 |
| Endometrial cancer                                  | hsa05213 | 14           | 52                | 0.376746 | 1                 |
| ABC transporters                                    | hsa02010 | 12           | 44                | 0.378394 | 1                 |
| Glycine, serine and threonine metabolism            | hsa00260 | 11           | 40                | 0.378978 | 1                 |
| Fructose and mannose metabolism                     | hsa00051 | 9            | 32                | 0.379349 | 1                 |
| Arginine and proline metabolism                     | hsa00330 | 16           | 61                | 0.396296 | 1                 |
| Caffeine metabolism                                 | hsa00232 | 2            | 5                 | 0.397808 | 1                 |
| Cyanoamino acid metabolism                          | hsa00460 | 2            | 5                 | 0.397808 | 1                 |
| Phenylalanine, tyrosine and tryptophan biosynthesis | hsa00400 | 2            | 5                 | 0.397808 | 1                 |
| NOD-like receptor signaling pathway                 | hsa04621 | 15           | 57                | 0.398135 | 1                 |
| N-Glycan biosynthesis                               | hsa00510 | 13           | 49                | 0.401830 | 1                 |
| Thyroid hormone signaling pathway                   | hsa04919 | 30           | 119               | 0.403521 | 1                 |
| Epstein-Barr virus infection                        | hsa05169 | 50           | 202               | 0.403573 | 1                 |
| Wnt signaling pathway                               | hsa04310 | 35           | 140               | 0.407828 | 1                 |
| Linoleic acid metabolism                            | hsa00591 | 8            | 29                | 0.410538 | 1                 |
| Thyroid cancer                                      | hsa05216 | 8            | 29                | 0.410538 | 1                 |
| MAPK signaling pathway                              | hsa04010 | 63           | 257               | 0.412660 | 1                 |

| #Term                                            | ID       | Input number | Background number | P-Value  | Corrected P-Value |
|--------------------------------------------------|----------|--------------|-------------------|----------|-------------------|
| Cocaine addiction                                | hsa05030 | 13           | 50                | 0.426108 | 1                 |
| Proteoglycans in cancer                          | hsa05205 | 50           | 204               | 0.427641 | 1                 |
| Hepatitis B                                      | hsa05161 | 36           | 146               | 0.434216 | 1                 |
| Glycerophospholipid metabolism                   | hsa00564 | 23           | 92                | 0.437703 | 1                 |
| Cholinergic synapse                              | hsa04725 | 28           | 113               | 0.440336 | 1                 |
| Basal cell carcinoma                             | hsa05217 | 14           | 55                | 0.446654 | 1                 |
| Lysine degradation                               | hsa00310 | 13           | 51                | 0.450378 | 1                 |
| Amphetamine addiction                            | hsa05031 | 17           | 68                | 0.457624 | 1                 |
| Ether lipid metabolism                           | hsa00565 | 11           | 43                | 0.458547 | 1                 |
| Folate biosynthesis                              | hsa00790 | 4            | 14                | 0.458931 | 1                 |
| Gap junction                                     | hsa04540 | 22           | 89                | 0.459127 | 1                 |
| Long-term depression                             | hsa04730 | 15           | 60                | 0.465591 | 1                 |
| Phosphatidylinositol signaling system            | hsa04070 | 20           | 81                | 0.466391 | 1                 |
| Adherens junction                                | hsa04520 | 18           | 73                | 0.474340 | 1                 |
| Salivary secretion                               | hsa04970 | 22           | 90                | 0.477514 | 1                 |
| Glioma                                           | hsa05214 | 16           | 65                | 0.483146 | 1                 |
| Proximal tubule bicarbonate reclamation          | hsa04964 | 6            | 23                | 0.486302 | 1                 |
| Inflammatory mediator regulation of TRP channels | hsa04750 | 24           | 99                | 0.487575 | 1                 |
| Inositol phosphate metabolism                    | hsa00562 | 15           | 61                | 0.487944 | 1                 |
| Alcoholism                                       | hsa05034 | 43           | 180               | 0.496217 | 1                 |
| Calcium signaling pathway                        | hsa04020 | 43           | 180               | 0.496217 | 1                 |
| Pentose and glucuronate interconversions         | hsa00040 | 9            | 36                | 0.497120 | 1                 |
| Prion diseases                                   | hsa05020 | 9            | 36                | 0.497120 | 1                 |
| ErbB signaling pathway                           | hsa04012 | 21           | 87                | 0.500230 | 1                 |
| Pancreatic cancer                                | hsa05212 | 16           | 66                | 0.504643 | 1                 |

| #Term                                                      | ID       | Input number | Background number | P-Value  | Corrected P-Value |
|------------------------------------------------------------|----------|--------------|-------------------|----------|-------------------|
| Tight junction                                             | hsa04530 | 32           | 134               | 0.505447 | 1                 |
| Pancreatic secretion                                       | hsa04972 | 23           | 96                | 0.509442 | 1                 |
| Vasopressin-regulated water reabsorption                   | hsa04962 | 11           | 45                | 0.510885 | 1                 |
| Pentose phosphate pathway                                  | hsa00030 | 7            | 28                | 0.512447 | 1                 |
| Gastric acid secretion                                     | hsa04971 | 18           | 75                | 0.514798 | 1                 |
| Porphyrin and chlorophyll metabolism                       | hsa00860 | 10           | 41                | 0.517941 | 1                 |
| Dopaminergic synapse                                       | hsa04728 | 31           | 131               | 0.524467 | 1                 |
| Long-term potentiation                                     | hsa04720 | 16           | 67                | 0.525933 | 1                 |
| Drug metabolism - other enzymes                            | hsa00983 | 11           | 46                | 0.536523 | 1                 |
| Epithelial cell signaling in Helicobacter pylori infection | hsa05120 | 16           | 68                | 0.546962 | 1                 |
| Cysteine and methionine metabolism                         | hsa00270 | 9            | 38                | 0.553840 | 1                 |
| Progesterone-mediated oocyte maturation                    | hsa04914 | 20           | 86                | 0.561313 | 1                 |
| beta-Alanine metabolism                                    | hsa00410 | 7            | 30                | 0.575979 | 1                 |
| Arrhythmogenic right ventricular cardiomyopathy (ARVC)     | hsa05412 | 17           | 74                | 0.580751 | 1                 |
| Pantothenate and CoA biosynthesis                          | hsa00770 | 4            | 17                | 0.588868 | 1                 |
| Platelet activation                                        | hsa04611 | 30           | 131               | 0.589111 | 1                 |
| Glycosphingolipid biosynthesis - lacto and neolacto series | hsa00601 | 6            | 26                | 0.589881 | 1                 |
| Butanoate metabolism                                       | hsa00650 | 6            | 26                | 0.589881 | 1                 |
| Alanine, aspartate and glutamate metabolism                | hsa00250 | 8            | 35                | 0.592845 | 1                 |
| Ubiquitin mediated proteolysis                             | hsa04120 | 31           | 137               | 0.613047 | 1                 |
| Rap1 signaling pathway                                     | hsa04015 | 48           | 211               | 0.613848 | 1                 |
| B cell receptor signaling pathway                          | hsa04662 | 16           | 72                | 0.627494 | 1                 |
| Other glycan degradation                                   | hsa00511 | 4            | 18                | 0.627892 | 1                 |
| Phenylalanine metabolism                                   | hsa00360 | 4            | 18                | 0.627892 | 1                 |
| PI3K-Akt signaling pathway                                 | hsa04151 | 79           | 347               | 0.630751 | 1                 |

| #Term                                                     | ID       | Input number | Background number | P-Value  | Corrected P-Value |
|-----------------------------------------------------------|----------|--------------|-------------------|----------|-------------------|
| p53 signaling pathway                                     | hsa04115 | 15           | 68                | 0.636137 | 1                 |
| Endocytosis                                               | hsa04144 | 48           | 213               | 0.636553 | 1                 |
| Apoptosis                                                 | hsa04210 | 19           | 86                | 0.640224 | 1                 |
| Salmonella infection                                      | hsa05132 | 19           | 86                | 0.640224 | 1                 |
| Histidine metabolism                                      | hsa00340 | 5            | 23                | 0.640790 | 1                 |
| NF-kappa B signaling pathway                              | hsa04064 | 20           | 91                | 0.649803 | 1                 |
| Homologous recombination                                  | hsa03440 | 6            | 28                | 0.652410 | 1                 |
| Amoebiasis                                                | hsa05146 | 24           | 109               | 0.653789 | 1                 |
| Viral myocarditis                                         | hsa05416 | 13           | 60                | 0.655339 | 1                 |
| Amyotrophic lateral sclerosis (ALS)                       | hsa05014 | 11           | 51                | 0.656062 | 1                 |
| Regulation of actin cytoskeleton                          | hsa04810 | 48           | 215               | 0.658665 | 1                 |
| Systemic lupus erythematosus                              | hsa05322 | 30           | 136               | 0.660302 | 1                 |
| Sphingolipid metabolism                                   | hsa00600 | 10           | 47                | 0.668379 | 1                 |
| Vitamin digestion and absorption                          | hsa04977 | 5            | 24                | 0.672975 | 1                 |
| Morphine addiction                                        | hsa05032 | 20           | 93                | 0.682557 | 1                 |
| Endocrine and other factor-regulated calcium reabsorption | hsa04961 | 10           | 48                | 0.690607 | 1                 |
| Type II diabetes mellitus                                 | hsa04930 | 10           | 48                | 0.690607 | 1                 |
| Glutamatergic synapse                                     | hsa04724 | 25           | 116               | 0.691256 | 1                 |
| Glycosphingolipid biosynthesis - ganglio series           | hsa00604 | 3            | 15                | 0.695732 | 1                 |
| Retrograde endocannabinoid signaling                      | hsa04723 | 22           | 103               | 0.698013 | 1                 |
| Bacterial invasion of epithelial cells                    | hsa05100 | 16           | 76                | 0.700447 | 1                 |
| Dilated cardiomyopathy                                    | hsa05414 | 19           | 90                | 0.706462 | 1                 |
| GABAergic synapse                                         | hsa04727 | 19           | 90                | 0.706462 | 1                 |
| Prolactin signaling pathway                               | hsa04917 | 15           | 72                | 0.710205 | 1                 |
| Butirosin and neomycin biosynthesis                       | hsa00524 | 1            | 5                 | 0.719255 | 1                 |

| #Term                                                    | ID       | Input number | Background number | P-Value  | Corrected P-Value |
|----------------------------------------------------------|----------|--------------|-------------------|----------|-------------------|
| Tryptophan metabolism                                    | hsa00380 | 8            | 40                | 0.720491 | 1                 |
| Insulin signaling pathway                                | hsa04910 | 30           | 141               | 0.724821 | 1                 |
| Carbohydrate digestion and absorption                    | hsa04973 | 9            | 45                | 0.726403 | 1                 |
| Chronic myeloid leukemia                                 | hsa05220 | 15           | 73                | 0.727200 | 1                 |
| Mucin type O-Glycan biosynthesis                         | hsa00512 | 6            | 31                | 0.734394 | 1                 |
| Galactose metabolism                                     | hsa00052 | 6            | 31                | 0.734394 | 1                 |
| Other types of O-glycan biosynthesis                     | hsa00514 | 6            | 31                | 0.734394 | 1                 |
| Neurotrophin signaling pathway                           | hsa04722 | 25           | 120               | 0.744831 | 1                 |
| Fc epsilon RI signaling pathway                          | hsa04664 | 14           | 70                | 0.754148 | 1                 |
| Ascorbate and aldarate metabolism                        | hsa00053 | 5            | 27                | 0.757599 | 1                 |
| Shigellosis                                              | hsa05131 | 12           | 61                | 0.760821 | 1                 |
| Primary bile acid biosynthesis                           | hsa00120 | 3            | 17                | 0.764154 | 1                 |
| Selenocompound metabolism                                | hsa00450 | 3            | 17                | 0.764154 | 1                 |
| Nitrogen metabolism                                      | hsa00910 | 3            | 17                | 0.764154 | 1                 |
| Melanoma                                                 | hsa05218 | 14           | 71                | 0.769884 | 1                 |
| Influenza A                                              | hsa05164 | 37           | 177               | 0.772841 | 1                 |
| Riboflavin metabolism                                    | hsa00740 | 2            | 12                | 0.778043 | 1                 |
| Phagosome                                                | hsa04145 | 32           | 155               | 0.780097 | 1                 |
| Base excision repair                                     | hsa03410 | 6            | 33                | 0.780824 | 1                 |
| Serotonergic synapse                                     | hsa04726 | 23           | 114               | 0.783660 | 1                 |
| Fc gamma R-mediated phagocytosis                         | hsa04666 | 18           | 91                | 0.787021 | 1                 |
| Signaling pathways regulating pluripotency of stem cells | hsa04550 | 29           | 142               | 0.787619 | 1                 |
| Drug metabolism - cytochrome P450                        | hsa00982 | 13           | 68                | 0.796105 | 1                 |
| Allograft rejection                                      | hsa05330 | 7            | 39                | 0.800789 | 1                 |
| Phototransduction                                        | hsa04744 | 5            | 29                | 0.804148 | 1                 |

| #Term                                         | ID       | Input number | Background number | P-Value  | Corrected P-Value |
|-----------------------------------------------|----------|--------------|-------------------|----------|-------------------|
| Hypertrophic cardiomyopathy (HCM)             | hsa05410 | 16           | 83                | 0.805613 | 1                 |
| Metabolism of xenobiotics by cytochrome P450  | hsa00980 | 14           | 74                | 0.812872 | 1                 |
| Hippo signaling pathway                       | hsa04390 | 31           | 154               | 0.815105 | 1                 |
| Type I diabetes mellitus                      | hsa04940 | 8            | 45                | 0.818220 | 1                 |
| Nicotine addiction                            | hsa05033 | 7            | 40                | 0.818904 | 1                 |
| Pathogenic Escherichia coli infection         | hsa05130 | 10           | 55                | 0.819198 | 1                 |
| Leukocyte transendothelial migration          | hsa04670 | 23           | 118               | 0.827352 | 1                 |
| Chemical carcinogenesis                       | hsa05204 | 15           | 80                | 0.827932 | 1                 |
| Non-small cell lung cancer                    | hsa05223 | 10           | 56                | 0.833711 | 1                 |
| Fat digestion and absorption                  | hsa04975 | 7            | 41                | 0.835706 | 1                 |
| DNA replication                               | hsa03030 | 6            | 36                | 0.838545 | 1                 |
| Glycosphingolipid biosynthesis - globo series | hsa00603 | 2            | 14                | 0.838748 | 1                 |
| mRNA surveillance pathway                     | hsa03015 | 17           | 91                | 0.843401 | 1                 |
| Rheumatoid arthritis                          | hsa05323 | 17           | 91                | 0.843401 | 1                 |
| Purine metabolism                             | hsa00230 | 35           | 176               | 0.844519 | 1                 |
| FoxO signaling pathway                        | hsa04068 | 26           | 134               | 0.845030 | 1                 |
| Toxoplasmosis                                 | hsa05145 | 23           | 120               | 0.846636 | 1                 |
| Staphylococcus aureus infection               | hsa05150 | 10           | 57                | 0.847308 | 1                 |
| Hedgehog signaling pathway                    | hsa04340 | 9            | 52                | 0.847806 | 1                 |
| Nucleotide excision repair                    | hsa03420 | 8            | 47                | 0.849033 | 1                 |
| Toll-like receptor signaling pathway          | hsa04620 | 20           | 106               | 0.849408 | 1                 |
| Herpes simplex infection                      | hsa05168 | 37           | 186               | 0.849930 | 1                 |
| Taurine and hypotaurine metabolism            | hsa00430 | 1            | 8                 | 0.851262 | 1                 |
| Asthma                                        | hsa05310 | 5            | 32                | 0.860323 | 1                 |
| RNA polymerase                                | hsa03020 | 5            | 32                | 0.860323 | 1                 |

| #Term                                            | ID       | Input number | Background number | P-Value  | Corrected P-Value |
|--------------------------------------------------|----------|--------------|-------------------|----------|-------------------|
| Hematopoietic cell lineage                       | hsa04640 | 16           | 88                | 0.862517 | 1                 |
| Glycosaminoglycan biosynthesis - keratan sulfate | hsa00533 | 2            | 15                | 0.863079 | 1                 |
| Graft-versus-host disease                        | hsa05332 | 7            | 43                | 0.865569 | 1                 |
| Collecting duct acid secretion                   | hsa04966 | 4            | 27                | 0.868700 | 1                 |
| Leishmaniasis                                    | hsa05140 | 13           | 74                | 0.870634 | 1                 |
| Retinol metabolism                               | hsa00830 | 11           | 64                | 0.871021 | 1                 |
| Protein digestion and absorption                 | hsa04974 | 16           | 89                | 0.872173 | 1                 |
| cAMP signaling pathway                           | hsa04024 | 39           | 200               | 0.881148 | 1                 |
| Aldosterone-regulated sodium reabsorption        | hsa04960 | 6            | 39                | 0.883309 | 1                 |
| Pyrimidine metabolism                            | hsa00240 | 19           | 105               | 0.883502 | 1                 |
| Nicotinate and nicotinamide metabolism           | hsa00760 | 4            | 28                | 0.884572 | 1                 |
| RNA transport                                    | hsa03013 | 31           | 163               | 0.885584 | 1                 |
| SNARE interactions in vesicular transport        | hsa04130 | 5            | 34                | 0.889723 | 1                 |
| Starch and sucrose metabolism                    | hsa00500 | 9            | 56                | 0.895221 | 1                 |
| Tuberculosis                                     | hsa05152 | 34           | 179               | 0.896314 | 1                 |
| Renin-angiotensin system                         | hsa04614 | 2            | 17                | 0.901919 | 1                 |
| Sulfur relay system                              | hsa04122 | 1            | 10                | 0.902619 | 1                 |
| Amino sugar and nucleotide sugar metabolism      | hsa00520 | 7            | 47                | 0.911948 | 1                 |
| T cell receptor signaling pathway                | hsa04660 | 18           | 104               | 0.912419 | 1                 |
| Primary immunodeficiency                         | hsa05340 | 5            | 36                | 0.913627 | 1                 |
| Natural killer cell mediated cytotoxicity        | hsa04650 | 24           | 134               | 0.914488 | 1                 |
| RNA degradation                                  | hsa03018 | 12           | 74                | 0.915836 | 1                 |
| Cytosolic DNA-sensing pathway                    | hsa04623 | 10           | 64                | 0.919487 | 1                 |
| Neuroactive ligand-receptor interaction          | hsa04080 | 53           | 275               | 0.925160 | 1                 |
| Vibrio cholerae infection                        | hsa05110 | 8            | 54                | 0.925362 | 1                 |



| #Term                                                      | ID       | Input number | Background number | P-Value  | Corrected P-Value |
|------------------------------------------------------------|----------|--------------|-------------------|----------|-------------------|
| Autoimmune thyroid disease                                 | hsa05320 | 8            | 54                | 0.925362 | 1                 |
| Malaria                                                    | hsa05144 | 7            | 49                | 0.929456 | 1                 |
| Glycosaminoglycan degradation                              | hsa00531 | 2            | 19                | 0.930264 | 1                 |
| Ribosome biogenesis in eukaryotes                          | hsa03008 | 13           | 84                | 0.945332 | 1                 |
| Synaptic vesicle cycle                                     | hsa04721 | 9            | 63                | 0.948557 | 1                 |
| African trypanosomiasis                                    | hsa05143 | 4            | 34                | 0.948895 | 1                 |
| TGF-beta signaling pathway                                 | hsa04350 | 12           | 80                | 0.951796 | 1                 |
| Lysosome                                                   | hsa04142 | 20           | 122               | 0.952367 | 1                 |
| Taste transduction                                         | hsa04742 | 7            | 53                | 0.955546 | 1                 |
| RIG-I-like receptor signaling pathway                      | hsa04622 | 10           | 70                | 0.955937 | 1                 |
| Ras signaling pathway                                      | hsa04014 | 41           | 228               | 0.957301 | 1                 |
| Spliceosome                                                | hsa03040 | 21           | 130               | 0.962084 | 1                 |
| Chagas disease (American trypanosomiasis)                  | hsa05142 | 16           | 104               | 0.962355 | 1                 |
| Bile secretion                                             | hsa04976 | 10           | 72                | 0.964318 | 1                 |
| Chemokine signaling pathway                                | hsa04062 | 32           | 189               | 0.969978 | 1                 |
| Hepatitis C                                                | hsa05160 | 21           | 133               | 0.970291 | 1                 |
| Glycosaminoglycan biosynthesis - heparan sulfate / heparin | hsa00534 | 2            | 24                | 0.971031 | 1                 |
| Pertussis                                                  | hsa05133 | 10           | 75                | 0.974223 | 1                 |
| mTOR signaling pathway                                     | hsa04150 | 7            | 60                | 0.981199 | 1                 |
| Jak-STAT signaling pathway                                 | hsa04630 | 24           | 156               | 0.983781 | 1                 |
| Intestinal immune network for IgA production               | hsa04672 | 5            | 49                | 0.984930 | 1                 |
| Complement and coagulation cascades                        | hsa04610 | 8            | 69                | 0.986939 | 1                 |
| Measles                                                    | hsa05162 | 19           | 134               | 0.989454 | 1                 |
| Inflammatory bowel disease (IBD)                           | hsa05321 | 7            | 67                | 0.992489 | 1                 |
| Maturity onset diabetes of the young                       | hsa04950 | 1            | 25                | 0.995941 | 1                 |

| #Term                                                 | ID       | Input number | Background number | P-Value  | Corrected P-Value |
|-------------------------------------------------------|----------|--------------|-------------------|----------|-------------------|
| Glycosylphosphatidylinositol(GPI)-anchor biosynthesis | hsa00563 | 1            | 25                | 0.995941 | 1                 |
| Basal transcription factors                           | hsa03022 | 3            | 45                | 0.997118 | 1                 |
| Regulation of autophagy                               | hsa04140 | 2            | 39                | 0.998196 | 1                 |
| MicroRNAs in cancer                                   | hsa05206 | 45           | 297               | 0.998618 | 1                 |
| Cytokine-cytokine receptor interaction                | hsa04060 | 37           | 265               | 0.999457 | 1                 |
| Aminoacyl-tRNA biosynthesis                           | hsa00970 | 3            | 66                | 0.999934 | 1                 |
| Olfactory transduction                                | hsa04740 | 12           | 405               | 1.000000 | 1                 |

**Supplementary Table S7.** Functions of differentially expressed lncRNAs based on lncRNA-mRNA co-expression and co-location network. co-expression (in trans)

| lncRNA_ID  | lncRNA_Gene_ID | Status       | mRNA_Gene_ID    | mRNA_Gene<br>Symbol | PCC         | <i>P</i> value |
|------------|----------------|--------------|-----------------|---------------------|-------------|----------------|
| LNC_000049 | XLOC_009083    | Novel_lncRNA | ENSG00000134755 | DSC2                | 0.954711164 | 0.000224       |
| LNC_000049 | XLOC_009083    | Novel_lncRNA | ENSG00000185966 | LCE3E               | 0.963192173 | 0.000121       |
| LNC_000057 | XLOC_010023    | Novel_lncRNA | ENSG00000140519 | RHCG                | 0.966894691 | 8.85E-05       |
| LNC_000057 | XLOC_010023    | Novel_lncRNA | ENSG00000063176 | SPHK2               | 0.965867375 | 9.69E-05       |
| LNC_000057 | XLOC_010023    | Novel_lncRNA | ENSG00000090905 | TNRC6A              | 0.992353896 | 1.11E-06       |
| LNC_000089 | XLOC_019043    | Novel_lncRNA | ENSG00000171711 | DEFB4A              | 0.966450708 | 0.000092       |
| LNC_000089 | XLOC_019043    | Novel_lncRNA | ENSG00000140519 | RHCG                | 0.977316092 | 2.87E-05       |
| LNC_000097 | XLOC_021040    | Novel_lncRNA | ENSG00000157985 | AGAP1               | 0.959665983 | 0.000159       |
| LNC_000097 | XLOC_021040    | Novel_lncRNA | ENSG00000186832 | KRT16               | 0.983806403 | 1.05E-05       |
| LNC_000097 | XLOC_021040    | Novel_lncRNA | ENSG00000205420 | KRT6A               | 0.964893411 | 0.000105       |
| LNC_000097 | XLOC_021040    | Novel_lncRNA | ENSG00000185479 | KRT6B               | 0.984935012 | 8.45E-06       |
| LNC_000097 | XLOC_021040    | Novel_lncRNA | ENSG00000170465 | KRT6C               | 0.983193541 | 1.17E-05       |
| LNC_000097 | XLOC_021040    | Novel_lncRNA | ENSG00000185966 | LCE3E               | 0.964183444 | 0.000112       |
| LNC_000098 | XLOC_021043    | Novel_lncRNA | ENSG00000171711 | DEFB4A              | 0.952327975 | 0.000261       |
| LNC_000098 | XLOC_021043    | Novel_lncRNA | ENSG00000134755 | DSC2                | 0.968326513 | 7.76E-05       |
| LNC_000099 | XLOC_022153    | Novel_lncRNA | ENSG00000140519 | RHCG                | 0.995352861 | 2.5E-07        |
| LNC_000102 | XLOC_022585    | Novel_lncRNA | ENSG00000171711 | DEFB4A              | 0.984766445 | 8.74E-06       |
| LNC_000104 | XLOC_023709    | Novel_lncRNA | ENSG00000072518 | MARK2               | 0.959347568 | 0.000163       |
| LNC_000262 | XLOC_060045    | Novel_lncRNA | ENSG00000143452 | HORMAD1             | 0.992997346 | 8.54E-07       |
| LNC_000262 | XLOC_060045    | Novel_lncRNA | ENSG00000150995 | ITPR1               | 0.992039029 | 1.25E-06       |
| LNC_000291 | XLOC_066346    | Novel_lncRNA | ENSG00000185479 | KRT6B               | 0.984626445 | 8.98E-06       |
| LNC_000291 | XLOC_066346    | Novel_lncRNA | ENSG00000185966 | LCE3E               | 0.996999162 | 6.74E-08       |
| LNC_000310 | XLOC_070305    | Novel_lncRNA | ENSG00000186832 | KRT16               | 0.96474883  | 0.000107       |

| lncRNA_ID               | lncRNA_Gene_ID     | Status             | mRNA_Gene_ID     | mRNA_Gene<br>Symbol | PCC              | <i>P</i> value |
|-------------------------|--------------------|--------------------|------------------|---------------------|------------------|----------------|
| LNC_000311              | XLOC_070305        | Novel_lncRNA       | ENSG00000157985  | AGAP1               | 0.971898129      | 5.43E-05       |
| LNC_000311              | XLOC_070305        | Novel_lncRNA       | ENSG00000131778  | CHD1L               | 0.950737963      | 0.000288       |
| LNC_000311              | XLOC_070305        | Novel_lncRNA       | ENSG00000186832  | KRT16               | 0.986797601      | 5.7E-06        |
| LNC_000311              | XLOC_070305        | Novel_lncRNA       | ENSG00000205420  | KRT6A               | 0.996406379      | 1.16E-07       |
| LNC_000311              | XLOC_070305        | Novel_lncRNA       | ENSG00000170465  | KRT6C               | 0.993553555      | 6.66E-07       |
| LNC_000329              | XLOC_073645        | Novel_lncRNA       | ENSG00000214517  | PPME1               | 0.970375012      | 6.36E-05       |
| AC092162.1              | ENSG00000230552.5  | Annotated_lncRNA   | ENSG00000168490  | PHYHIP              | 0.951735811      | 0.000271       |
| LINC01094               | ENSG00000251442.5  | Annotated_lncRNA   | ENSG00000205420  | KRT6A               | 0.95073002       | 0.000288       |
| PSMD5-AS1               | ENSG00000226752.7  | Annotated_lncRNA   | ENSG00000150995  | ITPR1               | 0.971957562      | 0.000054       |
| RP11-1112J20.2          | ENSG00000259093.1  | Annotated_lncRNA   | ENSG00000171711  | DEFB4A              | 0.95464201       | 0.000225       |
| RP11-356I2.4            | ENSG00000237499.6  | Annotated_lncRNA   | ENSG00000170345  | FOS                 | 0.98741927       | 4.93E-06       |
| RP11-356I2.4            | ENSG00000237499.6  | Annotated_lncRNA   | ENSG00000125740  | FOSB                | 0.961295984      | 0.000141       |
| RP11-356I2.4            | ENSG00000237499.6  | Annotated_lncRNA   | ENSG00000168490  | PHYHIP              | 0.974579649      | 4.03E-05       |
| RP11-783K16.5           | ENSG00000256940.1  | Annotated_lncRNA   | ENSG00000198074  | AKR1B10             | 0.951570847      | 0.000274       |
| RP11-783K16.5           | ENSG00000256940.1  | Annotated_lncRNA   | ENSG00000134755  | DSC2                | 0.98150861       | 1.56E-05       |
| RP11-783K16.5           | ENSG00000256940.1  | Annotated_lncRNA   | ENSG00000185966  | LCE3E               | 0.961640025      | 0.000137       |
| SNHG5                   | ENSG00000203875.10 | Annotated_lncRNA   | ENSG00000125740  | FOSB                | 0.964646052      | 0.000108       |
| XIST                    | ENSG00000229807.9  | Annotated_lncRNA   | ENSG00000115947  | ORC4                | 0.982184894      | 1.39E-05       |
| co-expression(in trans) |                    |                    |                  |                     |                  |                |
| Chromosome              | lncRNA_Gene_ID     | lncRNA_Gene_Symbol | lncRNA_Status    | mRNA_Gene_Id        | mRNA_Gene_Symbol | Distance       |
| chr6                    | ENSG00000237499.6  | RP11-356I2.4       | Annotated_lncRNA | ENSG00000118503     | TNFAIP3          | -261           |
